# Supplementary material
Source: Research Square preprint supplement (doi:10.21203/rs.3.rs-9674922/v1)

Results File: D:\Spinco\data\Linearity.iproc - AminoAcid\_MRM\_RT\_16052024.lcm

**Compound: Alanine**  
Curve Fit: Linear | Weighting: 1/C | Zero: Not Forced  
Quantitative Method: External Standard  
Q 90.20>44.30  
R<sup>2</sup> = 0.9992449 R = 0.9996224  
y = 4260160x - 1524.503

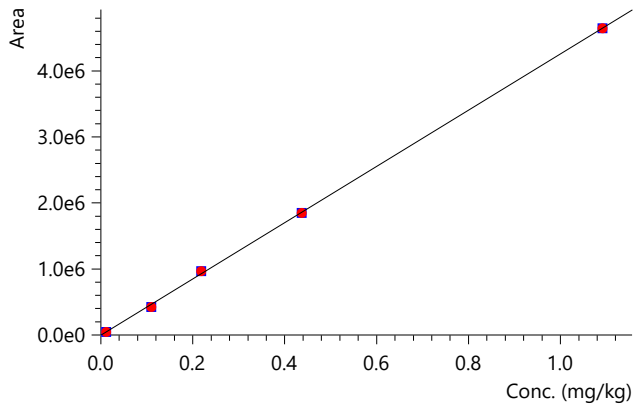

| Sample Name             | Sample Type | Level | Found RT | Area    | R <sup>2</sup> | Conc.    | Unit  | Accuracy(%) | Sample Amt. | Dil. Factor |
|-------------------------|-------------|-------|----------|---------|----------------|----------|-------|-------------|-------------|-------------|
| Amino Acid CC_01        | Std.        | 1     | 2.428    | 46912   | 0.9992449      | 0.0114   | mg/kg | 104.20      | 1.00000     | 1.00000     |
| Amino Acid CC_02        | Std.        | 2     | 2.428    | 424510  | 0.9992449      | 0.1000   | mg/kg | 91.65       | 1.00000     | 1.00000     |
| Amino Acid CC_03        | Std.        | 3     | 2.428    | 970239  | 0.9992449      | 0.2281   | mg/kg | 104.53      | 1.00000     | 1.00000     |
| Amino Acid CC_04        | Std.        | 4     | 2.428    | 1849563 | 0.9992449      | 0.4345   | mg/kg | 99.56       | 1.00000     | 1.00000     |
| Amino Acid CC_05        | Std.        | 5     | 2.428    | 4649898 | 0.9992449      | 1.0918   | mg/kg | 100.07      | 1.00000     | 1.00000     |
| Ulva Seaweeds Sample_01 | Unk.        | ----  | 2.428    | 993149  | 0.9992449      | 233.4826 | mg/kg | ----        | 0.10000     | 100.00000   |
| Ulva Seaweeds Sample_02 | Unk.        | ----  | 2.428    | 992965  | 0.9992449      | 233.4394 | mg/kg | ----        | 0.10000     | 100.00000   |
| Ulva Seaweeds Sample_03 | Unk.        | ----  | 2.428    | 1012270 | 0.9992449      | 237.9709 | mg/kg | ----        | 0.10000     | 100.00000   |
| Ulva Seaweeds Sample_04 | Unk.        | ----  | 2.428    | 1002031 | 0.9992449      | 235.5677 | mg/kg | ----        | 0.10000     | 100.00000   |

**Amino Acid CC\_01**

Conc. 0.0114  
Area 46912  
R#1 90.30>45.20 12.60 (0.00)  
Q 90.20>44.30 (+)

6.71e3

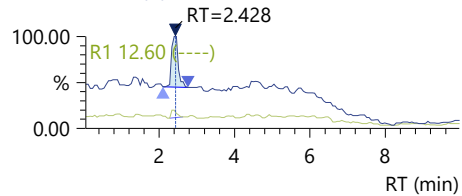

**Amino Acid CC\_02**

Conc. 0.1000  
Area 424510  
R#1 90.30>45.20 9.01 (0.00)  
Q 90.20>44.30 (+)

4.53e4

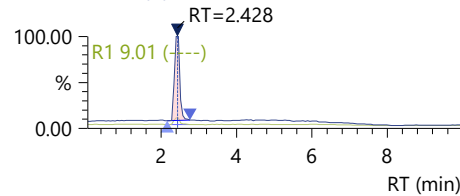

**Amino Acid CC\_03**

Conc. 0.2281  
Area 970239  
R#1 90.30>45.20 7.71 (0.00)  
Q 90.20>44.30 (+)

1.02e5

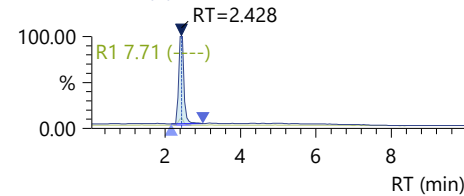

**Amino Acid CC\_04**

Conc. 0.4345  
Area 1849563  
R#1 90.30>45.20 7.51 (0.00)  
Q 90.20>44.30 (+)

1.97e5

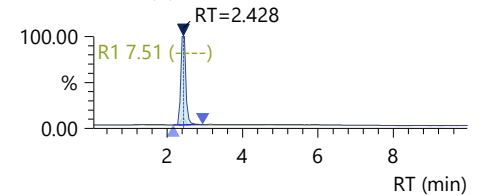

**Compound: Alanine (continued)****Amino Acid CC\_05**

Conc. 1.0918

Area 4649898

R#1 90.30&gt;45.20 7.82 (0.00)

Q 90.20&gt;44.30 (+)

4.90e5

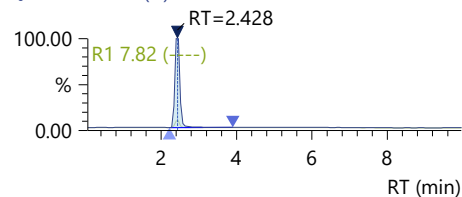**Ulva Seaweeds Sample\_01**

Conc. 233.4826

Area 993149

R#1 90.30&gt;45.20 8.44 (0.00)

Q 90.20&gt;44.30 (+)

1.19e5

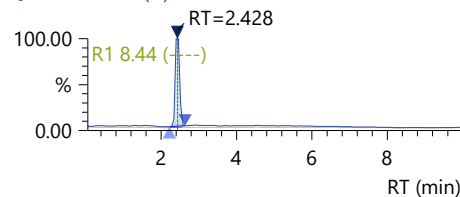**Ulva Seaweeds Sample\_02**

Conc. 233.4394

Area 992965

R#1 90.30&gt;45.20 9.29 (0.00)

Q 90.20&gt;44.30 (+)

1.21e5

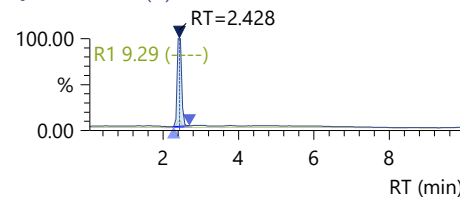**Ulva Seaweeds Sample\_03**

Conc. 237.9709

Area 1012270

R#1 90.30&gt;45.20 8.79 (0.00)

Q 90.20&gt;44.30 (+)

1.25e5

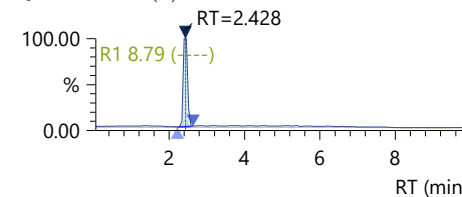**Ulva Seaweeds Sample\_04**

Conc. 235.5677

Area 1002031

R#1 90.30&gt;45.20 9.11 (0.00)

Q 90.20&gt;44.30 (+)

1.24e5

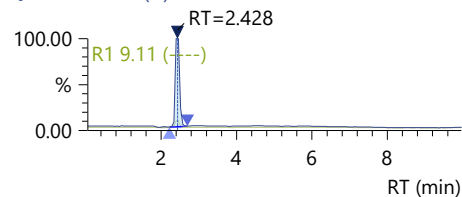**Compound: Arginine**

Curve Fit: Linear | Weighting: None | Zero: Not Forced

Quantitative Method: External Standard

Q 175.40&gt;70.20

 $R^2 = 0.9992694$   $R = 0.9996346$  $y = 6820792x - 152094.8$ 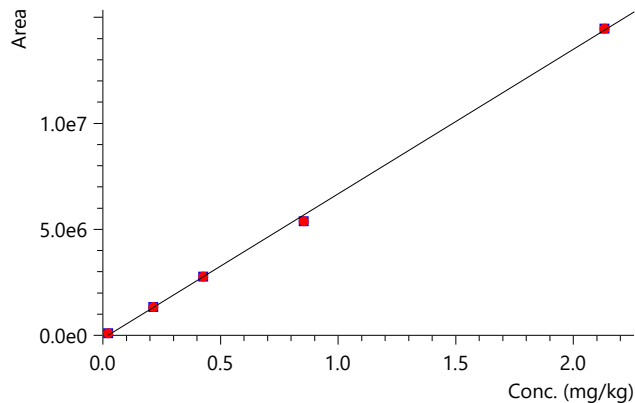

## Compound: Arginine (continued)

| Sample Name             | Sample Type | Level | Found RT | Area     | R <sup>2</sup> | Conc.    | Unit  | Accuracy(%) | Sample Amt. | Dil. Factor |
|-------------------------|-------------|-------|----------|----------|----------------|----------|-------|-------------|-------------|-------------|
| Amino Acid CC_01        | Std.        | 1     | 2.133    | 101910   | 0.9992694      | 0.0372   | mg/kg | 174.71      | 1.00000     | 1.00000     |
| Amino Acid CC_02        | Std.        | 2     | 2.133    | 1342041  | 0.9992694      | 0.2191   | mg/kg | 102.77      | 1.00000     | 1.00000     |
| Amino Acid CC_03        | Std.        | 3     | 2.133    | 2778550  | 0.9992694      | 0.4297   | mg/kg | 100.79      | 1.00000     | 1.00000     |
| Amino Acid CC_04        | Std.        | 4     | 2.133    | 5393134  | 0.9992694      | 0.8130   | mg/kg | 95.35       | 1.00000     | 1.00000     |
| Amino Acid CC_05        | Std.        | 5     | 2.133    | 14484876 | 0.9992694      | 2.1459   | mg/kg | 100.68      | 1.00000     | 1.00000     |
| Ulva Seaweeds Sample_01 | Unk.        | ----  | 1.953    | 2130508  | 0.9992694      | 334.6537 | mg/kg | ----        | 0.10000     | 100.00000   |
| Ulva Seaweeds Sample_02 | Unk.        | ----  | 1.953    | 1815882  | 0.9992694      | 288.5261 | mg/kg | ----        | 0.10000     | 100.00000   |
| Ulva Seaweeds Sample_03 | Unk.        | ----  | 1.953    | 1766378  | 0.9992694      | 281.2683 | mg/kg | ----        | 0.10000     | 100.00000   |
| Ulva Seaweeds Sample_04 | Unk.        | ----  | 1.953    | 1745819  | 0.9992694      | 278.2541 | mg/kg | ----        | 0.10000     | 100.00000   |

## Amino Acid CC\_01

Conc. 0.0372

Area 101910

R#1 175.40&gt;60.20 34.70 (30.39)

Q 175.40&gt;70.20 (+)

1.29e4

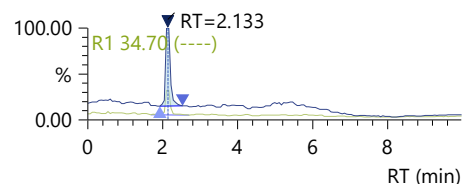

## Amino Acid CC\_02

Conc. 0.2191

Area 1342041

R#1 175.40&gt;60.20 30.49 (30.39)

Q 175.40&gt;70.20 (+)

1.56e5

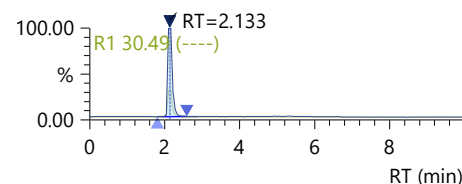

## Amino Acid CC\_03

Conc. 0.4297

Area 2778550

R#1 175.40&gt;60.20 28.63 (30.39)

Q 175.40&gt;70.20 (+)

3.14e5

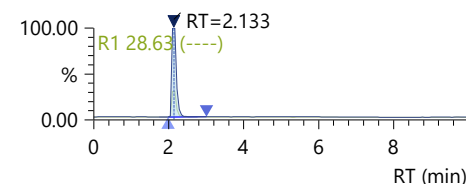

## Amino Acid CC\_04

Conc. 0.8130

Area 5393134

R#1 175.40&gt;60.20 29.48 (30.39)

Q 175.40&gt;70.20 (+)

6.05e5

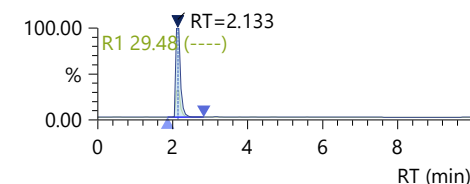

## Amino Acid CC\_05

Conc. 2.1459

Area 14484876

R#1 175.40&gt;60.20 28.63 (30.39)

Q 175.40&gt;70.20 (+)

1.57e6

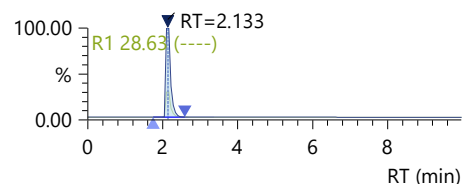

## Ulva Seaweeds Sample\_01

Conc. 334.6537

Area 2130508

R#1 175.40&gt;60.20 2.21 (30.39)

Q 175.40&gt;70.20 (+)

1.68e5

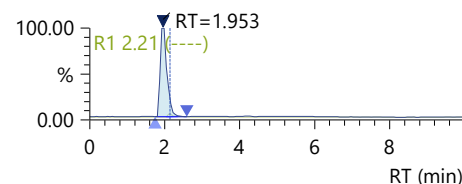

## Ulva Seaweeds Sample\_02

Conc. 288.5261

Area 1815882

R#1 175.40&gt;60.20 3.76 (30.39)

Q 175.40&gt;70.20 (+)

1.44e5

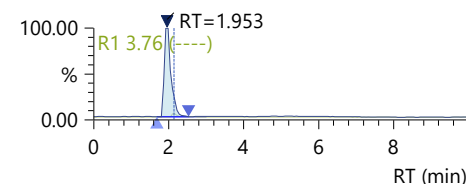

## Ulva Seaweeds Sample\_03

Conc. 281.2683

Area 1766378

R#1 175.40&gt;60.20 2.77 (30.39)

Q 175.40&gt;70.20 (+)

1.38e5

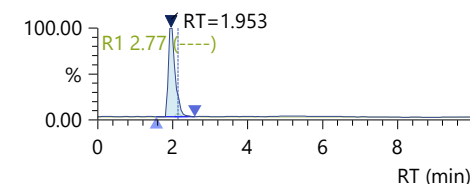

**Compound: Arginine (continued)****Ulva Seaweeds Sample\_04**

Conc. 278.2541

Area 1745819

R#1 175.40&gt;60.20 2.57 (30.39)

Q 175.40&gt;70.20 (+)

1.36e5

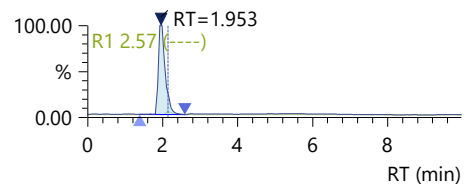**Compound: Aspartic Acid**

Curve Fit: Linear | Weighting: None | Zero: Not Forced

Quantitative Method: External Standard

Q 134.30&gt;74.10

 $R^2 = 0.9990038$   $R = 0.9995018$  $y = 3028723x + 48013.04$ 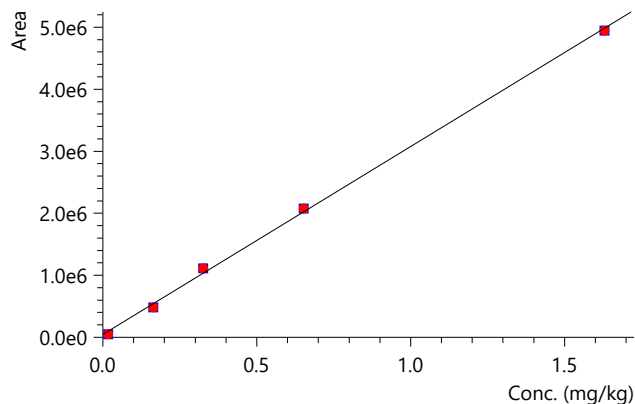

| Sample Name             | Sample Type | Level | Found RT | Area    | R <sup>2</sup> | Conc.    | Unit  | Accuracy(%) | Sample Amt. | Dil. Factor |
|-------------------------|-------------|-------|----------|---------|----------------|----------|-------|-------------|-------------|-------------|
| Amino Acid CC_01        | Std.        | 1     | 2.437    | 51685   | 0.9990038      | 0.0012   | mg/kg | 7.44        | 1.00000     | 1.00000     |
| Amino Acid CC_02        | Std.        | 2     | 2.437    | 486084  | 0.9990038      | 0.1446   | mg/kg | 88.79       | 1.00000     | 1.00000     |
| Amino Acid CC_03        | Std.        | 3     | 2.437    | 1111969 | 0.9990038      | 0.3513   | mg/kg | 107.82      | 1.00000     | 1.00000     |
| Amino Acid CC_04        | Std.        | 4     | 2.437    | 2077118 | 0.9990038      | 0.6700   | mg/kg | 102.81      | 1.00000     | 1.00000     |
| Amino Acid CC_05        | Std.        | 5     | 2.437    | 4950418 | 0.9990038      | 1.6186   | mg/kg | 99.36       | 1.00000     | 1.00000     |
| Ulva Seaweeds Sample_01 | Unk.        | ----  | 2.437    | 924719  | 0.9990038      | 289.4637 | mg/kg | ----        | 0.10000     | 100.00000   |
| Ulva Seaweeds Sample_02 | Unk.        | ----  | 2.437    | 927869  | 0.9990038      | 290.5040 | mg/kg | ----        | 0.10000     | 100.00000   |
| Ulva Seaweeds Sample_03 | Unk.        | ----  | 2.437    | 903096  | 0.9990038      | 282.3245 | mg/kg | ----        | 0.10000     | 100.00000   |
| Ulva Seaweeds Sample_04 | Unk.        | ----  | 2.437    | 919253  | 0.9990038      | 287.6593 | mg/kg | ----        | 0.10000     | 100.00000   |

**Compound: Aspartic Acid (continued)****Amino Acid CC\_01**

Conc. 0.0012

Area 51685

R#1 134.20&gt;116.10 17.61 (25.12)

Q 134.30&gt;74.10 (+)

7.01e3

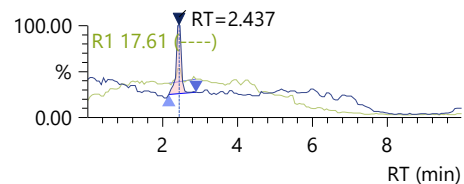**Amino Acid CC\_02**

Conc. 0.1446

Area 486084

R#1 134.20&gt;116.10 26.46 (25.12)

Q 134.30&gt;74.10 (+)

5.10e4

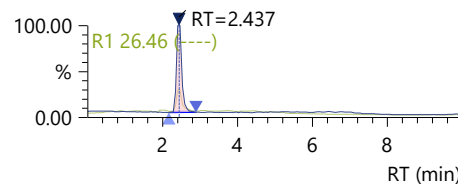**Amino Acid CC\_03**

Conc. 0.3513

Area 1111969

R#1 134.20&gt;116.10 26.81 (25.12)

Q 134.30&gt;74.10 (+)

1.17e5

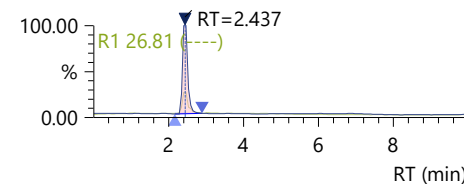**Amino Acid CC\_04**

Conc. 0.6700

Area 2077118

R#1 134.20&gt;116.10 27.69 (25.12)

Q 134.30&gt;74.10 (+)

2.16e5

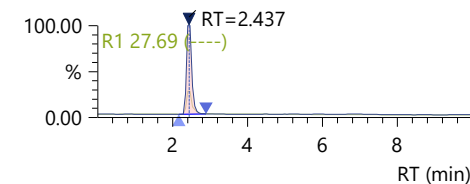**Amino Acid CC\_05**

Conc. 1.6186

Area 4950418

R#1 134.20&gt;116.10 27.02 (25.12)

Q 134.30&gt;74.10 (+)

5.20e5

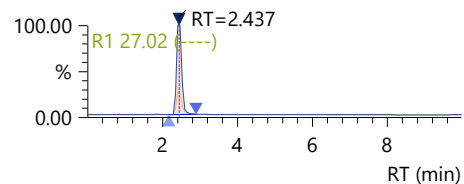**Ulva Seaweeds Sample\_01**

Conc. 289.4637

Area 924719

R#1 134.20&gt;116.10 0.00 (25.12)

Q 134.30&gt;74.10 (+)

7.67e4

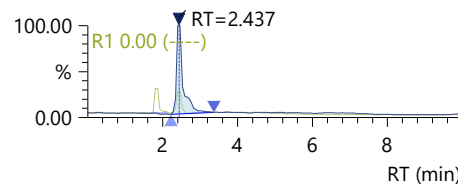**Ulva Seaweeds Sample\_02**

Conc. 290.5040

Area 927869

R#1 134.20&gt;116.10 18.57 (25.12)

Q 134.30&gt;74.10 (+)

7.70e4

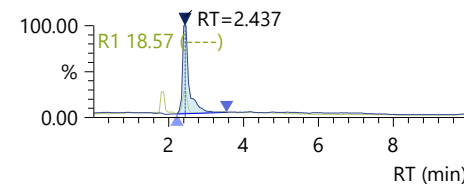**Ulva Seaweeds Sample\_03**

Conc. 282.3245

Area 903096

R#1 134.20&gt;116.10 19.35 (25.12)

Q 134.30&gt;74.10 (+)

8.09e4

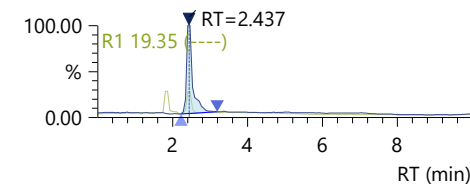**Ulva Seaweeds Sample\_04**

Conc. 287.6593

Area 919253

R#1 134.20&gt;116.10 0.00 (25.12)

Q 134.30&gt;74.10 (+)

8.21e4

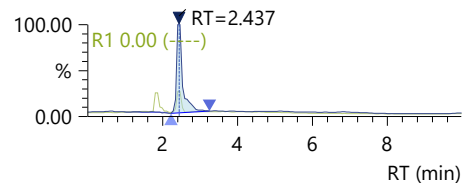

**Compound: Cystine**

Curve Fit: Linear | Weighting: None | Zero: Not Forced

Quantitative Method: External Standard

Q 241.30&gt;152.10

 $R^2 = 0.9997103$   $R = 0.9998552$  $y = 2577657x - 43181.65$ 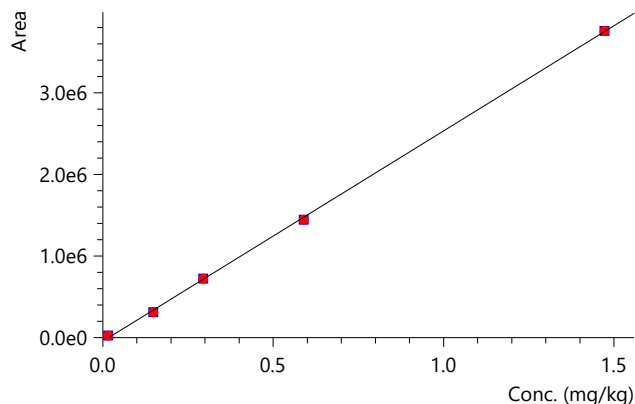

| Sample Name             | Sample Type | Level | Found RT | Area    | R <sup>2</sup> | Conc.   | Unit  | Accuracy(%) | Sample Amt. | Dil. Factor |
|-------------------------|-------------|-------|----------|---------|----------------|---------|-------|-------------|-------------|-------------|
| Amino Acid CC_01        | Std.        | 1     | 2.320    | 26547   | 0.9997103      | 0.0271  | mg/kg | 183.80      | 1.00000     | 1.00000     |
| Amino Acid CC_02        | Std.        | 2     | 2.320    | 313078  | 0.9997103      | 0.1382  | mg/kg | 93.91       | 1.00000     | 1.00000     |
| Amino Acid CC_03        | Std.        | 3     | 2.320    | 724050  | 0.9997103      | 0.2976  | mg/kg | 101.12      | 1.00000     | 1.00000     |
| Amino Acid CC_04        | Std.        | 4     | 2.320    | 1445172 | 0.9997103      | 0.5774  | mg/kg | 98.08       | 1.00000     | 1.00000     |
| Amino Acid CC_05        | Std.        | 5     | 2.320    | 3762445 | 0.9997103      | 1.4764  | mg/kg | 100.31      | 1.00000     | 1.00000     |
| Ulva Seaweeds Sample_01 | Unk.        | ----  | 2.801    | 8079    | 0.9997103      | 19.8865 | mg/kg | ----        | 0.10000     | 100.00000   |
| Ulva Seaweeds Sample_02 | Unk.        | ----  | 4.363    | 4339    | 0.9997103      | 18.4355 | mg/kg | ----        | 0.10000     | 100.00000   |
| Ulva Seaweeds Sample_03 | Unk.        | ----  | 2.380    | 2311    | 0.9997103      | 17.6488 | mg/kg | ----        | 0.10000     | 100.00000   |
| Ulva Seaweeds Sample_04 | Unk.        | ----  | 2.291    | 2642    | 0.9997103      | 17.7774 | mg/kg | ----        | 0.10000     | 100.00000   |

**Amino Acid CC\_01**

Conc. 0.0271

Area 26547

R#1 241.30&gt;74.20 0.00 (115.05)

Q 241.30&gt;152.10 (+)

2.87e3

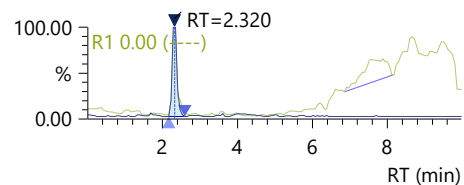**Amino Acid CC\_02**

Conc. 0.1382

Area 313078

R#1 241.30&gt;74.20 97.33 (115.05)

Q 241.30&gt;152.10 (+)

3.51e4

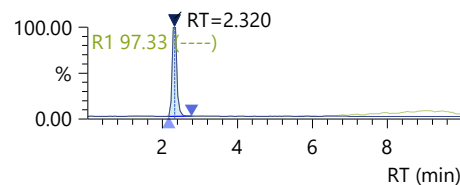**Amino Acid CC\_03**

Conc. 0.2976

Area 724050

R#1 241.30&gt;74.20 89.65 (115.05)

Q 241.30&gt;152.10 (+)

8.05e4

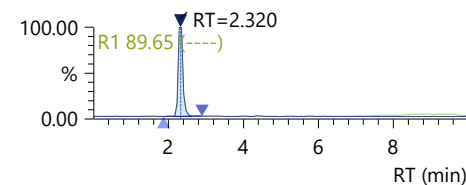**Amino Acid CC\_04**

Conc. 0.5774

Area 1445172

R#1 241.30&gt;74.20 89.84 (115.05)

Q 241.30&gt;152.10 (+)

1.61e5

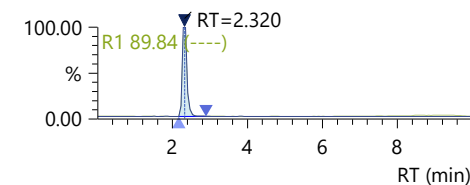

**Compound: Cystine (continued)****Amino Acid CC\_05**

Conc. 1.4764

Area 3762445

R#1 241.30&gt;74.20 91.74 (115.05)

Q 241.30&gt;152.10 (+)

4.24e5

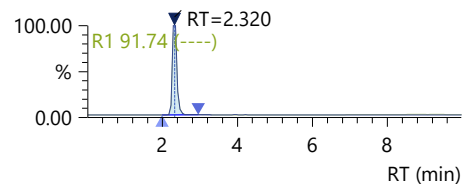**Ulva Seaweeds Sample\_01**

Conc. 19.8865

Area 8079

R#1 241.30&gt;74.20 0.00 (115.05)

Q 241.30&gt;152.10 (+)

1.11e3

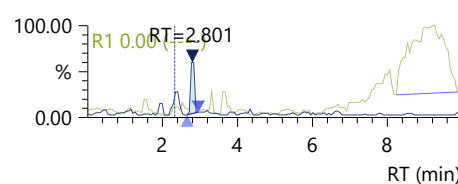**Ulva Seaweeds Sample\_02**

Conc. 18.4355

Area 4339

R#1 241.30&gt;74.20 0.00 (115.05)

Q 241.30&gt;152.10 (+)

5.19e2

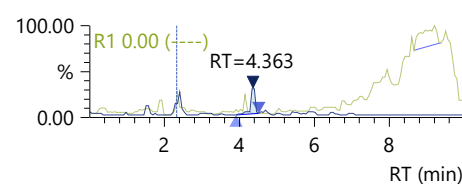**Ulva Seaweeds Sample\_03**

Conc. 17.6488

Area 2311

R#1 241.30&gt;74.20 0.00 (115.05)

Q 241.30&gt;152.10 (+)

2.44e2

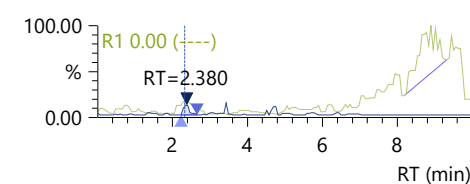**Ulva Seaweeds Sample\_04**

Conc. 17.7774

Area 2642

R#1 241.30&gt;74.20 0.00 (115.05)

Q 241.30&gt;152.10 (+)

4.12e2

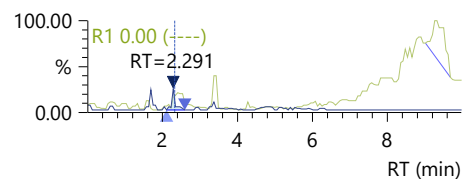**Compound: Glutamic Acid**

Curve Fit: Linear | Weighting: None | Zero: Not Forced

Quantitative Method: External Standard

Q 148.30&gt;84.20

 $R^2 = 0.9997798$   $R = 0.9998899$  $y = 8325977x + 5385.750$ 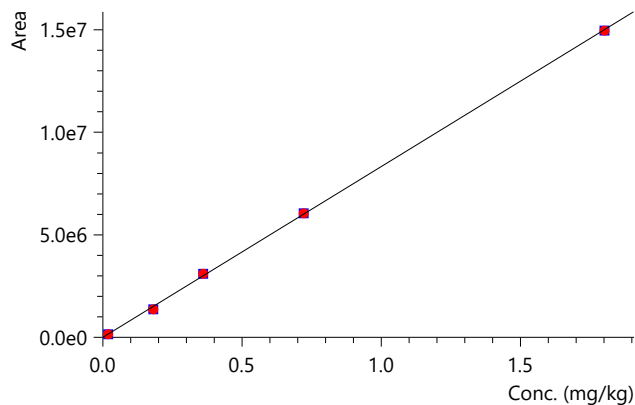

## Compound: Glutamic Acid (continued)

| Sample Name             | Sample Type | Level | Found RT | Area     | R <sup>2</sup> | Conc.    | Unit  | Accuracy(%) | Sample Amt. | Dil. Factor |
|-------------------------|-------------|-------|----------|----------|----------------|----------|-------|-------------|-------------|-------------|
| Amino Acid CC_01        | Std.        | 1     | 2.444    | 158901   | 0.9997798      | 0.0184   | mg/kg | 102.34      | 1.00000     | 1.00000     |
| Amino Acid CC_02        | Std.        | 2     | 2.444    | 1376065  | 0.9997798      | 0.1646   | mg/kg | 91.38       | 1.00000     | 1.00000     |
| Amino Acid CC_03        | Std.        | 3     | 2.444    | 3112489  | 0.9997798      | 0.3732   | mg/kg | 103.57      | 1.00000     | 1.00000     |
| Amino Acid CC_04        | Std.        | 4     | 2.444    | 6051065  | 0.9997798      | 0.7261   | mg/kg | 100.76      | 1.00000     | 1.00000     |
| Amino Acid CC_05        | Std.        | 5     | 2.444    | 14979027 | 0.9997798      | 1.7984   | mg/kg | 99.82       | 1.00000     | 1.00000     |
| Ulva Seaweeds Sample_01 | Unk.        | ----  | 2.444    | 2954395  | 0.9997798      | 354.1937 | mg/kg | ----        | 0.10000     | 100.00000   |
| Ulva Seaweeds Sample_02 | Unk.        | ----  | 2.444    | 3071038  | 0.9997798      | 368.2033 | mg/kg | ----        | 0.10000     | 100.00000   |
| Ulva Seaweeds Sample_03 | Unk.        | ----  | 2.444    | 2984287  | 0.9997798      | 357.7840 | mg/kg | ----        | 0.10000     | 100.00000   |
| Ulva Seaweeds Sample_04 | Unk.        | ----  | 2.444    | 2975729  | 0.9997798      | 356.7561 | mg/kg | ----        | 0.10000     | 100.00000   |

## Amino Acid CC\_01

Conc. 0.0184

Area 158901

R#1 148.30&gt;102.20 25.87 (24.92)

Q 148.30&gt;84.20 (+)

1.65e4

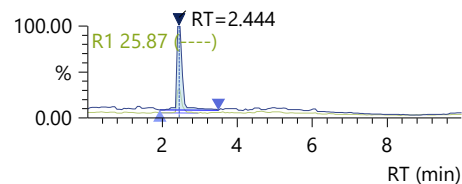

## Amino Acid CC\_02

Conc. 0.1646

Area 1376065

R#1 148.30&gt;102.20 24.42 (24.92)

Q 148.30&gt;84.20 (+)

1.51e5

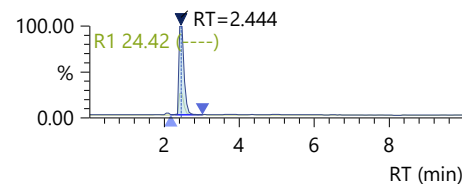

## Amino Acid CC\_03

Conc. 0.3732

Area 3112489

R#1 148.30&gt;102.20 24.70 (24.92)

Q 148.30&gt;84.20 (+)

3.30e5

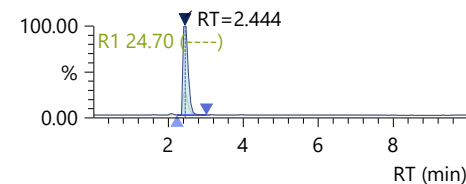

## Amino Acid CC\_04

Conc. 0.7261

Area 6051065

R#1 148.30&gt;102.20 25.28 (24.92)

Q 148.30&gt;84.20 (+)

6.18e5

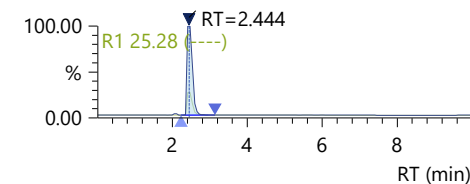

## Amino Acid CC\_05

Conc. 1.7984

Area 14979027

R#1 148.30&gt;102.20 24.34 (24.92)

Q 148.30&gt;84.20 (+)

1.59e6

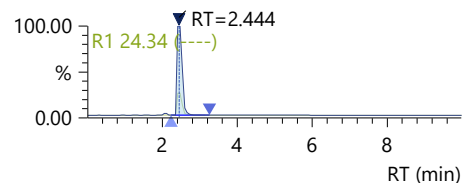

## Ulva Seaweeds Sample\_01

Conc. 354.1937

Area 2954395

R#1 148.30&gt;102.20 25.41 (24.92)

Q 148.30&gt;84.20 (+)

3.10e5

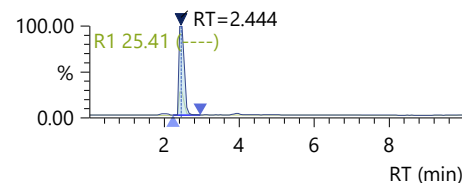

## Ulva Seaweeds Sample\_02

Conc. 368.2033

Area 3071038

R#1 148.30&gt;102.20 24.58 (24.92)

Q 148.30&gt;84.20 (+)

3.26e5

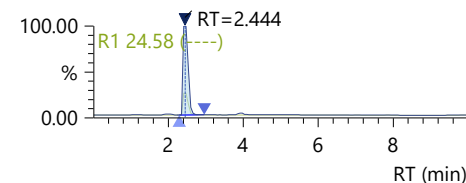

## Ulva Seaweeds Sample\_03

Conc. 357.7840

Area 2984287

R#1 148.30&gt;102.20 25.65 (24.92)

Q 148.30&gt;84.20 (+)

3.11e5

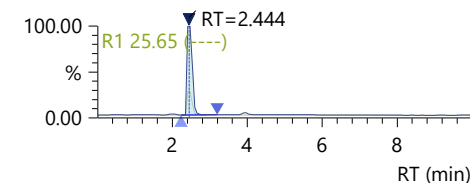



**Compound: Glutamic Acid (continued)****Ulva Seaweeds Sample\_04**

Conc. 356.7561

Area 2975729

R#1 148.30&gt;102.20 24.04 (24.92)

Q 148.30&gt;84.20 (+)

3.06e5

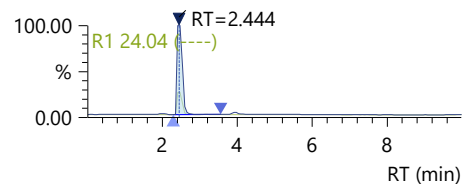**Compound: Glycine**

Curve Fit: Linear | Weighting: None | Zero: Not Forced

Quantitative Method: External Standard

Q 76.20&gt;30.10

 $R^2 = 0.9992718$   $R = 0.9996358$  $y = 1122969x + 17040.15$ 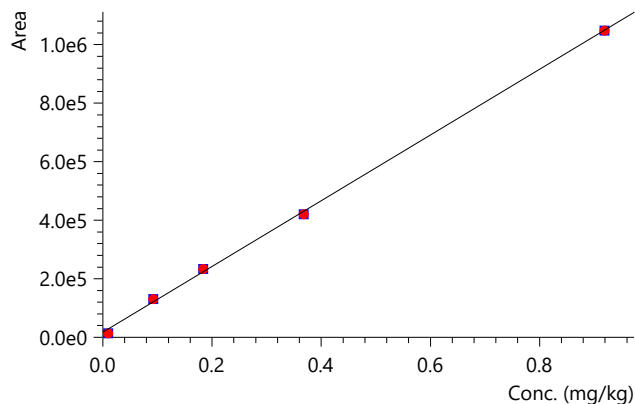

| Sample Name             | Sample Type | Level | Found RT | Area    | R <sup>2</sup> | Conc.    | Unit  | Accuracy(%) | Sample Amt. | Dil. Factor |
|-------------------------|-------------|-------|----------|---------|----------------|----------|-------|-------------|-------------|-------------|
| Amino Acid CC_01        | Std.        | 1     | 2.327    | 14186   | 0.9992718      | -0.0025  | mg/kg | -27.67      | 1.00000     | 1.00000     |
| Amino Acid CC_02        | Std.        | 2     | 2.327    | 131262  | 0.9992718      | 0.1017   | mg/kg | 110.73      | 1.00000     | 1.00000     |
| Amino Acid CC_03        | Std.        | 3     | 2.327    | 233842  | 0.9992718      | 0.1931   | mg/kg | 105.09      | 1.00000     | 1.00000     |
| Amino Acid CC_04        | Std.        | 4     | 2.327    | 420790  | 0.9992718      | 0.3595   | mg/kg | 97.85       | 1.00000     | 1.00000     |
| Amino Acid CC_05        | Std.        | 5     | 2.327    | 1049048 | 0.9992718      | 0.9190   | mg/kg | 100.05      | 1.00000     | 1.00000     |
| Ulva Seaweeds Sample_01 | Unk.        | ----  | 2.327    | 124293  | 0.9992718      | 95.5085  | mg/kg | ----        | 0.10000     | 100.00000   |
| Ulva Seaweeds Sample_02 | Unk.        | ----  | 2.327    | 115850  | 0.9992718      | 87.9901  | mg/kg | ----        | 0.10000     | 100.00000   |
| Ulva Seaweeds Sample_03 | Unk.        | ----  | 2.327    | 131575  | 0.9992718      | 101.9932 | mg/kg | ----        | 0.10000     | 100.00000   |
| Ulva Seaweeds Sample_04 | Unk.        | ----  | 2.387    | 120796  | 0.9992718      | 92.3946  | mg/kg | ----        | 0.10000     | 100.00000   |

**Compound: Glycine (continued)****Amino Acid CC\_01**

Conc. -0.0025

Area 14186

R#1 76.20&gt;30.20 87.04 (92.79)

Q 76.20&gt;30.10 (+)

2.17e3

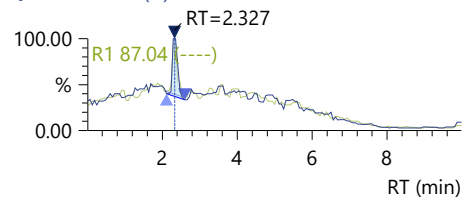**Amino Acid CC\_02**

Conc. 0.1017

Area 131262

R#1 76.20&gt;30.20 89.36 (92.79)

Q 76.20&gt;30.10 (+)

1.51e4

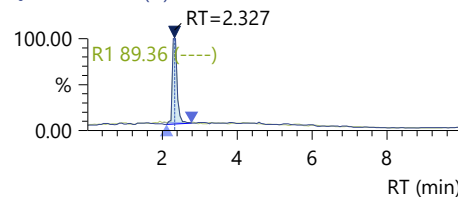**Amino Acid CC\_03**

Conc. 0.1931

Area 233842

R#1 76.20&gt;30.20 96.05 (92.79)

Q 76.20&gt;30.10 (+)

2.66e4

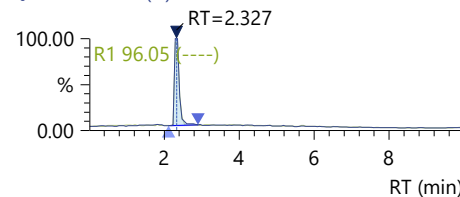**Amino Acid CC\_04**

Conc. 0.3595

Area 420790

R#1 76.20&gt;30.20 97.41 (92.79)

Q 76.20&gt;30.10 (+)

4.83e4

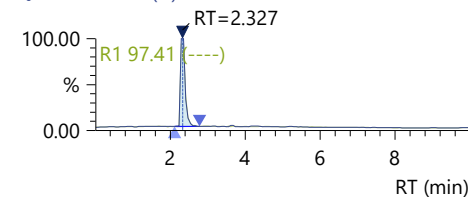**Amino Acid CC\_05**

Conc. 0.9190

Area 1049048

R#1 76.20&gt;30.20 95.01 (92.79)

Q 76.20&gt;30.10 (+)

1.19e5

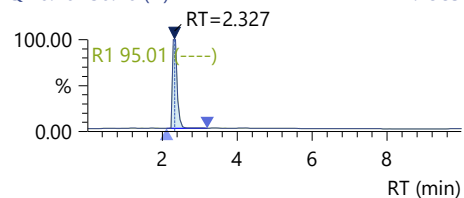**Ulva Seaweeds Sample\_01**

Conc. 95.5085

Area 124293

R#1 76.20&gt;30.20 94.95 (92.79)

Q 76.20&gt;30.10 (+)

1.13e4

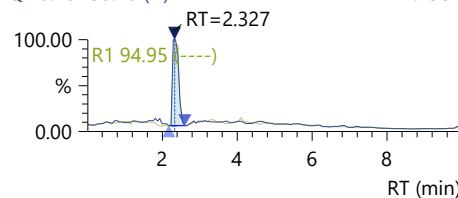**Ulva Seaweeds Sample\_02**

Conc. 87.9901

Area 115850

R#1 76.20&gt;30.20 98.16 (92.79)

Q 76.20&gt;30.10 (+)

1.00e4

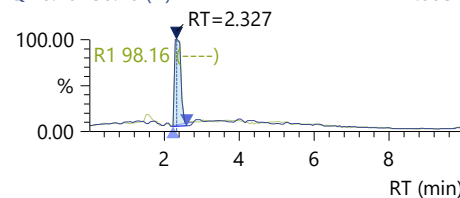**Ulva Seaweeds Sample\_03**

Conc. 101.9932

Area 131575

R#1 76.20&gt;30.20 92.33 (92.79)

Q 76.20&gt;30.10 (+)

1.04e4

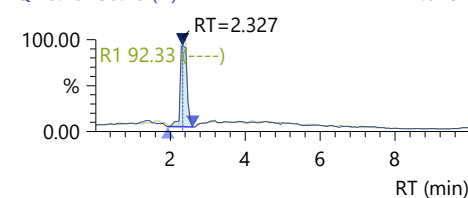**Ulva Seaweeds Sample\_04**

Conc. 92.3946

Area 120796

R#1 76.20&gt;30.20 99.85 (92.79)

Q 76.20&gt;30.10 (+)

1.01e4

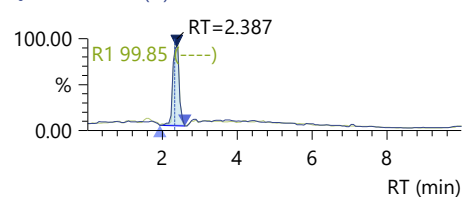

**Compound: Histidine**

Curve Fit: Linear | Weighting: None | Zero: Not Forced

Quantitative Method: External Standard

Q 156.40&gt;110.30

 $R^2 = 0.9995873$   $R = 0.9997936$  $y = 3237409x + 63590.16$ 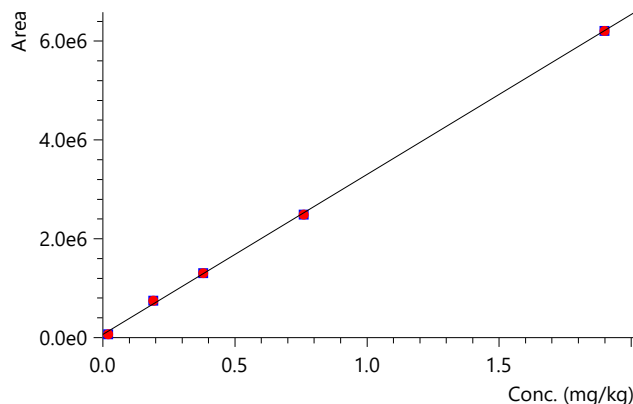

| Sample Name             | Sample Type | Level | Found RT | Area    | R <sup>2</sup> | Conc.   | Unit  | Accuracy(%) | Sample Amt. | Dil. Factor |
|-------------------------|-------------|-------|----------|---------|----------------|---------|-------|-------------|-------------|-------------|
| Amino Acid CC_01        | Std.        | 1     | 2.150    | 68037   | 0.9995873      | 0.0014  | mg/kg | 7.24        | 1.00000     | 1.00000     |
| Amino Acid CC_02        | Std.        | 2     | 2.150    | 751026  | 0.9995873      | 0.2123  | mg/kg | 111.87      | 1.00000     | 1.00000     |
| Amino Acid CC_03        | Std.        | 3     | 2.150    | 1304862 | 0.9995873      | 0.3834  | mg/kg | 101.00      | 1.00000     | 1.00000     |
| Amino Acid CC_04        | Std.        | 4     | 2.150    | 2489707 | 0.9995873      | 0.7494  | mg/kg | 98.71       | 1.00000     | 1.00000     |
| Amino Acid CC_05        | Std.        | 5     | 2.150    | 6211916 | 0.9995873      | 1.8992  | mg/kg | 100.06      | 1.00000     | 1.00000     |
| Ulva Seaweeds Sample_01 | Unk.        | ----  | 2.150    | 56299   | 0.9995873      | -2.2521 | mg/kg | ----        | 0.10000     | 100.00000   |
| Ulva Seaweeds Sample_02 | Unk.        | ----  | 2.150    | 58534   | 0.9995873      | -1.5617 | mg/kg | ----        | 0.10000     | 100.00000   |
| Ulva Seaweeds Sample_03 | Unk.        | ----  | 2.150    | 80128   | 0.9995873      | 5.1085  | mg/kg | ----        | 0.10000     | 100.00000   |
| Ulva Seaweeds Sample_04 | Unk.        | ----  | 2.150    | 73081   | 0.9995873      | 2.9315  | mg/kg | ----        | 0.10000     | 100.00000   |

**Amino Acid CC\_01**

Conc. 0.0014

Area 68037

R#1 156.20&gt;83.30 33.35 (30.40)

Q 156.40&gt;110.30 (+)

7.02e3

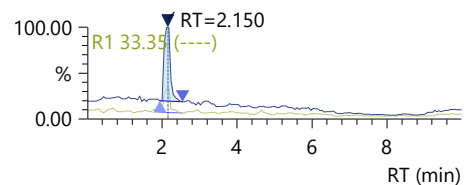**Amino Acid CC\_02**

Conc. 0.2123

Area 751026

R#1 156.20&gt;83.30 29.53 (30.40)

Q 156.40&gt;110.30 (+)

7.66e4

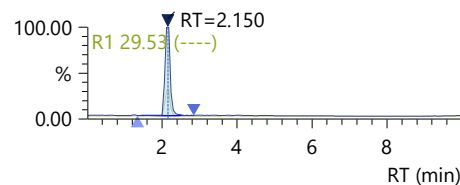**Amino Acid CC\_03**

Conc. 0.3834

Area 1304862

R#1 156.20&gt;83.30 29.50 (30.40)

Q 156.40&gt;110.30 (+)

1.33e5

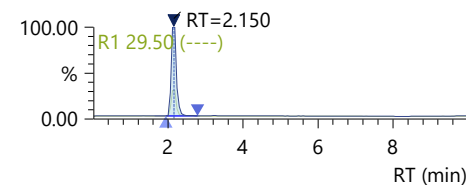**Amino Acid CC\_04**

Conc. 0.7494

Area 2489707

R#1 156.20&gt;83.30 29.94 (30.40)

Q 156.40&gt;110.30 (+)

2.59e5

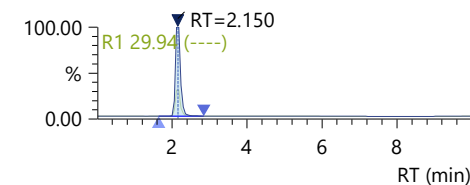

**Compound: Histidine (continued)****Amino Acid CC\_05**

Conc. 1.8992

Area 6211916

R#1 156.20&gt;83.30 29.68 (30.40)

Q 156.40&gt;110.30 (+)

6.16e5

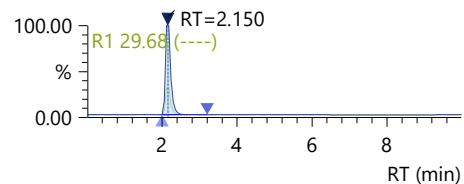**Ulva Seaweeds Sample\_01**

Conc. -2.2521

Area 56299

R#1 156.20&gt;83.30 44.09 (30.40)

Q 156.40&gt;110.30 (+)

5.70e3

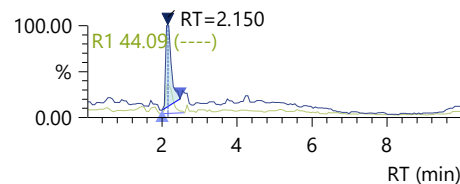**Ulva Seaweeds Sample\_02**

Conc. -1.5617

Area 58534

R#1 156.20&gt;83.30 43.79 (30.40)

Q 156.40&gt;110.30 (+)

5.89e3

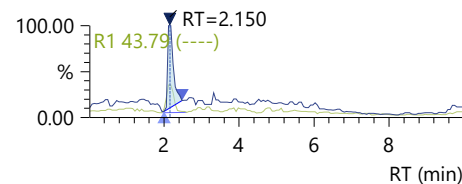**Ulva Seaweeds Sample\_03**

Conc. 5.1085

Area 80128

R#1 156.20&gt;83.30 26.27 (30.40)

Q 156.40&gt;110.30 (+)

6.79e3

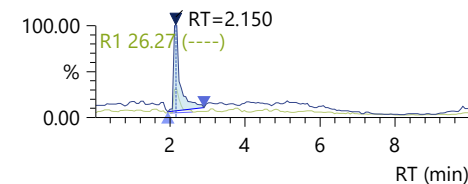**Ulva Seaweeds Sample\_04**

Conc. 2.9315

Area 73081

R#1 156.20&gt;83.30 34.26 (30.40)

Q 156.40&gt;110.30 (+)

6.79e3

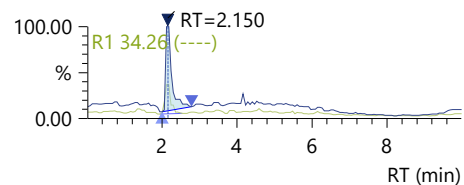**Compound: Isoleucine**

Curve Fit: Linear | Weighting: None | Zero: Not Forced

Quantitative Method: External Standard

Q 132.40&gt;86.30

 $R^2 = 0.9987933$   $R = 0.9993965$  $y = 11105550x - 221863.8$ 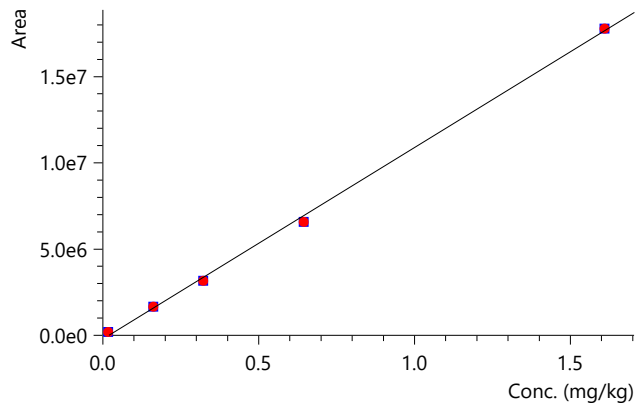

## Compound: Isoleucine (continued)

| Sample Name             | Sample Type | Level | Found RT | Area     | R <sup>2</sup> | Conc.    | Unit  | Accuracy(%) | Sample Amt. | Dil. Factor |
|-------------------------|-------------|-------|----------|----------|----------------|----------|-------|-------------|-------------|-------------|
| Amino Acid CC_01        | Std.        | 1     | 4.677    | 211419   | 0.9987933      | 0.0390   | mg/kg | 242.51      | 1.00000     | 1.00000     |
| Amino Acid CC_02        | Std.        | 2     | 4.677    | 1664149  | 0.9987933      | 0.1698   | mg/kg | 105.56      | 1.00000     | 1.00000     |
| Amino Acid CC_03        | Std.        | 3     | 4.737    | 3173965  | 0.9987933      | 0.3058   | mg/kg | 95.03       | 1.00000     | 1.00000     |
| Amino Acid CC_04        | Std.        | 4     | 4.737    | 6592128  | 0.9987933      | 0.6136   | mg/kg | 95.35       | 1.00000     | 1.00000     |
| Amino Acid CC_05        | Std.        | 5     | 4.737    | 17800585 | 0.9987933      | 1.6228   | mg/kg | 100.87      | 1.00000     | 1.00000     |
| Ulva Seaweeds Sample_01 | Unk.        | ----  | 4.737    | 3691981  | 0.9987933      | 352.4226 | mg/kg | ----        | 0.10000     | 100.00000   |
| Ulva Seaweeds Sample_02 | Unk.        | ----  | 4.737    | 4188956  | 0.9987933      | 397.1727 | mg/kg | ----        | 0.10000     | 100.00000   |
| Ulva Seaweeds Sample_03 | Unk.        | ----  | 4.737    | 2176771  | 0.9987933      | 215.9853 | mg/kg | ----        | 0.10000     | 100.00000   |
| Ulva Seaweeds Sample_04 | Unk.        | ----  | 4.737    | 1982022  | 0.9987933      | 198.4491 | mg/kg | ----        | 0.10000     | 100.00000   |

## Amino Acid CC\_01

Conc. 0.0390

Area 211419

R#1 132.40&gt;69.20 15.92 (15.34)

Q 132.40&gt;86.30 (+)

2.53e4

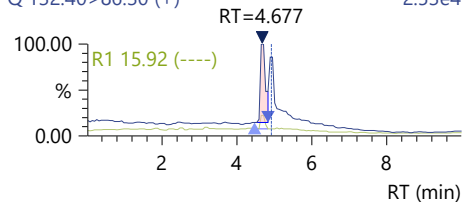

## Amino Acid CC\_02

Conc. 0.1698

Area 1664149

R#1 132.40&gt;69.20 15.63 (15.34)

Q 132.40&gt;86.30 (+)

2.39e5

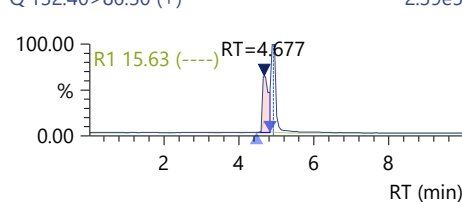

## Amino Acid CC\_03

Conc. 0.3058

Area 3173965

R#1 132.40&gt;69.20 15.77 (15.34)

Q 132.40&gt;86.30 (+)

5.17e5

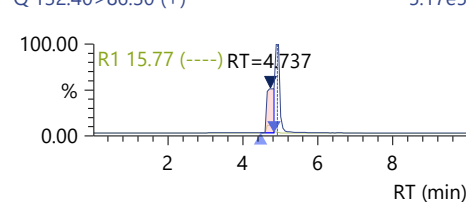

## Amino Acid CC\_04

Conc. 0.6136

Area 6592128

R#1 132.40&gt;69.20 14.94 (15.34)

Q 132.40&gt;86.30 (+)

8.32e5

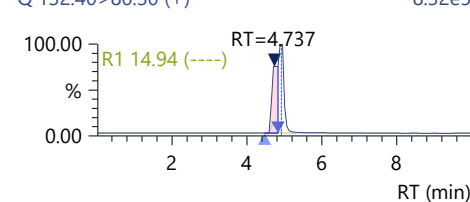

## Amino Acid CC\_05

Conc. 1.6228

Area 17800585

R#1 132.40&gt;69.20 14.42 (15.34)

Q 132.40&gt;86.30 (+)

1.99e6

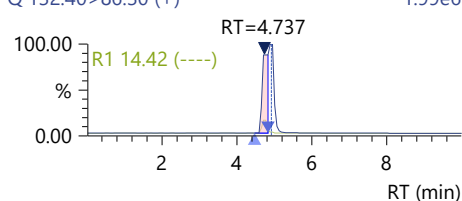

## Ulva Seaweeds Sample\_01

Conc. 352.4226

Area 3691981

R#1 132.40&gt;69.20 12.05 (15.34)

Q 132.40&gt;86.30 (+)

2.67e5

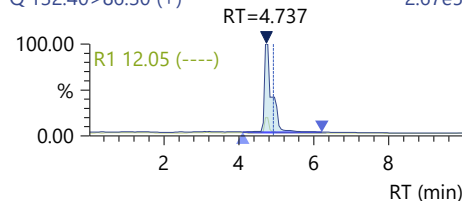

## Ulva Seaweeds Sample\_02

Conc. 397.1727

Area 4188956

R#1 132.40&gt;69.20 11.35 (15.34)

Q 132.40&gt;86.30 (+)

3.20e5

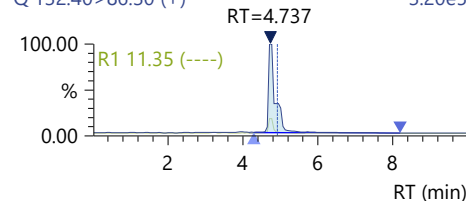

## Ulva Seaweeds Sample\_03

Conc. 215.9853

Area 2176771

R#1 132.40&gt;69.20 26.45 (15.34)

Q 132.40&gt;86.30 (+)

3.55e5

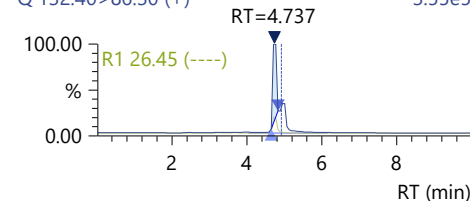

**Compound: Isoleucine (continued)****Ulva Seaweeds Sample\_04**

Conc. 198.4491

Area 1982022

R#1 132.40&gt;69.20 27.53 (15.34)

Q 132.40&gt;86.30 (+)

3.30e5

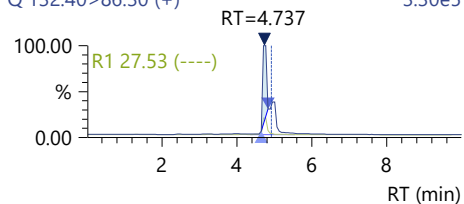**Compound: Leucine**

Curve Fit: Linear | Weighting: None | Zero: Not Forced

Quantitative Method: External Standard

Q 132.40&gt;86.30

 $R^2 = 0.9996953$   $R = 0.9998476$  $y = 17564610x - 421373.5$ 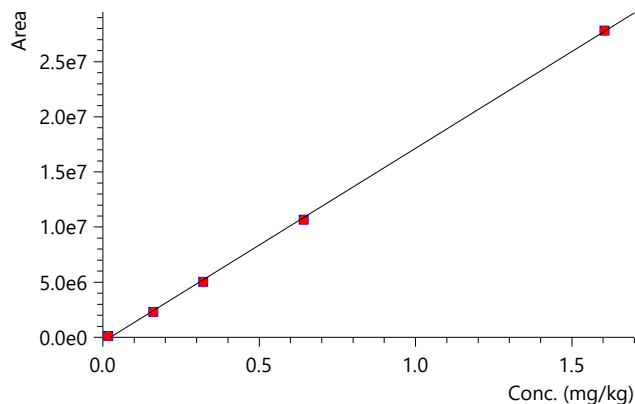

| Sample Name             | Sample Type | Level | Found RT | Area     | R <sup>2</sup> | Conc.    | Unit  | Accuracy(%) | Sample Amt. | Dil. Factor |
|-------------------------|-------------|-------|----------|----------|----------------|----------|-------|-------------|-------------|-------------|
| Amino Acid CC_01        | Std.        | 1     | 4.921    | 154869   | 0.9996953      | 0.0328   | mg/kg | 204.57      | 1.00000     | 1.00000     |
| Amino Acid CC_02        | Std.        | 2     | 4.921    | 2311272  | 0.9996953      | 0.1556   | mg/kg | 97.01       | 1.00000     | 1.00000     |
| Amino Acid CC_03        | Std.        | 3     | 4.921    | 5059499  | 0.9996953      | 0.3120   | mg/kg | 97.29       | 1.00000     | 1.00000     |
| Amino Acid CC_04        | Std.        | 4     | 4.921    | 10690087 | 0.9996953      | 0.6326   | mg/kg | 98.62       | 1.00000     | 1.00000     |
| Amino Acid CC_05        | Std.        | 5     | 4.921    | 27845546 | 0.9996953      | 1.6093   | mg/kg | 100.35      | 1.00000     | 1.00000     |
| Ulva Seaweeds Sample_01 | Unk.        | ----  | 4.741    | 4286201  | 0.9996953      | 268.0147 | mg/kg | ----        | 0.10000     | 100.00000   |
| Ulva Seaweeds Sample_02 | Unk.        | ----  | 4.741    | 4671020  | 0.9996953      | 289.9235 | mg/kg | ----        | 0.10000     | 100.00000   |
| Ulva Seaweeds Sample_03 | Unk.        | ----  | 4.741    | 2371297  | 0.9996953      | 158.9941 | mg/kg | ----        | 0.10000     | 100.00000   |
| Ulva Seaweeds Sample_04 | Unk.        | ----  | 4.741    | 2473906  | 0.9996953      | 164.8359 | mg/kg | ----        | 0.10000     | 100.00000   |

**Compound: Leucine (continued)****Amino Acid CC\_01**

Conc. 0.0328

Area 154869

R#1 132.40&gt;69.30 4.52 (2.91)

Q 132.40&gt;86.30 (+)

3.03e4

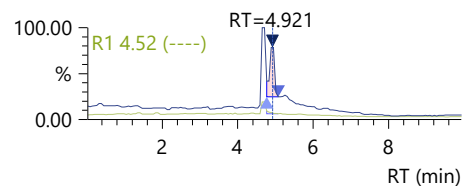**Amino Acid CC\_02**

Conc. 0.1556

Area 2311272

R#1 132.40&gt;69.30 2.25 (2.91)

Q 132.40&gt;86.30 (+)

2.49e5

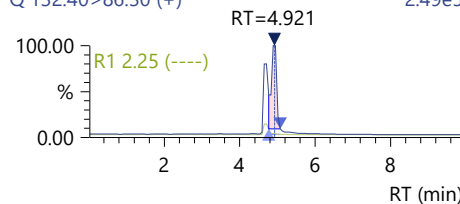**Amino Acid CC\_03**

Conc. 0.3120

Area 5059499

R#1 132.40&gt;69.30 2.34 (2.91)

Q 132.40&gt;86.30 (+)

5.22e5

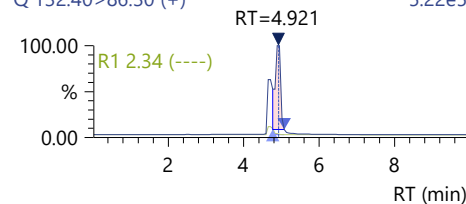**Amino Acid CC\_04**

Conc. 0.6326

Area 10690087

R#1 132.40&gt;69.30 2.63 (2.91)

Q 132.40&gt;86.30 (+)

1.03e6

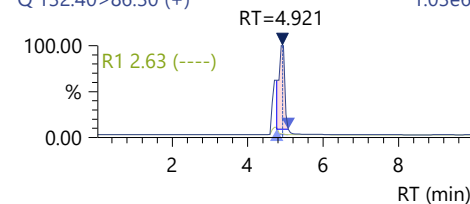**Amino Acid CC\_05**

Conc. 1.6093

Area 27845546

R#1 132.40&gt;69.30 2.79 (2.91)

Q 132.40&gt;86.30 (+)

2.55e6

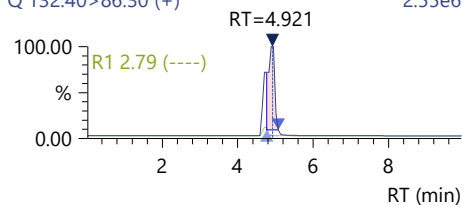**Ulva Seaweeds Sample\_01**

Conc. 268.0147

Area 4286201

R#1 132.40&gt;69.30 8.72 (2.91)

Q 132.40&gt;86.30 (+)

2.80e5

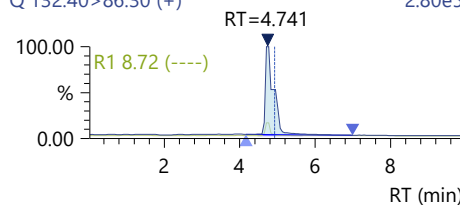**Ulva Seaweeds Sample\_02**

Conc. 289.9235

Area 4671020

R#1 132.40&gt;69.30 8.69 (2.91)

Q 132.40&gt;86.30 (+)

3.27e5

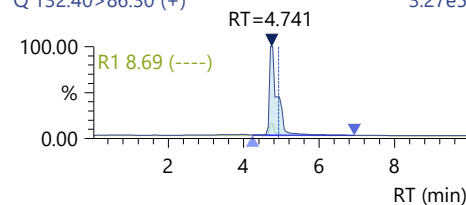**Ulva Seaweeds Sample\_03**

Conc. 158.9941

Area 2371297

R#1 132.40&gt;69.30 20.20 (2.91)

Q 132.40&gt;86.30 (+)

3.88e5

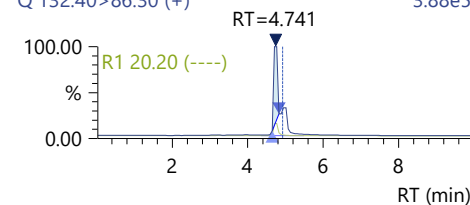**Ulva Seaweeds Sample\_04**

Conc. 164.8359

Area 2473906

R#1 132.40&gt;69.30 19.81 (2.91)

Q 132.40&gt;86.30 (+)

4.03e5

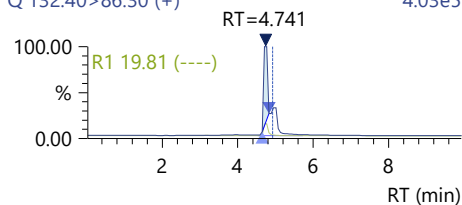

**Compound: Methionine**

Curve Fit: Linear | Weighting: None | Zero: Not Forced

Quantitative Method: External Standard

Q 150.20&gt;56.20

 $R^2 = 0.9995213$   $R = 0.9997606$  $y = 6227685x - 169682.9$ 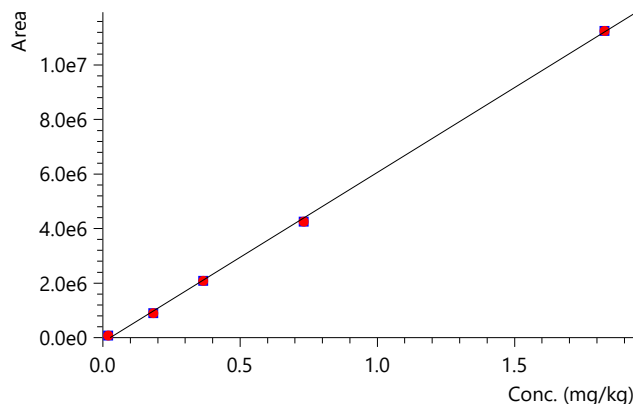

| Sample Name             | Sample Type | Level | Found RT | Area     | R <sup>2</sup> | Conc.   | Unit  | Accuracy(%) | Sample Amt. | Dil. Factor |
|-------------------------|-------------|-------|----------|----------|----------------|---------|-------|-------------|-------------|-------------|
| Amino Acid CC_01        | Std.        | 1     | 3.542    | 81669    | 0.9995213      | 0.0404  | mg/kg | 220.91      | 1.00000     | 1.00000     |
| Amino Acid CC_02        | Std.        | 2     | 3.542    | 909614   | 0.9995213      | 0.1733  | mg/kg | 94.86       | 1.00000     | 1.00000     |
| Amino Acid CC_03        | Std.        | 3     | 3.542    | 2087547  | 0.9995213      | 0.3625  | mg/kg | 99.19       | 1.00000     | 1.00000     |
| Amino Acid CC_04        | Std.        | 4     | 3.542    | 4266800  | 0.9995213      | 0.7124  | mg/kg | 97.48       | 1.00000     | 1.00000     |
| Amino Acid CC_05        | Std.        | 5     | 3.542    | 11262395 | 0.9995213      | 1.8357  | mg/kg | 100.47      | 1.00000     | 1.00000     |
| Ulva Seaweeds Sample_01 | Unk.        | ----  | 3.567    | 6621     | 0.9995213      | 28.3096 | mg/kg | ----        | 0.10000     | 100.00000   |
| Ulva Seaweeds Sample_02 | Unk.        | ----  | 4.744    | 5130     | 0.9995213      | 28.0703 | mg/kg | ----        | 0.10000     | 100.00000   |
| Ulva Seaweeds Sample_03 | Unk.        | ----  | 1.920    | 10004    | 0.9995213      | 28.8529 | mg/kg | ----        | 0.10000     | 100.00000   |
| Ulva Seaweeds Sample_04 | Unk.        | ----  | 1.760    | 13631    | 0.9995213      | 29.4352 | mg/kg | ----        | 0.10000     | 100.00000   |

**Amino Acid CC\_01**

Conc. 0.0404

Area 81669

R#1 150.30&gt;104.20 93.62 (0.00)

Q 150.20&gt;56.20 (+)

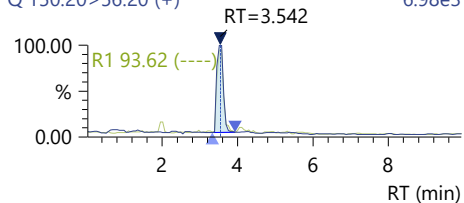**Amino Acid CC\_02**

Conc. 0.1733

Area 909614

R#1 150.30&gt;104.20 87.68 (0.00)

Q 150.20&gt;56.20 (+)

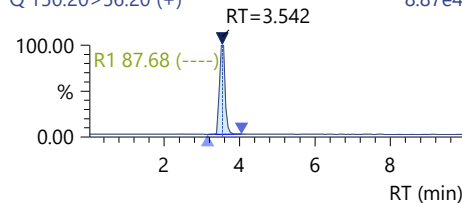**Amino Acid CC\_03**

Conc. 0.3625

Area 2087547

R#1 150.30&gt;104.20 85.19 (0.00)

Q 150.20&gt;56.20 (+)

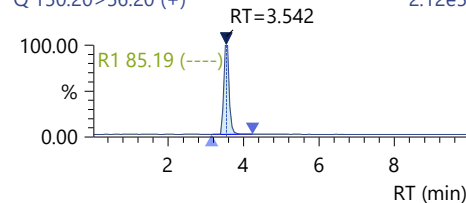**Amino Acid CC\_04**

Conc. 0.7124

Area 4266800

R#1 150.30&gt;104.20 84.85 (0.00)

Q 150.20&gt;56.20 (+)

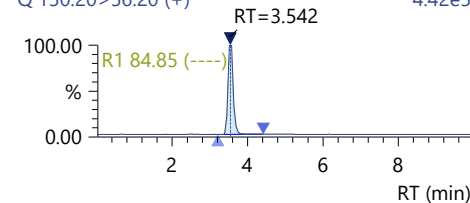



**Compound: Methionine (continued)****Amino Acid CC\_05**

Conc. 1.8357

Area 11262395

R#1 150.30&gt;104.20 87.19 (0.00)

Q 150.20&gt;56.20 (+)

1.17e6

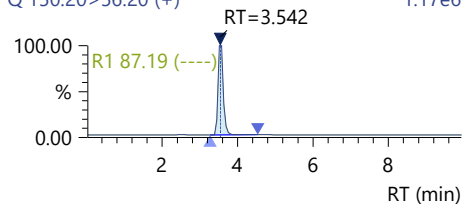**Ulva Seaweeds Sample\_01**

Conc. 28.3096

Area 6621

R#1 150.30&gt;104.20 0.00 (0.00)

Q 150.20&gt;56.20 (+)

6.10e2

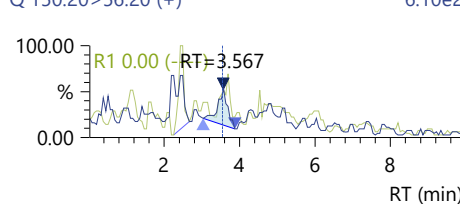**Ulva Seaweeds Sample\_02**

Conc. 28.0703

Area 5130

R#1 150.30&gt;104.20 0.00 (0.00)

Q 150.20&gt;56.20 (+)

7.78e2

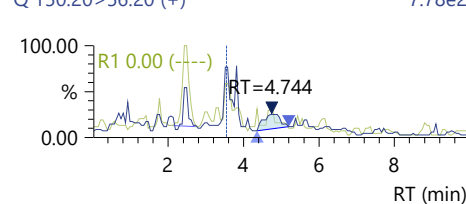**Ulva Seaweeds Sample\_03**

Conc. 28.8529

Area 10004

R#1 150.30&gt;104.20 0.00 (0.00)

Q 150.20&gt;56.20 (+)

9.15e2

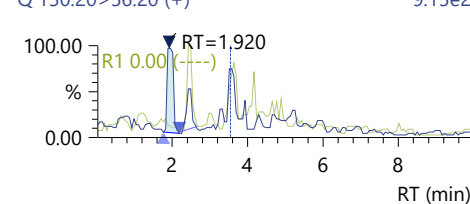**Ulva Seaweeds Sample\_04**

Conc. 29.4352

Area 13631

R#1 150.30&gt;104.20 0.00 (0.00)

Q 150.20&gt;56.20 (+)

1.88e3

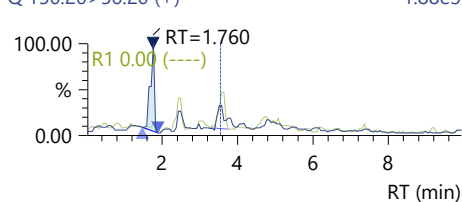**Compound: Phenylalanine**

Curve Fit: Linear | Weighting: None | Zero: Not Forced

Quantitative Method: External Standard

Q 166.40&gt;120.20

R<sup>2</sup> = 0.9953500 R = 0.9976723

y = 15132040x + 177694.1

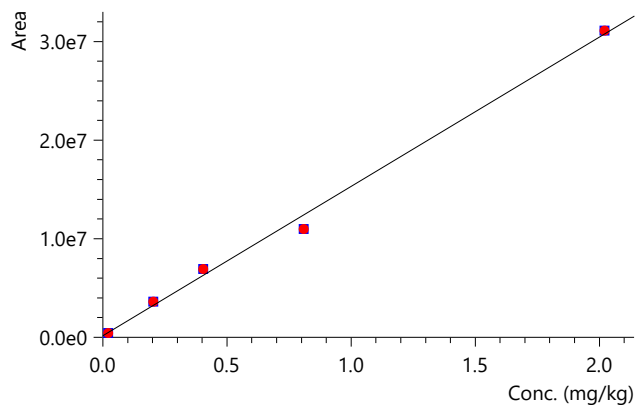

## Compound: Phenylalanine (continued)

| Sample Name             | Sample Type | Level | Found RT | Area     | R <sup>2</sup> | Conc.   | Unit  | Accuracy(%) | Sample Amt. | Dil. Factor |
|-------------------------|-------------|-------|----------|----------|----------------|---------|-------|-------------|-------------|-------------|
| Amino Acid CC_01        | Std.        | 1     | 5.529    | 452824   | 0.9953500      | 0.0182  | mg/kg | 90.02       | 1.00000     | 1.00000     |
| Amino Acid CC_02        | Std.        | 2     | 5.529    | 3634896  | 0.9953500      | 0.2285  | mg/kg | 113.11      | 1.00000     | 1.00000     |
| Amino Acid CC_03        | Std.        | 3     | 5.529    | 6936485  | 0.9953500      | 0.4467  | mg/kg | 110.57      | 1.00000     | 1.00000     |
| Amino Acid CC_04        | Std.        | 4     | 5.529    | 10991605 | 0.9953500      | 0.7146  | mg/kg | 88.45       | 1.00000     | 1.00000     |
| Amino Acid CC_05        | Std.        | 5     | 5.529    | 31138115 | 0.9953500      | 2.0460  | mg/kg | 101.30      | 1.00000     | 1.00000     |
| Ulva Seaweeds Sample_01 | Unk.        | ----  | 5.529    | 1241591  | 0.9953500      | 70.3076 | mg/kg | ----        | 0.10000     | 100.00000   |
| Ulva Seaweeds Sample_02 | Unk.        | ----  | 5.529    | 1354990  | 0.9953500      | 77.8015 | mg/kg | ----        | 0.10000     | 100.00000   |
| Ulva Seaweeds Sample_03 | Unk.        | ----  | 5.589    | 1090174  | 0.9953500      | 60.3012 | mg/kg | ----        | 0.10000     | 100.00000   |
| Ulva Seaweeds Sample_04 | Unk.        | ----  | 5.589    | 1006682  | 0.9953500      | 54.7836 | mg/kg | ----        | 0.10000     | 100.00000   |

## Amino Acid CC\_01

Conc. 0.0182

Area 452824

R#1 166.40&gt;103.20 21.88 (27.96)

Q 166.40&gt;120.20 (+)

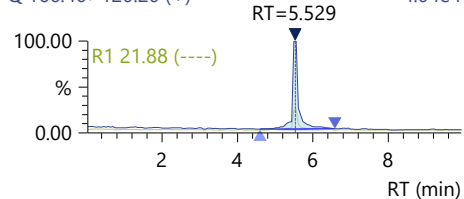

## Amino Acid CC\_02

Conc. 0.2285

Area 3634896

R#1 166.40&gt;103.20 27.93 (27.96)

Q 166.40&gt;120.20 (+)

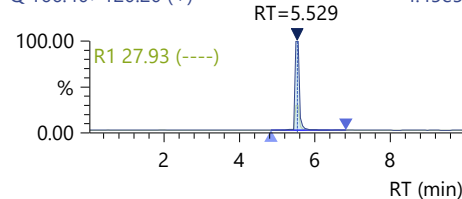

## Amino Acid CC\_03

Conc. 0.4467

Area 6936485

R#1 166.40&gt;103.20 27.94 (27.96)

Q 166.40&gt;120.20 (+)

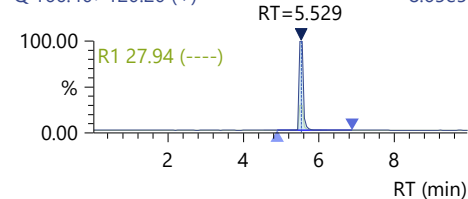

## Amino Acid CC\_04

Conc. 0.7146

Area 10991605

R#1 166.40&gt;103.20 31.46 (27.96)

Q 166.40&gt;120.20 (+)

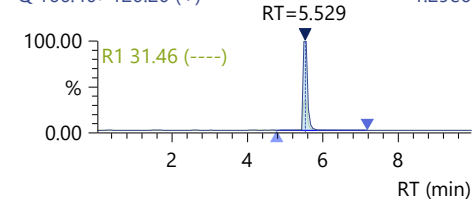

## Amino Acid CC\_05

Conc. 2.0460

Area 31138115

R#1 166.40&gt;103.20 30.57 (27.96)

Q 166.40&gt;120.20 (+)

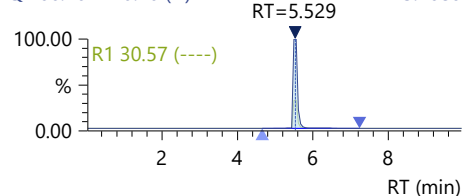

## Ulva Seaweeds Sample\_01

Conc. 70.3076

Area 1241591

R#1 166.40&gt;103.20 27.21 (27.96)

Q 166.40&gt;120.20 (+)

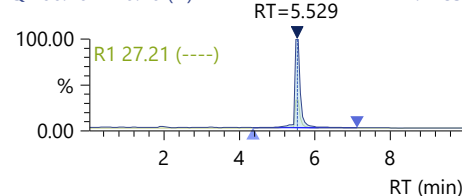

## Ulva Seaweeds Sample\_02

Conc. 77.8015

Area 1354990

R#1 166.40&gt;103.20 32.47 (27.96)

Q 166.40&gt;120.20 (+)

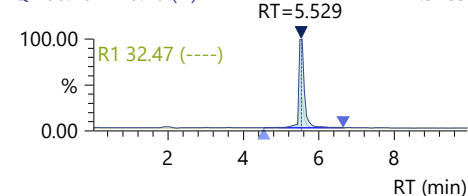

## Ulva Seaweeds Sample\_03

Conc. 60.3012

Area 1090174

R#1 166.40&gt;103.20 29.03 (27.96)

Q 166.40&gt;120.20 (+)

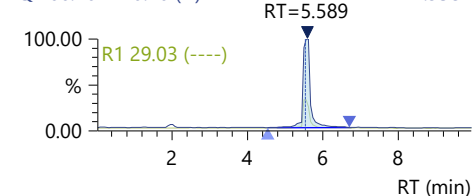

**Compound: Phenylalanine (continued)****Ulva Seaweeds Sample\_04**

Conc. 54.7836

Area 1006682

R#1 166.40&gt;103.20 31.96 (27.96)

Q 166.40&gt;120.20 (+)

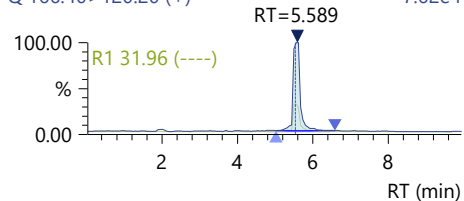**Compound: Proline**

Curve Fit: Linear | Weighting: None | Zero: Not Forced

Quantitative Method: External Standard

Q 116.30&gt;70.20

 $R^2 = 0.9778298$   $R = 0.9888528$  $y = 14309590x + 951867.2$ 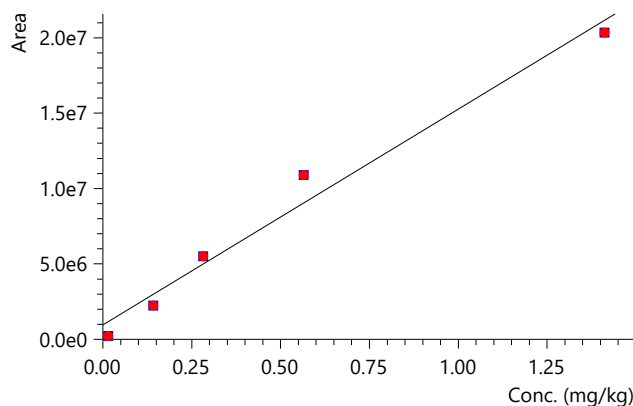

| Sample Name             | Sample Type | Level | Found RT | Area     | R <sup>2</sup> | Conc.   | Unit  | Accuracy(%) | Sample Amt. | Dil. Factor |
|-------------------------|-------------|-------|----------|----------|----------------|---------|-------|-------------|-------------|-------------|
| Amino Acid CC_01        | Std.        | 1     | 2.588    | 232667   | 0.9778298      | -0.0503 | mg/kg | -356.24     | 1.00000     | 1.00000     |
| Amino Acid CC_02        | Std.        | 2     | 2.588    | 2255277  | 0.9778298      | 0.0911  | mg/kg | 64.56       | 1.00000     | 1.00000     |
| Amino Acid CC_03        | Std.        | 3     | 2.588    | 5526148  | 0.9778298      | 0.3197  | mg/kg | 113.29      | 1.00000     | 1.00000     |
| Amino Acid CC_04        | Std.        | 4     | 2.588    | 10905010 | 0.9778298      | 0.6956  | mg/kg | 123.25      | 1.00000     | 1.00000     |
| Amino Acid CC_05        | Std.        | 5     | 2.588    | 20363044 | 0.9778298      | 1.3565  | mg/kg | 96.15       | 1.00000     | 1.00000     |
| Ulva Seaweeds Sample_01 | Unk.        | ----  | 2.588    | 2277185  | 0.9778298      | 92.6175 | mg/kg | ----        | 0.10000     | 100.00000   |
| Ulva Seaweeds Sample_02 | Unk.        | ----  | 2.588    | 2124243  | 0.9778298      | 81.9294 | mg/kg | ----        | 0.10000     | 100.00000   |
| Ulva Seaweeds Sample_03 | Unk.        | ----  | 2.588    | 1925330  | 0.9778298      | 68.0287 | mg/kg | ----        | 0.10000     | 100.00000   |
| Ulva Seaweeds Sample_04 | Unk.        | ----  | 2.588    | 1913098  | 0.9778298      | 67.1739 | mg/kg | ----        | 0.10000     | 100.00000   |

**Compound: Proline (continued)****Amino Acid CC\_01**

Conc. -0.0503

Area 232667

R#1 116.30&gt;43.30 4.70 (3.30)

Q 116.30&gt;70.20 (+)

2.73e4

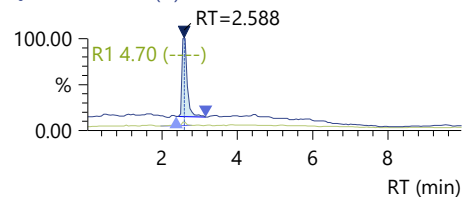**Amino Acid CC\_02**

Conc. 0.0911

Area 2255277

R#1 116.30&gt;43.30 3.18 (3.30)

Q 116.30&gt;70.20 (+)

2.48e5

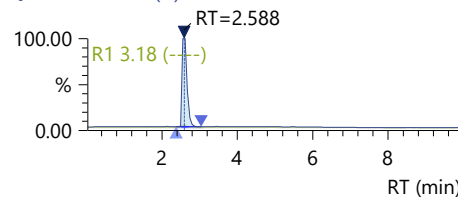**Amino Acid CC\_03**

Conc. 0.3197

Area 5526148

R#1 116.30&gt;43.30 2.93 (3.30)

Q 116.30&gt;70.20 (+)

5.91e5

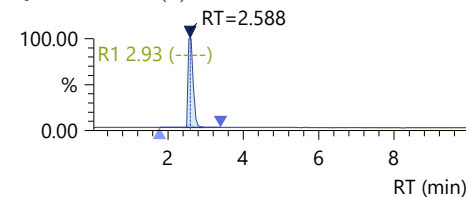**Amino Acid CC\_04**

Conc. 0.6956

Area 10905010

R#1 116.30&gt;43.30 2.90 (3.30)

Q 116.30&gt;70.20 (+)

1.13e6

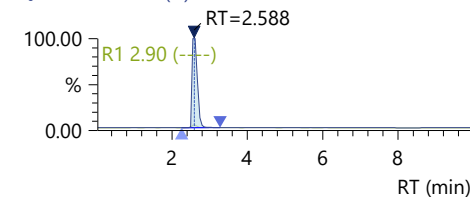**Amino Acid CC\_05**

Conc. 1.3565

Area 20363044

R#1 116.30&gt;43.30 2.77 (3.30)

Q 116.30&gt;70.20 (+)

1.85e6

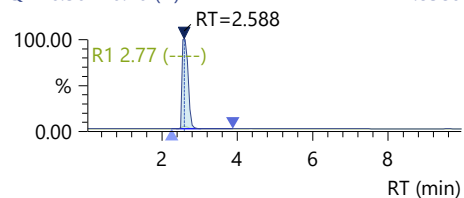**Ulva Seaweeds Sample\_01**

Conc. 92.6175

Area 2277185

R#1 116.30&gt;43.30 3.03 (3.30)

Q 116.30&gt;70.20 (+)

2.12e5

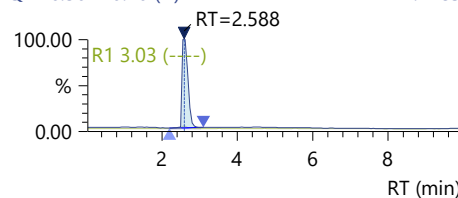**Ulva Seaweeds Sample\_02**

Conc. 81.9294

Area 2124243

R#1 116.30&gt;43.30 3.10 (3.30)

Q 116.30&gt;70.20 (+)

1.88e5

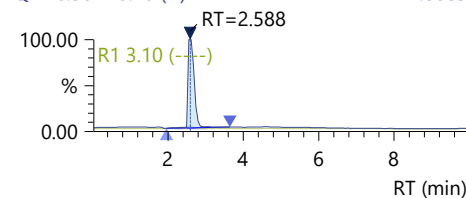**Ulva Seaweeds Sample\_03**

Conc. 68.0287

Area 1925330

R#1 116.30&gt;43.30 2.83 (3.30)

Q 116.30&gt;70.20 (+)

1.75e5

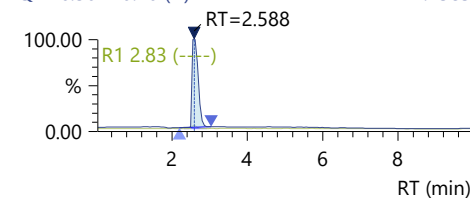**Ulva Seaweeds Sample\_04**

Conc. 67.1739

Area 1913098

R#1 116.30&gt;43.30 2.91 (3.30)

Q 116.30&gt;70.20 (+)

1.65e5

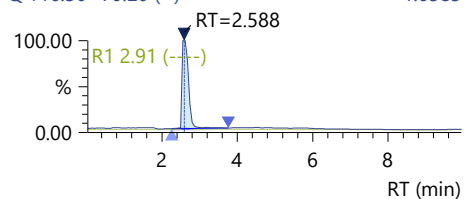

**Compound: Serine**

Curve Fit: Linear | Weighting: None | Zero: Not Forced

Quantitative Method: External Standard

Q 106.30&gt;60.20

 $R^2 = 0.9997919$   $R = 0.9998959$  $y = 6268796x + 57088.82$ 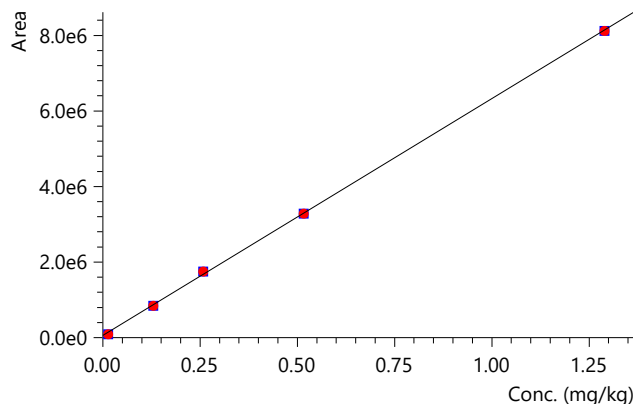

| Sample Name             | Sample Type | Level | Found RT | Area    | R <sup>2</sup> | Conc.   | Unit  | Accuracy(%) | Sample Amt. | Dil. Factor |
|-------------------------|-------------|-------|----------|---------|----------------|---------|-------|-------------|-------------|-------------|
| Amino Acid CC_01        | Std.        | 1     | 2.351    | 96567   | 0.9997919      | 0.0063  | mg/kg | 48.85       | 1.00000     | 1.00000     |
| Amino Acid CC_02        | Std.        | 2     | 2.351    | 845005  | 0.9997919      | 0.1257  | mg/kg | 97.50       | 1.00000     | 1.00000     |
| Amino Acid CC_03        | Std.        | 3     | 2.351    | 1752163 | 0.9997919      | 0.2704  | mg/kg | 104.88      | 1.00000     | 1.00000     |
| Amino Acid CC_04        | Std.        | 4     | 2.351    | 3282655 | 0.9997919      | 0.5145  | mg/kg | 99.79       | 1.00000     | 1.00000     |
| Amino Acid CC_05        | Std.        | 5     | 2.351    | 8127274 | 0.9997919      | 1.2874  | mg/kg | 99.87       | 1.00000     | 1.00000     |
| Ulva Seaweeds Sample_01 | Unk.        | ----  | 2.351    | 457669  | 0.9997919      | 63.9007 | mg/kg | ----        | 0.10000     | 100.00000   |
| Ulva Seaweeds Sample_02 | Unk.        | ----  | 2.351    | 467089  | 0.9997919      | 65.4033 | mg/kg | ----        | 0.10000     | 100.00000   |
| Ulva Seaweeds Sample_03 | Unk.        | ----  | 2.351    | 446429  | 0.9997919      | 62.1076 | mg/kg | ----        | 0.10000     | 100.00000   |
| Ulva Seaweeds Sample_04 | Unk.        | ----  | 2.411    | 435080  | 0.9997919      | 60.2973 | mg/kg | ----        | 0.10000     | 100.00000   |

**Amino Acid CC\_01**

Conc. 0.0063

Area 96567

R#1 106.30&gt;88.10 16.50 (10.96)

Q 106.30&gt;60.20 (+)

1.42e4

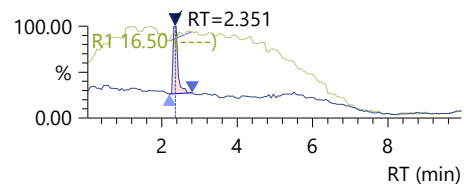**Amino Acid CC\_02**

Conc. 0.1257

Area 845005

R#1 106.30&gt;88.10 10.61 (10.96)

Q 106.30&gt;60.20 (+)

9.69e4

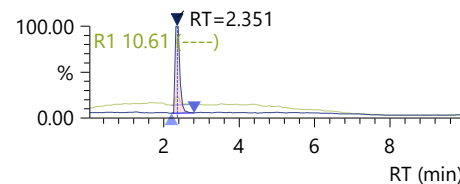**Amino Acid CC\_03**

Conc. 0.2704

Area 1752163

R#1 106.30&gt;88.10 8.97 (10.96)

Q 106.30&gt;60.20 (+)

1.97e5

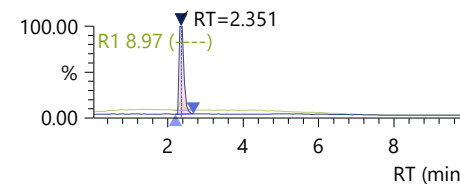**Amino Acid CC\_04**

Conc. 0.5145

Area 3282655

R#1 106.30&gt;88.10 9.43 (10.96)

Q 106.30&gt;60.20 (+)

3.59e5

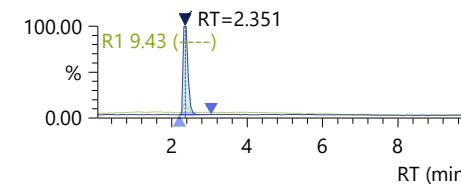

**Compound: Serine (continued)****Amino Acid CC\_05**

Conc. 1.2874

Area 8127274

R#1 106.30&gt;88.10 9.28 (10.96)

Q 106.30&gt;60.20 (+)

8.94e5

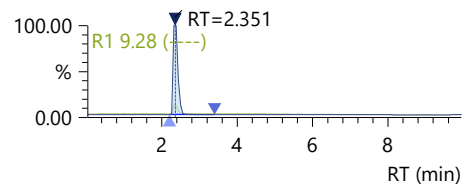**Ulva Seaweeds Sample\_01**

Conc. 63.9007

Area 457669

R#1 106.30&gt;88.10 21.54 (10.96)

Q 106.30&gt;60.20 (+)

4.15e4

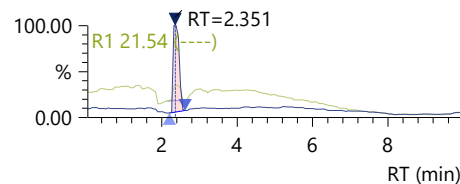**Ulva Seaweeds Sample\_02**

Conc. 65.4033

Area 467089

R#1 106.30&gt;88.10 0.00 (10.96)

Q 106.30&gt;60.20 (+)

4.12e4

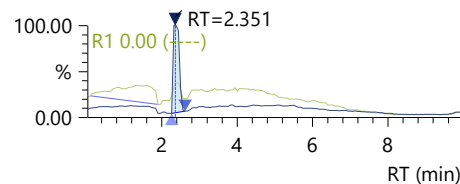**Ulva Seaweeds Sample\_03**

Conc. 62.1076

Area 446429

R#1 106.30&gt;88.10 0.00 (10.96)

Q 106.30&gt;60.20 (+)

3.94e4

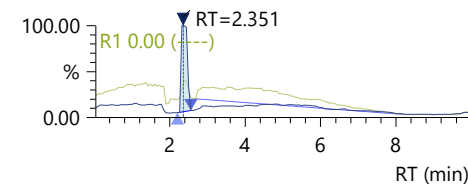**Ulva Seaweeds Sample\_04**

Conc. 60.2973

Area 435080

R#1 106.30&gt;88.10 0.00 (10.96)

Q 106.30&gt;60.20 (+)

3.97e4

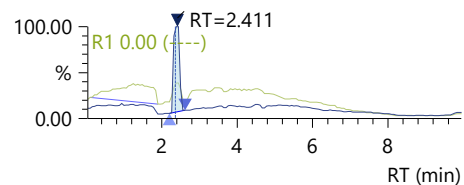**Compound: Threonine**

Curve Fit: Linear | Weighting: None | Zero: Not Forced

Quantitative Method: External Standard

Q 120.30&gt;74.20

 $R^2 = 0.9999553$   $R = 0.9999776$  $y = 3617310x - 11642.45$ 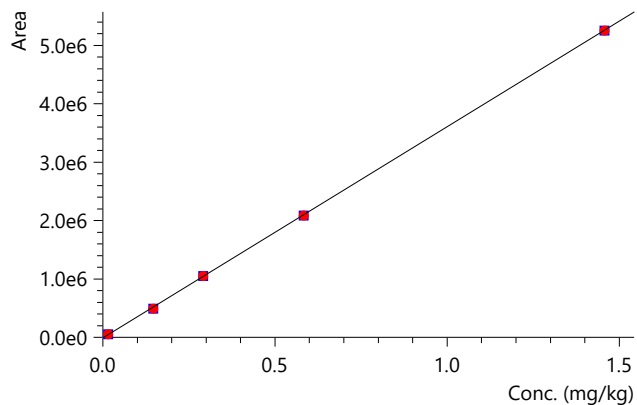

## Compound: Threonine (continued)

| Sample Name             | Sample Type | Level | Found RT | Area    | R <sup>2</sup> | Conc.   | Unit  | Accuracy(%) | Sample Amt. | Dil. Factor |
|-------------------------|-------------|-------|----------|---------|----------------|---------|-------|-------------|-------------|-------------|
| Amino Acid CC_01        | Std.        | 1     | 2.414    | 53523   | 0.9999553      | 0.0180  | mg/kg | 123.68      | 1.00000     | 1.00000     |
| Amino Acid CC_02        | Std.        | 2     | 2.415    | 494981  | 0.9999553      | 0.1401  | mg/kg | 96.16       | 1.00000     | 1.00000     |
| Amino Acid CC_03        | Std.        | 3     | 2.475    | 1054664 | 0.9999553      | 0.2948  | mg/kg | 101.19      | 1.00000     | 1.00000     |
| Amino Acid CC_04        | Std.        | 4     | 2.475    | 2088885 | 0.9999553      | 0.5807  | mg/kg | 99.67       | 1.00000     | 1.00000     |
| Amino Acid CC_05        | Std.        | 5     | 2.475    | 5259259 | 0.9999553      | 1.4571  | mg/kg | 100.04      | 1.00000     | 1.00000     |
| Ulva Seaweeds Sample_01 | Unk.        | ----  | 2.475    | 148155  | 0.9999553      | 44.1757 | mg/kg | ----        | 0.10000     | 100.00000   |
| Ulva Seaweeds Sample_02 | Unk.        | ----  | 2.475    | 148209  | 0.9999553      | 44.1906 | mg/kg | ----        | 0.10000     | 100.00000   |
| Ulva Seaweeds Sample_03 | Unk.        | ----  | 2.475    | 146013  | 0.9999553      | 43.5837 | mg/kg | ----        | 0.10000     | 100.00000   |
| Ulva Seaweeds Sample_04 | Unk.        | ----  | 2.475    | 140855  | 0.9999553      | 42.1576 | mg/kg | ----        | 0.10000     | 100.00000   |

## Amino Acid CC\_01

Conc. 0.0180

Area 53523

R#1 120.30&gt;56.20 82.25 (80.12)

Q 120.30&gt;74.20 (+)

5.70e3

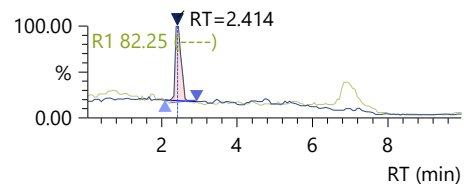

## Amino Acid CC\_02

Conc. 0.1401

Area 494981

R#1 120.30&gt;56.20 81.23 (80.12)

Q 120.30&gt;74.20 (+)

4.26e4

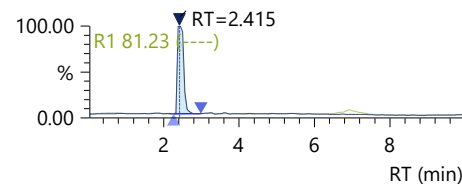

## Amino Acid CC\_03

Conc. 0.2948

Area 1054664

R#1 120.30&gt;56.20 79.86 (80.12)

Q 120.30&gt;74.20 (+)

8.93e4

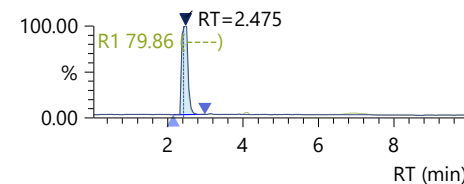

## Amino Acid CC\_04

Conc. 0.5807

Area 2088885

R#1 120.30&gt;56.20 78.14 (80.12)

Q 120.30&gt;74.20 (+)

1.86e5

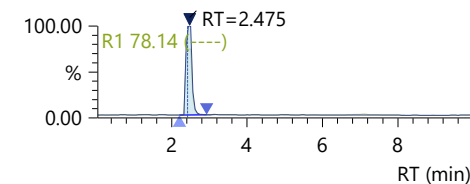

## Amino Acid CC\_05

Conc. 1.4571

Area 5259259

R#1 120.30&gt;56.20 79.12 (80.12)

Q 120.30&gt;74.20 (+)

4.99e5

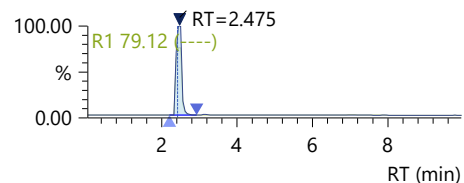

## Ulva Seaweeds Sample\_01

Conc. 44.1757

Area 148155

R#1 120.30&gt;56.20 75.61 (80.12)

Q 120.30&gt;74.20 (+)

1.38e4

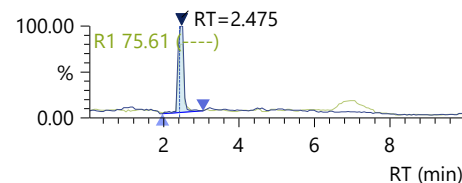

## Ulva Seaweeds Sample\_02

Conc. 44.1906

Area 148209

R#1 120.30&gt;56.20 76.64 (80.12)

Q 120.30&gt;74.20 (+)

1.43e4

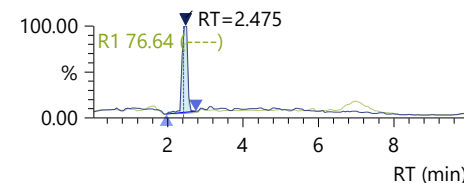

## Ulva Seaweeds Sample\_03

Conc. 43.5837

Area 146013

R#1 120.30&gt;56.20 71.67 (80.12)

Q 120.30&gt;74.20 (+)

1.50e4

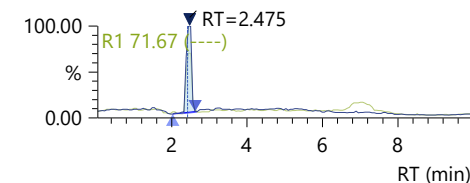

**Compound: Threonine (continued)****Ulva Seaweeds Sample\_04**

Conc. 42.1576

Area 140855

R#1 120.30&gt;56.20 76.42 (80.12)

Q 120.30&gt;74.20 (+)

1.47e4

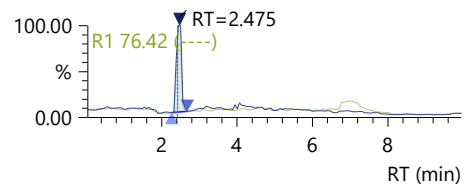**Compound: Tyrosine**

Curve Fit: Linear | Weighting: None | Zero: Not Forced

Quantitative Method: External Standard

Q 182.20&gt;136.30

 $R^2 = 0.9990769$   $R = 0.9995383$  $y = 3437685x - 145609.6$ 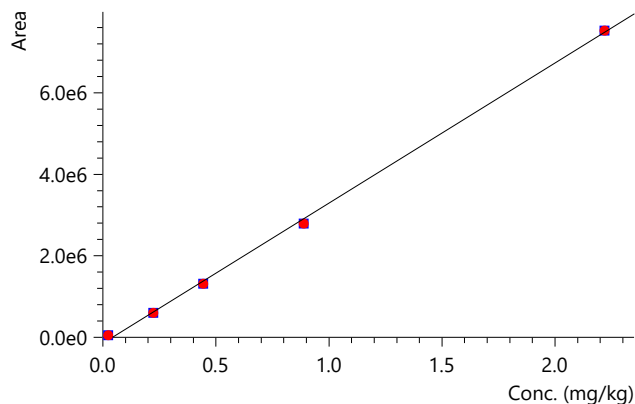

| Sample Name             | Sample Type | Level | Found RT | Area    | R <sup>2</sup> | Conc.     | Unit  | Accuracy(%) | Sample Amt. | Dil. Factor |
|-------------------------|-------------|-------|----------|---------|----------------|-----------|-------|-------------|-------------|-------------|
| Amino Acid CC_01        | Std.        | 1     | 4.281    | 53704   | 0.9990769      | 0.0580    | mg/kg | 261.43      | 1.00000     | 1.00000     |
| Amino Acid CC_02        | Std.        | 2     | 4.281    | 607111  | 0.9990769      | 0.2190    | mg/kg | 98.73       | 1.00000     | 1.00000     |
| Amino Acid CC_03        | Std.        | 3     | 4.281    | 1318796 | 0.9990769      | 0.4260    | mg/kg | 96.04       | 1.00000     | 1.00000     |
| Amino Acid CC_04        | Std.        | 4     | 4.281    | 2796006 | 0.9990769      | 0.8557    | mg/kg | 96.46       | 1.00000     | 1.00000     |
| Amino Acid CC_05        | Std.        | 5     | 4.281    | 7533459 | 0.9990769      | 2.2338    | mg/kg | 100.72      | 1.00000     | 1.00000     |
| Ulva Seaweeds Sample_01 | Unk.        | ----  | 4.281    | 3137057 | 0.9990769      | 954.9061  | mg/kg | ----        | 0.10000     | 100.00000   |
| Ulva Seaweeds Sample_02 | Unk.        | ----  | 4.281    | 3408145 | 0.9990769      | 1033.7640 | mg/kg | ----        | 0.10000     | 100.00000   |
| Ulva Seaweeds Sample_03 | Unk.        | ----  | 4.281    | 3568272 | 0.9990769      | 1080.3439 | mg/kg | ----        | 0.10000     | 100.00000   |
| Ulva Seaweeds Sample_04 | Unk.        | ----  | 4.281    | 3622571 | 0.9990769      | 1096.1390 | mg/kg | ----        | 0.10000     | 100.00000   |



**Compound: Tyrosine (continued)****Amino Acid CC\_01**

Conc. 0.0580

Area 53704

R#1 182.20&gt;165.10 78.86 (70.35)

Q 182.20&gt;136.30 (+) 4.65e3

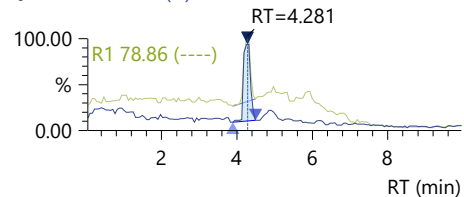**Amino Acid CC\_02**

Conc. 0.2190

Area 607111

R#1 182.20&gt;165.10 66.99 (70.35)

Q 182.20&gt;136.30 (+) 5.40e4

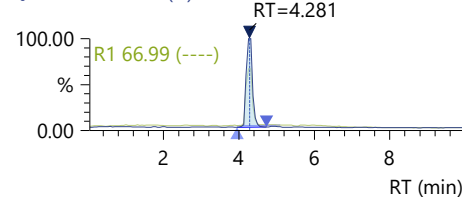**Amino Acid CC\_03**

Conc. 0.4260

Area 1318796

R#1 182.20&gt;165.10 68.93 (70.35)

Q 182.20&gt;136.30 (+) 1.26e5

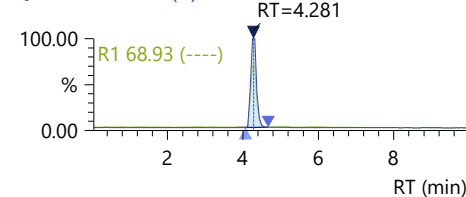**Amino Acid CC\_04**

Conc. 0.8557

Area 2796006

R#1 182.20&gt;165.10 68.65 (70.35)

Q 182.20&gt;136.30 (+) 2.67e5

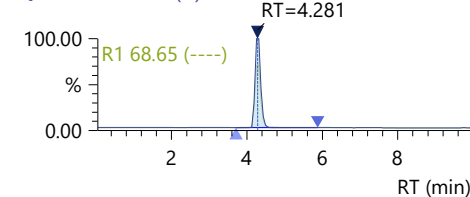**Amino Acid CC\_05**

Conc. 2.2338

Area 7533459

R#1 182.20&gt;165.10 68.35 (70.35)

Q 182.20&gt;136.30 (+) 7.49e5

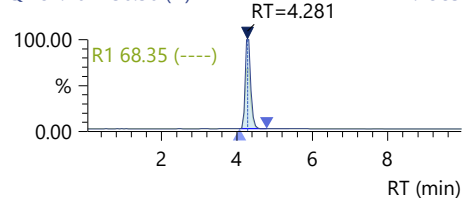**Ulva Seaweeds Sample\_01**

Conc. 954.9061

Area 3137057

R#1 182.20&gt;165.10 65.21 (70.35)

Q 182.20&gt;136.30 (+) 2.50e5

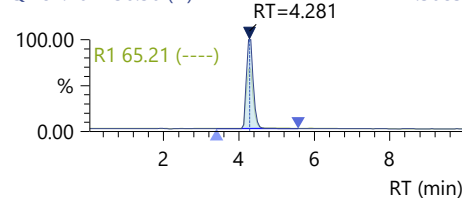**Ulva Seaweeds Sample\_02**

Conc. 1033.7640

Area 3408145

R#1 182.20&gt;165.10 67.55 (70.35)

Q 182.20&gt;136.30 (+) 2.71e5

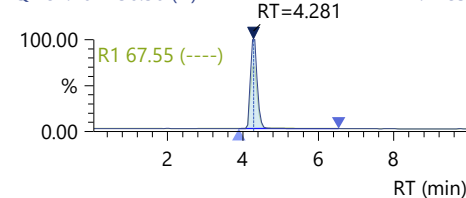**Ulva Seaweeds Sample\_03**

Conc. 1080.3439

Area 3568272

R#1 182.20&gt;165.10 66.54 (70.35)

Q 182.20&gt;136.30 (+) 2.87e5

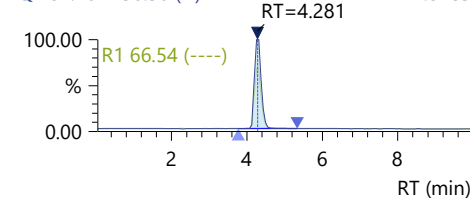**Ulva Seaweeds Sample\_04**

Conc. 1096.1390

Area 3622571

R#1 182.20&gt;165.10 66.20 (70.35)

Q 182.20&gt;136.30 (+) 2.84e5

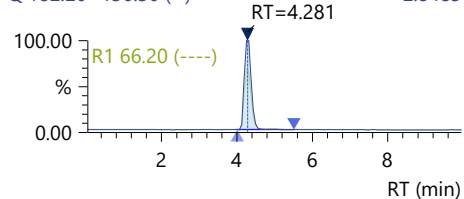

**Compound: Valine**

Curve Fit: Linear | Weighting: 1/C | Zero: Not Forced

Quantitative Method: External Standard

Q 118.40&gt;72.20

 $R^2 = 0.9954618$   $R = 0.9977283$  $y = 14914820x - 108319.2$ 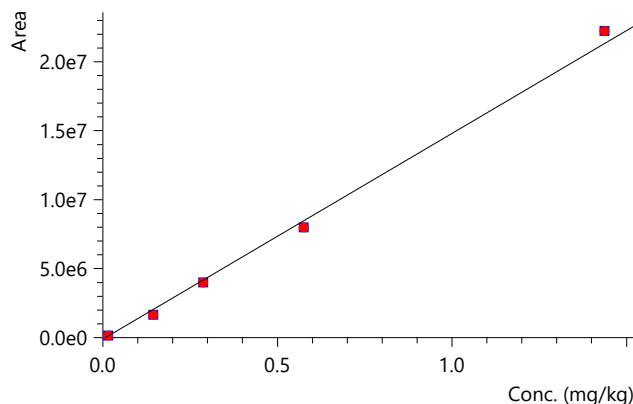

| Sample Name             | Sample Type | Level | Found RT | Area     | R <sup>2</sup> | Conc.    | Unit  | Accuracy(%) | Sample Amt. | Dil. Factor |
|-------------------------|-------------|-------|----------|----------|----------------|----------|-------|-------------|-------------|-------------|
| Amino Acid CC_01        | Std.        | 1     | 3.142    | 152985   | 0.9954618      | 0.0175   | mg/kg | 121.98      | 1.00000     | 1.00000     |
| Amino Acid CC_02        | Std.        | 2     | 3.142    | 1665971  | 0.9954618      | 0.1190   | mg/kg | 82.83       | 1.00000     | 1.00000     |
| Amino Acid CC_03        | Std.        | 3     | 3.142    | 4010451  | 0.9954618      | 0.2762   | mg/kg | 96.14       | 1.00000     | 1.00000     |
| Amino Acid CC_04        | Std.        | 4     | 3.142    | 8000140  | 0.9954618      | 0.5437   | mg/kg | 94.63       | 1.00000     | 1.00000     |
| Amino Acid CC_05        | Std.        | 5     | 3.142    | 22258997 | 0.9954618      | 1.4997   | mg/kg | 104.42      | 1.00000     | 1.00000     |
| Ulva Seaweeds Sample_01 | Unk.        | ----  | 3.202    | 2201642  | 0.9954618      | 154.8769 | mg/kg | ----        | 0.10000     | 100.00000   |
| Ulva Seaweeds Sample_02 | Unk.        | ----  | 3.202    | 2617738  | 0.9954618      | 182.7751 | mg/kg | ----        | 0.10000     | 100.00000   |
| Ulva Seaweeds Sample_03 | Unk.        | ----  | 3.202    | 2787433  | 0.9954618      | 194.1527 | mg/kg | ----        | 0.10000     | 100.00000   |
| Ulva Seaweeds Sample_04 | Unk.        | ----  | 3.202    | 2993469  | 0.9954618      | 207.9669 | mg/kg | ----        | 0.10000     | 100.00000   |

**Amino Acid CC\_01**

Conc. 0.0175

Area 152985

R#1 118.40&gt;55.10 43.87 (37.51)

Q 118.40&gt;72.20 (+)

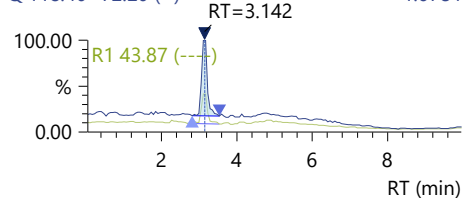**Amino Acid CC\_02**

Conc. 0.1190

Area 1665971

R#1 118.40&gt;55.10 37.82 (37.51)

Q 118.40&gt;72.20 (+)

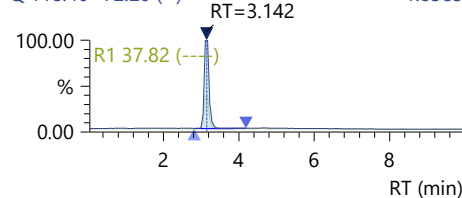**Amino Acid CC\_03**

Conc. 0.2762

Area 4010451

R#1 118.40&gt;55.10 35.18 (37.51)

Q 118.40&gt;72.20 (+)

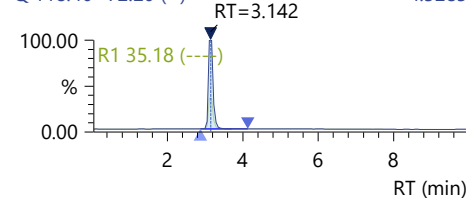**Amino Acid CC\_04**

Conc. 0.5437

Area 8000140

R#1 118.40&gt;55.10 36.02 (37.51)

Q 118.40&gt;72.20 (+)

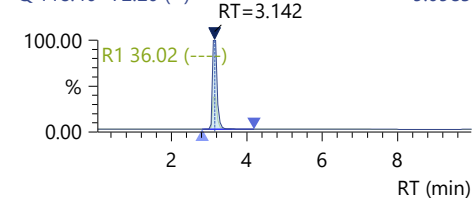

**Compound: Valine (continued)****Amino Acid CC\_05**

Conc. 1.4997

Area 22258997

R#1 118.40&gt;55.10 34.67 (37.51)

Q 118.40&gt;72.20 (+)

2.53e6

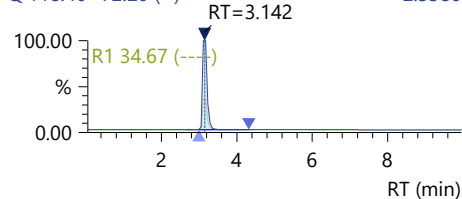**Ulva Seaweeds Sample\_01**

Conc. 154.8769

Area 2201642

R#1 118.40&gt;55.10 36.39 (37.51)

Q 118.40&gt;72.20 (+)

2.60e5

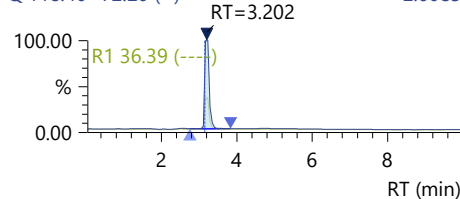**Ulva Seaweeds Sample\_02**

Conc. 182.7751

Area 2617738

R#1 118.40&gt;55.10 36.56 (37.51)

Q 118.40&gt;72.20 (+)

3.10e5

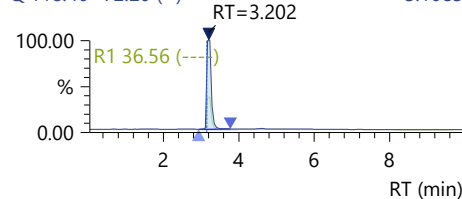**Ulva Seaweeds Sample\_03**

Conc. 194.1527

Area 2787433

R#1 118.40&gt;55.10 37.22 (37.51)

Q 118.40&gt;72.20 (+)

3.29e5

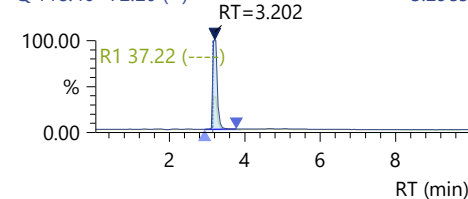**Ulva Seaweeds Sample\_04**

Conc. 207.9669

Area 2993469

R#1 118.40&gt;55.10 35.22 (37.51)

Q 118.40&gt;72.20 (+)

3.54e5

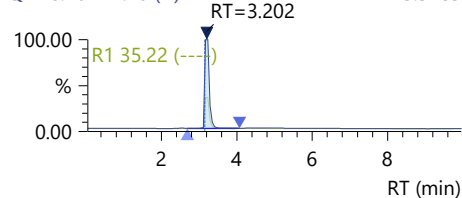**Compound: Lysine**

Curve Fit: Linear | Weighting: None | Zero: Not Forced

Quantitative Method: External Standard

Q 147.30&gt;84.30

 $R^2 = 0.9958486$   $R = 0.9979221$  $y = 4357194x + 356723.5$ 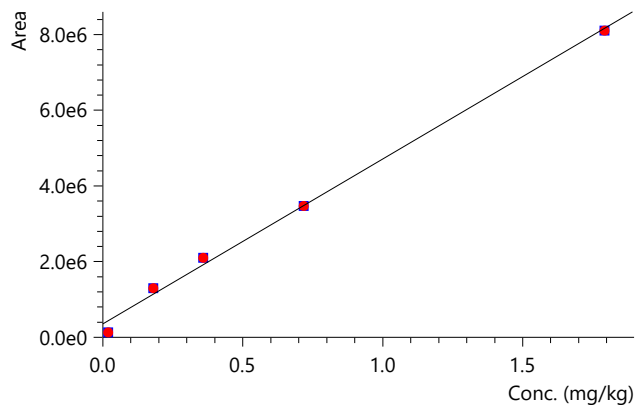

## Compound: Lysine (continued)

| Sample Name             | Sample Type | Level | Found RT | Area    | R <sup>2</sup> | Conc.    | Unit  | Accuracy(%) | Sample Amt. | Dil. Factor |
|-------------------------|-------------|-------|----------|---------|----------------|----------|-------|-------------|-------------|-------------|
| Amino Acid CC_01        | Std.        | 1     | 2.064    | 131586  | 0.9958486      | -0.0517  | mg/kg | -288.42     | 1.00000     | 1.00000     |
| Amino Acid CC_02        | Std.        | 2     | 2.064    | 1305682 | 0.9958486      | 0.2178   | mg/kg | 121.57      | 1.00000     | 1.00000     |
| Amino Acid CC_03        | Std.        | 3     | 2.064    | 2107777 | 0.9958486      | 0.4019   | mg/kg | 112.16      | 1.00000     | 1.00000     |
| Amino Acid CC_04        | Std.        | 4     | 2.064    | 3473591 | 0.9958486      | 0.7153   | mg/kg | 99.82       | 1.00000     | 1.00000     |
| Amino Acid CC_05        | Std.        | 5     | 2.064    | 8112970 | 0.9958486      | 1.7801   | mg/kg | 99.36       | 1.00000     | 1.00000     |
| Ulva Seaweeds Sample_01 | Unk.        | ----  | 2.124    | 190321  | 0.9958486      | -38.1904 | mg/kg | ----        | 0.10000     | 100.00000   |
| Ulva Seaweeds Sample_02 | Unk.        | ----  | 2.124    | 196348  | 0.9958486      | -36.8070 | mg/kg | ----        | 0.10000     | 100.00000   |
| Ulva Seaweeds Sample_03 | Unk.        | ----  | 2.124    | 222515  | 0.9958486      | -30.8016 | mg/kg | ----        | 0.10000     | 100.00000   |
| Ulva Seaweeds Sample_04 | Unk.        | ----  | 2.124    | 241746  | 0.9958486      | -26.3880 | mg/kg | ----        | 0.10000     | 100.00000   |

## Amino Acid CC\_01

Conc. -0.0517

Area 131586

R#1 147.40&gt;130.20 22.67 (25.61)

Q 147.30&gt;84.30 (+)

1.80e4

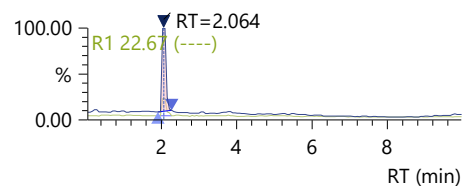

## Amino Acid CC\_02

Conc. 0.2178

Area 1305682

R#1 147.40&gt;130.20 25.85 (25.61)

Q 147.30&gt;84.30 (+)

1.51e5

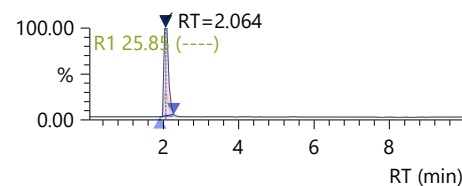

## Amino Acid CC\_03

Conc. 0.4019

Area 2107777

R#1 147.40&gt;130.20 27.48 (25.61)

Q 147.30&gt;84.30 (+)

2.36e5

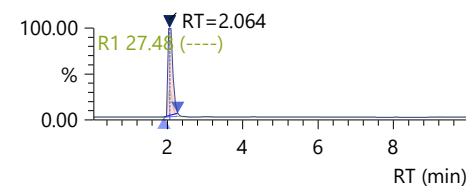

## Amino Acid CC\_04

Conc. 0.7153

Area 3473591

R#1 147.40&gt;130.20 27.16 (25.61)

Q 147.30&gt;84.30 (+)

3.74e5

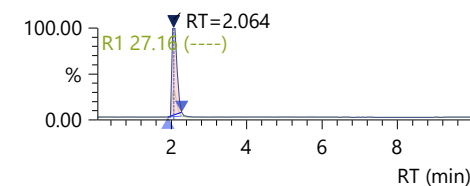

## Amino Acid CC\_05

Conc. 1.7801

Area 8112970

R#1 147.40&gt;130.20 26.79 (25.61)

Q 147.30&gt;84.30 (+)

8.77e5

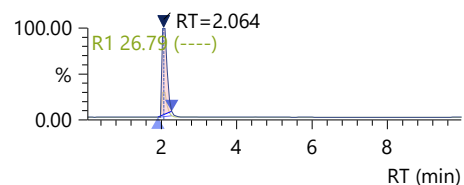

## Ulva Seaweeds Sample\_01

Conc. -38.1904

Area 190321

R#1 147.40&gt;130.20 26.14 (25.61)

Q 147.30&gt;84.30 (+)

3.32e4

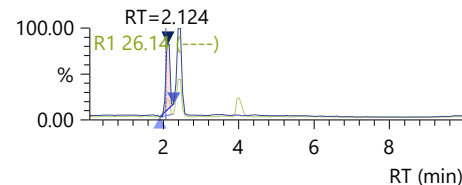

## Ulva Seaweeds Sample\_02

Conc. -36.8070

Area 196348

R#1 147.40&gt;130.20 29.11 (25.61)

Q 147.30&gt;84.30 (+)

3.65e4

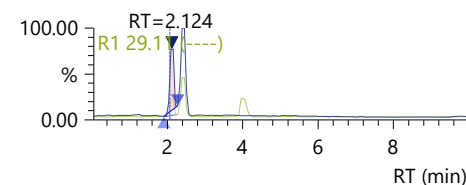

## Ulva Seaweeds Sample\_03

Conc. -30.8016

Area 222515

R#1 147.40&gt;130.20 28.10 (25.61)

Q 147.30&gt;84.30 (+)

3.68e4

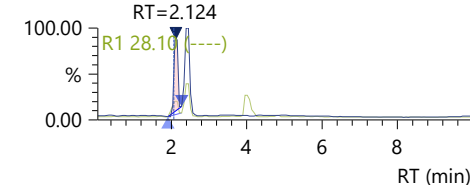

Compound: Lysine (continued)

Ulva Seaweeds Sample\_04

Conc. -26.3880

Area 241746

R#1 147.40>130.20 23.17 (25.61)

Q 147.30>84.30 (+) 3.93e4

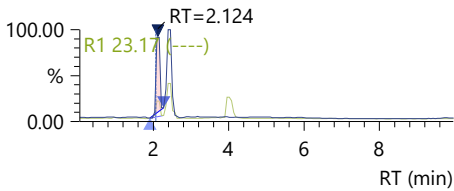

Supplement: Supplementary file 1 [file Amino Acid Sample Report.pdf › Amino Acid Sample Report.pdf]
