# Supplementary material
Source: Research Square preprint supplement (doi:10.21203/rs.3.rs-9674922/v1)

Method File: C:\Users\DELL\AppData\Local\Temp\tmp75C2.iprom

**ID1: Thiamine\_B1**

Curve Fit: Linear | Weighting: None | Zero: Not Forced

Quantitative Method: External Standard

Q 265.20>122.10

$R^2 = 0.9978688$   $R = 0.9989338$

$y = 179300.7x - 2164892$

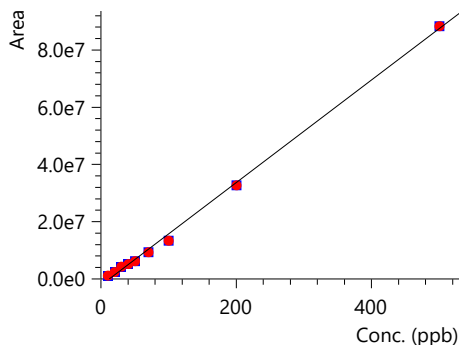

**ID2: Riboflavin\_B2**

Curve Fit: Linear | Weighting: None | Zero: Not Forced

Quantitative Method: External Standard

Q 377.30>243.05

$R^2 = 0.9997508$   $R = 0.9998754$

$y = 4537.113x - 8226.509$

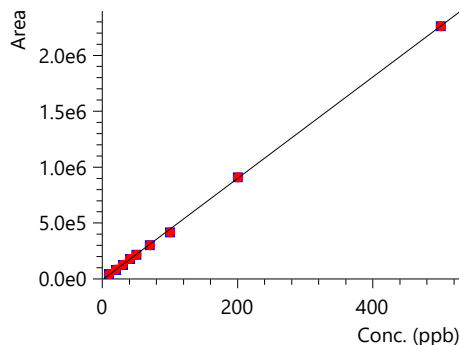

**ID3: Nicotinic Acid\_B3**

Curve Fit: Linear | Weighting: None | Zero: Not Forced

Quantitative Method: External Standard

Q 124.15>53.10

$R^2 = 0.9887199$   $R = 0.9943440$

$y = 204.9180x + 4232.636$

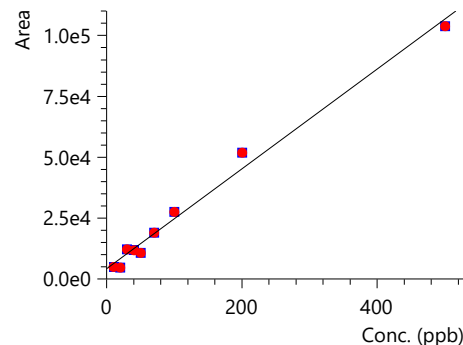

**ID4: Nicotinamide\_B3**

Curve Fit: Linear | Weighting: None | Zero: Not Forced

Quantitative Method: External Standard

Q 123.15>80.15

$R^2 = 0.9949936$   $R = 0.9974937$

$y = 15779.75x + 276709.8$

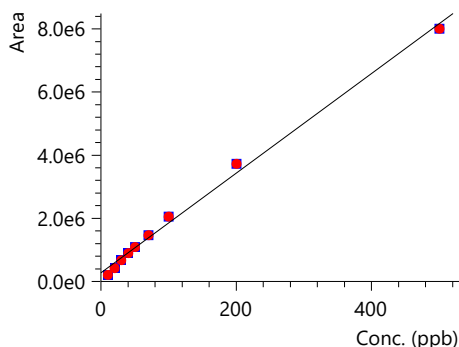

**ID5: Pantothenic Acid\_B5**

Curve Fit: Linear | Weighting: None | Zero: Not Forced

Quantitative Method: External Standard

Q 220.20>90.10

$R^2 = 0.9998427$   $R = 0.9999214$

$y = 3415.938x + 6151.823$

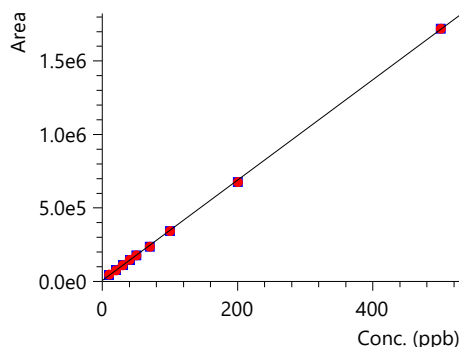

**ID6: Pyradoxin\_B6**

Curve Fit: Linear | Weighting: None | Zero: Not Forced

Quantitative Method: External Standard

Q 170.25>152.20

$R^2 = 0.9987724$   $R = 0.9993860$

$y = 72273.05x + 372775.6$

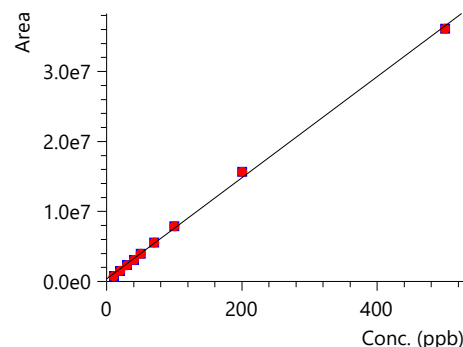

**ID7: Biotin\_B7**

Curve Fit: Linear | Weighting: None | Zero: Not Forced

Quantitative Method: External Standard

Q 245.25>227.10

$R^2 = 0.9999128$   $R = 0.9999564$

$y = 14675.23x + 2561.498$

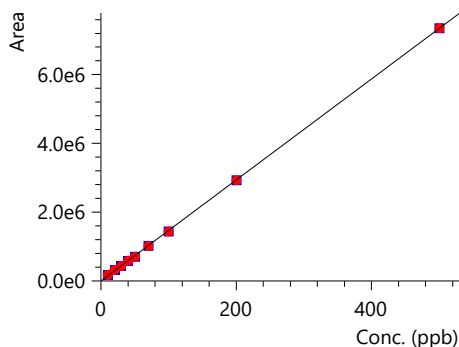

**ID8: Folic Acid\_B9**

Curve Fit: Linear | Weighting: None | Zero: Not Forced

Quantitative Method: External Standard

Q 442.30>295.20

$R^2 = 0.9997650$   $R = 0.9998825$

$y = 1731.556x + 3045.280$

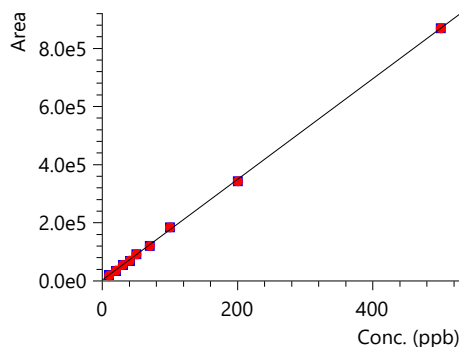

**ID9: Cynocobalmine\_B12**

Curve Fit: Linear | Weighting: None | Zero: Not Forced

Quantitative Method: External Standard

Q 678.50>147.00

$R^2 = 0.9982507$   $R = 0.9991250$

$y = 666.7228x - 1948.475$

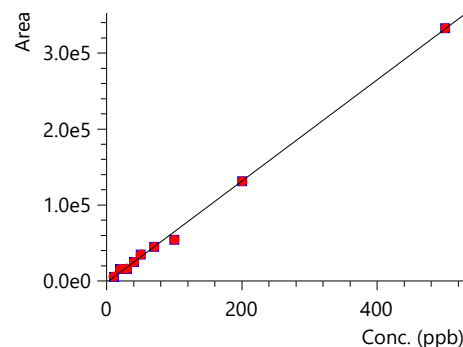

## WSV\_SampleWSVCheck\_01\_30

Sample ID: SampleWSVCheck\_01  
Date Acquired: 10/21/2023 1:14:05 AM  
Acquired by: System Administrator  
Method File: D:\Water Soluble Vitamins\_LCMSMS\LCMSMS\Aq Method\05102023\_WSV.lcm  
Data File: WSV\_SampleWSVCheck\_01\_30  
Vial: 22 | Inj. Volume: 5.0000uL | Tray: 1

| Name                | Found RT | Area    | Ref 1  | Actual Ratio | Conc.    | Dil. Factor |
|---------------------|----------|---------|--------|--------------|----------|-------------|
| Thiamine_B1         | 1.458    | 200983  | 14.83  | 395.8505     | 30.00000 |             |
| Riboflavin_B2       | 9.233    | 640285  | 42.92  | 4288.0430    | 30.00000 |             |
| Nicotinic Acid_B3   | ----     | ----    | 0.00   | ----         | 30.00000 |             |
| Nicotinamide_B3     | 6.038    | 1905042 | 39.04  | 3095.7383    | 30.00000 |             |
| Pantothenic Acid_B5 | 7.512    | 1572070 | 24.17  | 13752.4626   | 30.00000 |             |
| Pyridoxin_B6        | 5.165    | 534302  | 112.73 | 67.0485      | 30.00000 |             |
| Biotin_B7           | ----     | ----    | 0.00   | ----         | 30.00000 |             |
| Folic Acid_B9       | 8.484    | 13826   | 49.76  | 186.7817     | 30.00000 |             |
| Cynocobalmine_B12   | 8.257    | 1850    | 11.15  | 170.9339     | 30.00000 |             |

### Thiamine\_B1

Conc. 395.8505

Area 200983

R#1 14.83 (0.00)

Q 265.20>122.10 (+)

5.79e3

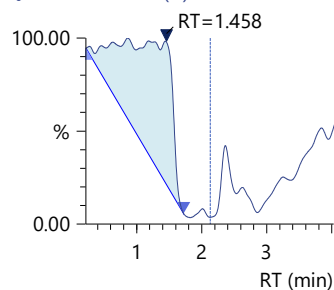

### Riboflavin\_B2

Conc. 4288.0430

Area 640285

R#1 42.92 (0.00)

Q 377.30>243.05 (+)

8.74e4

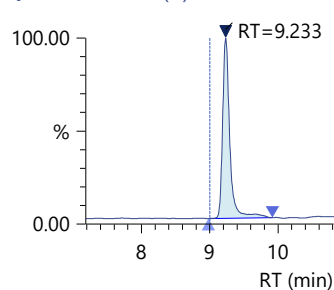

### Nicotinic Acid\_B3

Conc. ----

Area ----

R#1 0.00 (0.00)

Q 124.15>53.10 (+)

9.43e3

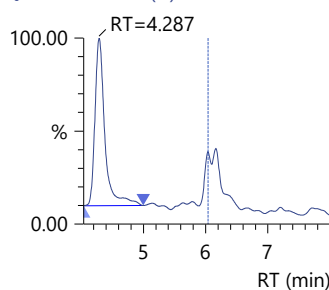

### Nicotinamide\_B3

Conc. 3095.7383

Area 1905042

R#1 39.04 (0.00)

Q 123.15>80.15 (+)

2.20e5

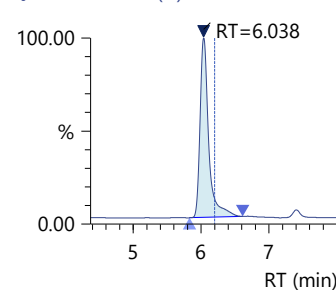

R1 265.20>144.10 (+)

1.59e3

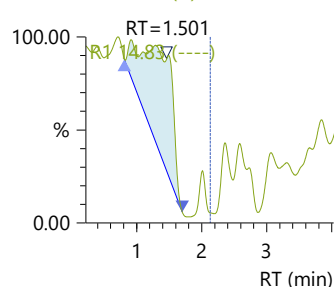

R1 377.30>172.15 (+)

4.17e4

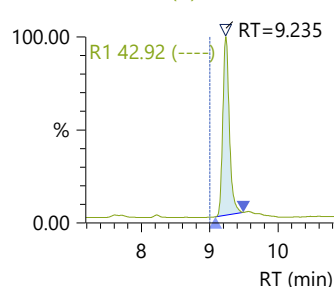

R1 124.15>78.05 (+)

1.91e4

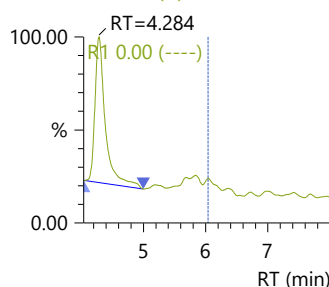

R1 123.15>53.10 (+)

8.65e4

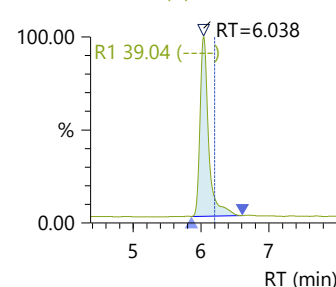

## WSV\_SampleWSVCheck\_01\_30 (continued)

### Pantothenic Acid\_B5

Conc. 13752.4626

Area 1572070

R#1 24.17 (0.00)

Q 220.20>90.10 (+)

1.48e5

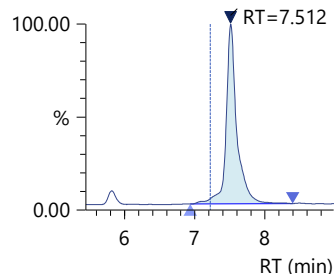

R1 220.20>72.00 (+)

3.82e4

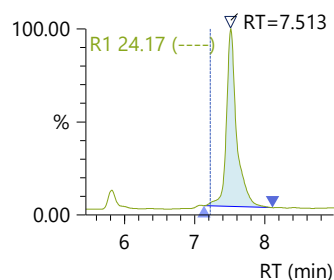

### Pyridoxin\_B6

Conc. 67.0485

Area 534302

R#1 112.73 (0.00)

Q 170.25>152.20 (+)

5.70e4

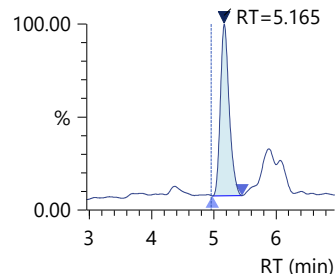

R1 170.25>134.10 (+)

6.23e4

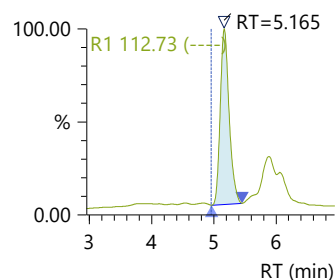

### Biotin\_B7

Conc. ---

Area ---

R#1 0.00 (0.00)

Q 245.25>227.10 (+)

3.19e4

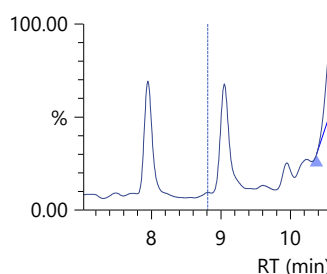

R1 245.25>97.10 (+)

3.43e3

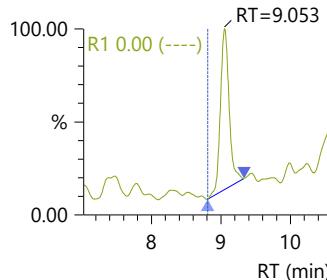

### Folic Acid\_B9

Conc. 186.7817

Area 13826

R#1 49.76 (0.00)

Q 442.30>295.20 (+)

1.67e3

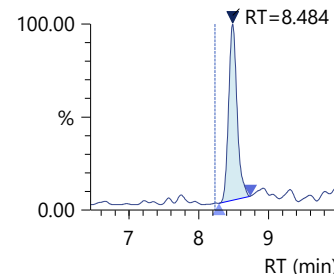

R1 442.30>176.20 (+)

6.88e2

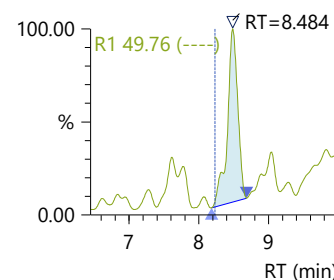

### Cynocobalmine\_B12

Conc. 170.9339

Area 1850

R#1 11.15 (0.00)

Q 678.50>147.00 (+)

2.90e2

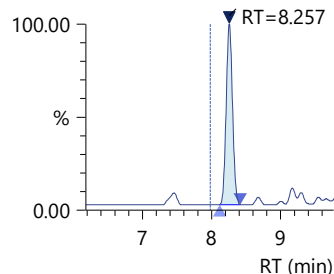

R1 678.50>359.00 (+)

3.60e1

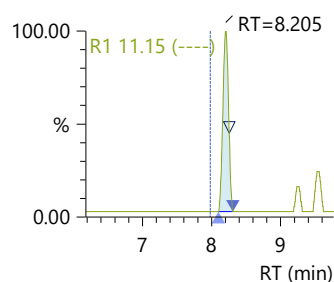

## WSV\_SampleWSVCheck\_02\_31

Sample ID: SampleWSVCheck\_02  
Date Acquired: 10/21/2023 1:29:38 AM  
Acquired by: System Administrator  
Method File: D:\Water Soluble Vitamins\_LCMSMS\LCMSMS\Aq Method\05102023\_WSV.lcm  
Data File: WSV\_SampleWSVCheck\_02\_31  
Vial: 22 | Inj. Volume: 5.0000uL | Tray: 1

| Name                | Found RT | Area    | Ref 1 | Actual Ratio | Conc.      | Dil. Factor |
|---------------------|----------|---------|-------|--------------|------------|-------------|
| Thiamine_B1         | 1.472    | 187457  |       | 26.96        | 393.5874   | 30.00000    |
| Riboflavin_B2       | 9.244    | 659460  |       | 41.62        | 4414.8318  | 30.00000    |
| Nicotinic Acid_B3   | ----     | ----    |       | 0.00         | ----       | 30.00000    |
| Nicotinamide_B3     | 6.046    | 1907537 |       | 39.71        | 3100.4809  | 30.00000    |
| Pantothenic Acid_B5 | 7.523    | 1526127 |       | 26.33        | 13348.9678 | 30.00000    |
| Pyridoxin_B6        | 5.158    | 538262  |       | 111.07       | 68.6924    | 30.00000    |
| Biotin_B7           | ----     | ----    |       | 0.00         | ----       | 30.00000    |
| Folic Acid_B9       | 8.497    | 16185   |       | 47.94        | 227.6551   | 30.00000    |
| Cynocobalmine_B12   | 8.267    | 1895    |       | 26.71        | 172.9337   | 30.00000    |

### Thiamine\_B1

Conc. 393.5874

Area 187457

R#1 26.96 (0.00)

Q 265.20>122.10 (+)

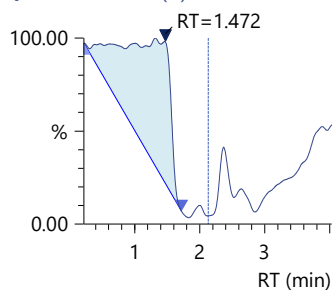

R1 265.20>144.10 (+)

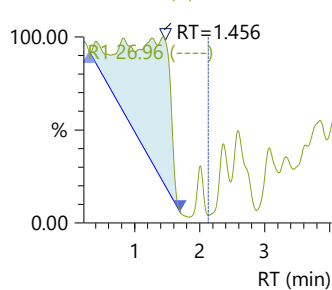

### Riboflavin\_B2

Conc. 4414.8318

Area 659460

R#1 41.62 (0.00)

Q 377.30>243.05 (+)

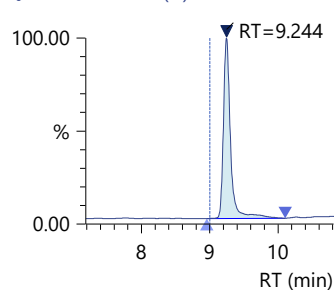

R1 377.30>172.15 (+)

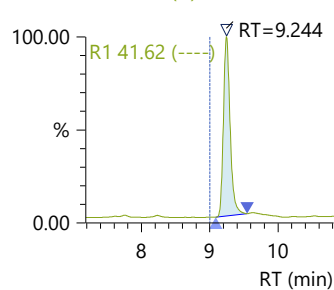

### Nicotinic Acid\_B3

Conc. ----

Area ----

R#1 0.00 (0.00)

Q 124.15>53.10 (+)

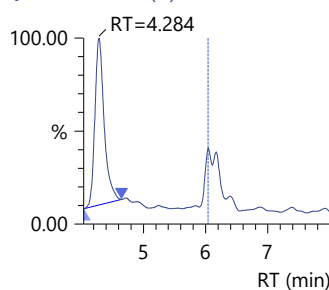

R1 124.15>78.05 (+)

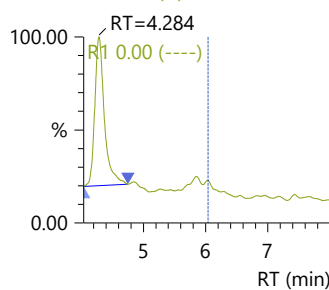

### Nicotinamide\_B3

Conc. 3100.4809

Area 1907537

R#1 39.71 (0.00)

Q 123.15>80.15 (+)

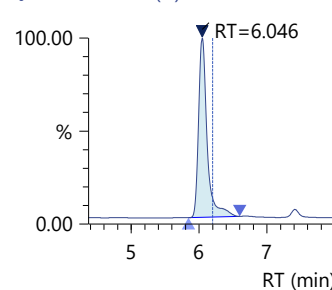

R1 123.15>53.10 (+)

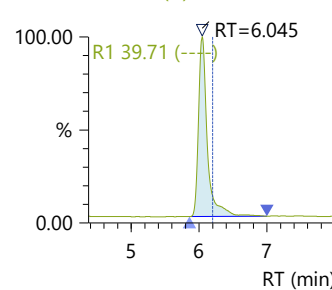

**WSV\_SampleWSVCheck\_02\_31 (continued)**

**Pantothenic Acid\_B5**

Conc. 13348.9678

Area 1526127

R#1 26.33 (0.00)

Q 220.20>90.10 (+)

1.45e5

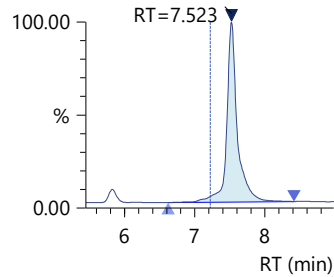

R1 220.20>72.00 (+)

3.76e4

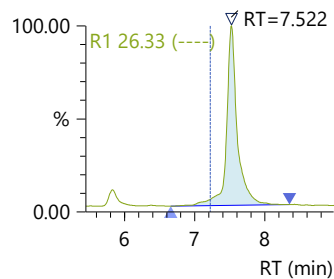

**Pyridoxin\_B6**

Conc. 68.6924

Area 538262

R#1 111.07 (0.00)

Q 170.25>152.20 (+)

5.66e4

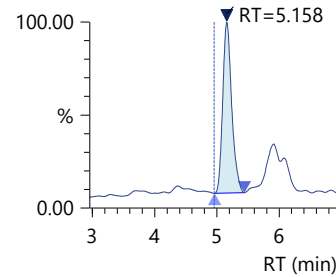

R1 170.25>134.10 (+)

6.13e4

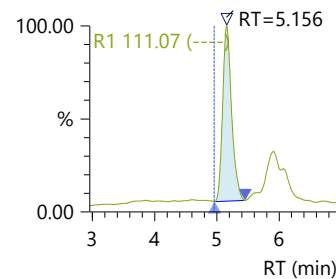

**Biotin\_B7**

Conc. ---

Area ---

R#1 0.00 (0.00)

Q 245.25>227.10 (+)

3.14e4

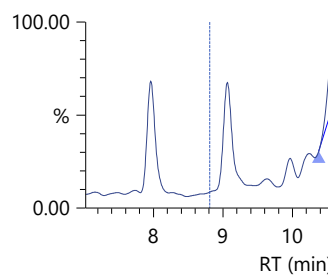

R1 245.25>97.10 (+)

3.35e3

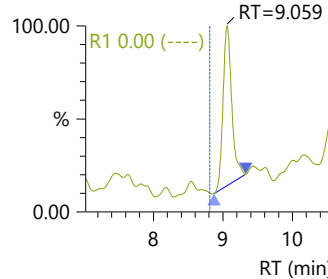

**Folic Acid\_B9**

Conc. 227.6551

Area 16185

R#1 47.94 (0.00)

Q 442.30>295.20 (+)

1.73e3

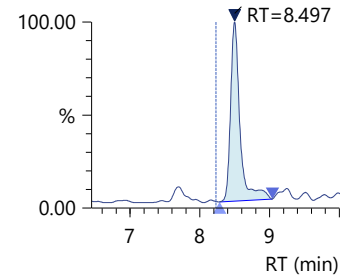

R1 442.30>176.20 (+)

8.60e2

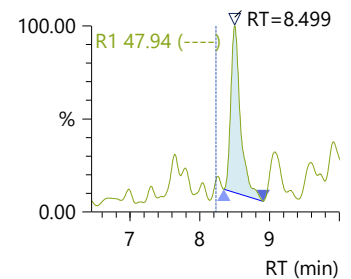

**Cynocobalmine\_B12**

Conc. 172.9337

Area 1895

R#1 26.71 (0.00)

Q 678.50>147.00 (+)

2.36e2

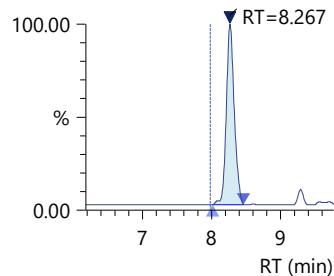

R1 678.50>359.00 (+)

8.20e1

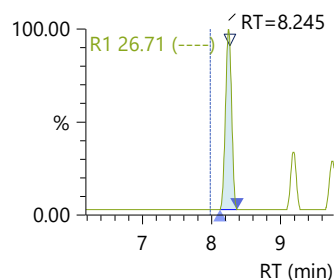

## WSV\_SampleWSVCheck\_03\_32

Sample ID: SampleWSVCheck\_03  
Date Acquired: 10/21/2023 1:45:11 AM  
Acquired by: System Administrator  
Method File: D:\Water Soluble Vitamins\_LCMSMS\LCMSMS\Aq Method\05102023\_WSV.lcm  
Data File: WSV\_SampleWSVCheck\_03\_32  
Vial: 22 | Inj. Volume: 5.0000uL | Tray: 1

| Name                | Found RT | Area    | Ref 1 | Actual Ratio | Conc.      | Dil. Factor |
|---------------------|----------|---------|-------|--------------|------------|-------------|
| Thiamine_B1         | 1.466    | 199124  |       | 26.02        | 395.5395   | 30.00000    |
| Riboflavin_B2       | 9.242    | 591352  |       | 49.91        | 3964.4935  | 30.00000    |
| Nicotinic Acid_B3   | ----     | ----    |       | 0.00         | ----       | 30.00000    |
| Nicotinamide_B3     | 6.041    | 1913965 |       | 40.74        | 3112.7025  | 30.00000    |
| Pantothenic Acid_B5 | 7.521    | 1508284 |       | 26.29        | 13192.2694 | 30.00000    |
| Pyridoxin_B6        | 5.152    | 543743  |       | 110.73       | 70.9671    | 30.00000    |
| Biotin_B7           | 7.959    | 180954  |       | 0.00         | 364.6807   | 30.00000    |
| Folic Acid_B9       | 8.493    | 16691   |       | 53.92        | 236.4103   | 30.00000    |
| Cynocobalmine_B12   | 8.274    | 1494    |       | 0.00         | 154.8980   | 30.00000    |

### Thiamine\_B1

Conc. 395.5395

Area 199124

R#1 26.02 (0.00)

Q 265.20>122.10 (+)

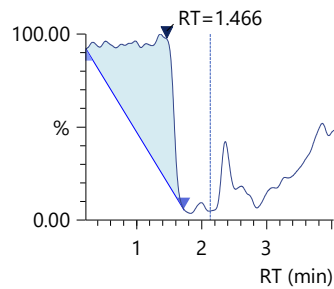

### Riboflavin\_B2

Conc. 3964.4935

Area 591352

R#1 49.91 (0.00)

Q 377.30>243.05 (+)

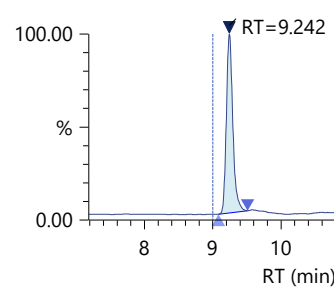

### Nicotinic Acid\_B3

Conc. ----

Area ----

R#1 0.00 (0.00)

Q 124.15>53.10 (+)

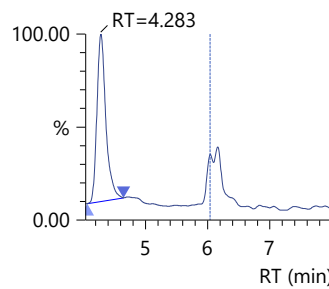

### Nicotinamide\_B3

Conc. 3112.7025

Area 1913965

R#1 40.74 (0.00)

Q 123.15>80.15 (+)

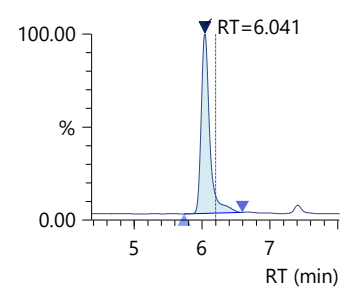

R1 265.20>144.10 (+)

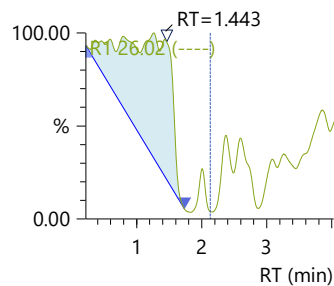

R1 377.30>172.15 (+)

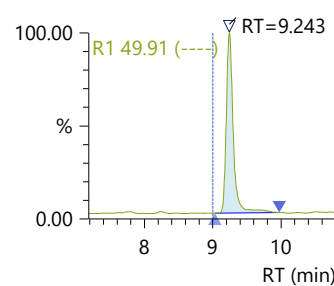

R1 124.15>78.05 (+)

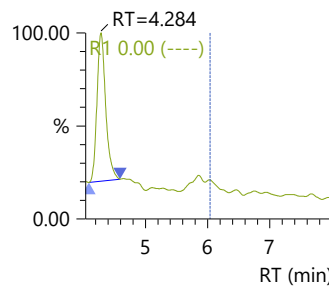

R1 123.15>53.10 (+)

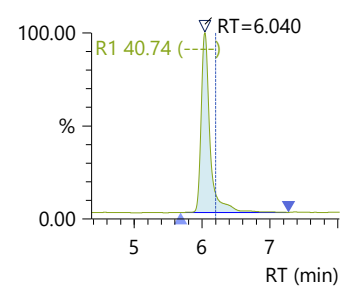

## WSV\_SampleWSVCheck\_03\_32 (continued)

### Pantothenic Acid\_B5

Conc. 13192.2694

Area 1508284

R#1 26.29 (0.00)

Q 220.20>90.10 (+)

1.45e5

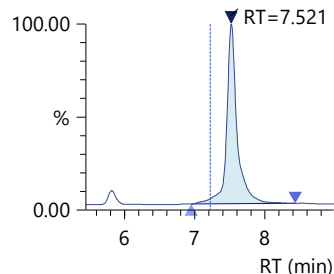

R1 220.20>72.00 (+)

3.77e4

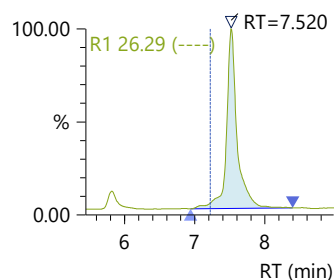

### Pyridoxin\_B6

Conc. 70.9671

Area 543743

R#1 110.73 (0.00)

Q 170.25>152.20 (+)

5.60e4

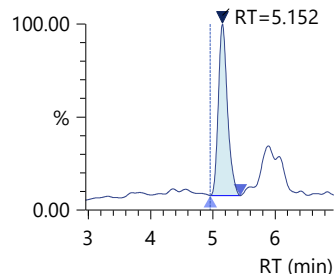

R1 170.25>134.10 (+)

6.09e4

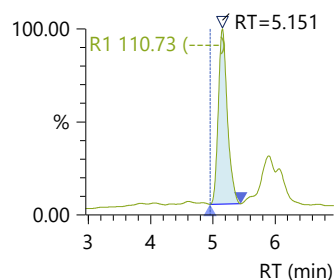

### Biotin\_B7

Conc. 364.6807

Area 180954

R#1 0.00 (0.00)

Q 245.25>227.10 (+)

3.15e4

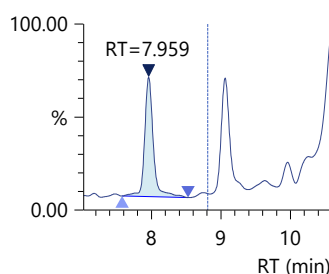

R1 245.25>97.10 (+)

3.35e3

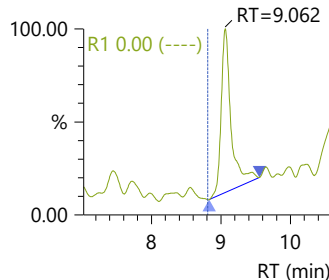

### Folic Acid\_B9

Conc. 236.4103

Area 16691

R#1 53.92 (0.00)

Q 442.30>295.20 (+)

2.06e3

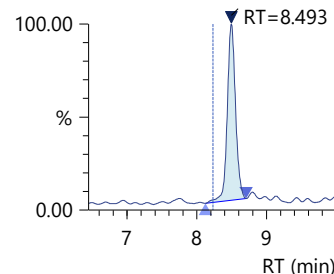

R1 442.30>176.20 (+)

8.68e2

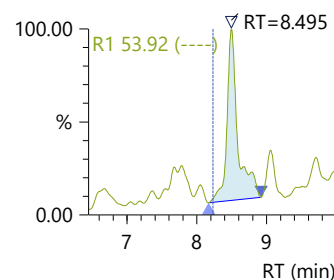

### Cynocobalmine\_B12

Conc. 154.8980

Area 1494

R#1 0.00 (0.00)

Q 678.50>147.00 (+)

1.59e2

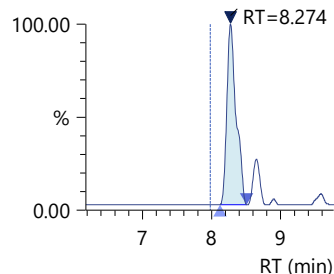

R1 678.50>359.00 (+)

3.80e1

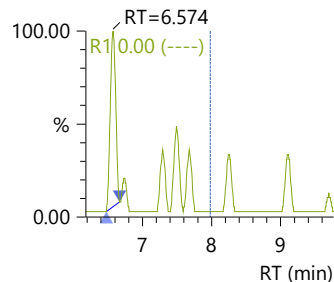

## WSV\_SampleWSVCheck\_04\_33

Sample ID: SampleWSVCheck\_04  
Date Acquired: 10/21/2023 2:00:45 AM  
Acquired by: System Administrator  
Method File: D:\Water Soluble Vitamins\_LCMSMS\LCMSMS\Aq Method\05102023\_WSV.lcm  
Data File: WSV\_SampleWSVCheck\_04\_33  
Vial: 22 | Inj. Volume: 5.0000uL | Tray: 1

| Name                | Found RT | Area    | Ref 1 Actual Ratio | Conc.      | Dil. Factor |
|---------------------|----------|---------|--------------------|------------|-------------|
| Thiamine_B1         | 1.485    | 186608  | 30.01              | 393.4454   | 30.00000    |
| Riboflavin_B2       | 9.235    | 654354  | 45.79              | 4381.0714  | 30.00000    |
| Nicotinic Acid_B3   | ----     | ----    | 0.00               | ----       | 30.00000    |
| Nicotinamide_B3     | 6.040    | 1920347 | 39.94              | 3124.8353  | 30.00000    |
| Pantothenic Acid_B5 | 7.514    | 1505927 | 24.59              | 13171.5677 | 30.00000    |
| Pyridoxin_B6        | 5.156    | 562388  | 111.52             | 78.7067    | 30.00000    |
| Biotin_B7           | ----     | ----    | 0.00               | ----       | 30.00000    |
| Folic Acid_B9       | 8.482    | 15042   | 34.93              | 207.8502   | 30.00000    |
| Cynocobalmine_B12   | 8.250    | 1939    | 8.53               | 174.9429   | 30.00000    |

### Thiamine\_B1

Conc. 393.4454

Area 186608

R#1 30.01 (0.00)

Q 265.20>122.10 (+)

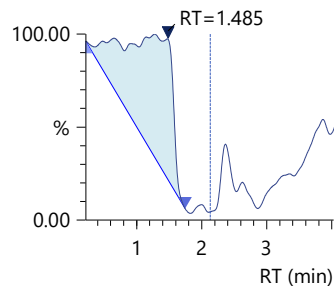

R1 265.20>144.10 (+)

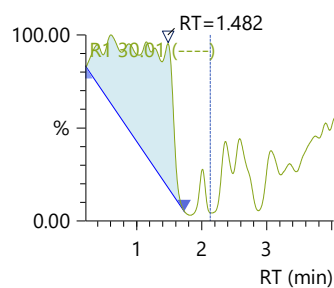

### Riboflavin\_B2

Conc. 4381.0714

Area 654354

R#1 45.79 (0.00)

Q 377.30>243.05 (+)

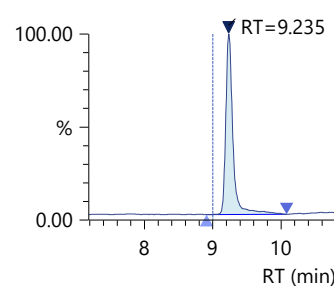

R1 377.30>172.15 (+)

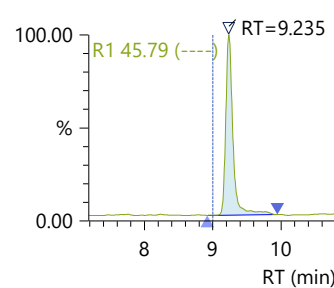

### Nicotinic Acid\_B3

Conc. ----

Area ----

R#1 0.00 (0.00)

Q 124.15>53.10 (+)

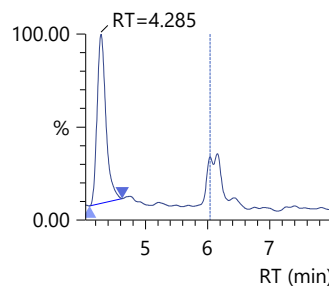

R1 124.15>78.05 (+)

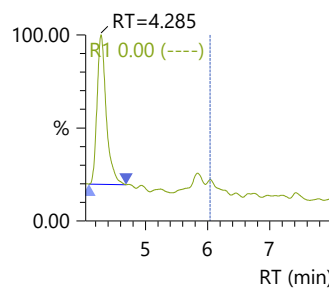

### Nicotinamide\_B3

Conc. 3124.8353

Area 1920347

R#1 39.94 (0.00)

Q 123.15>80.15 (+)

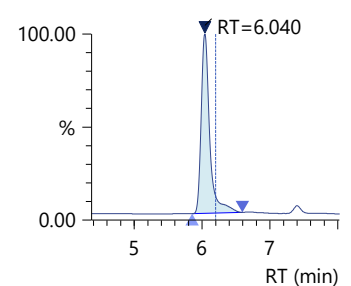

R1 123.15>53.10 (+)

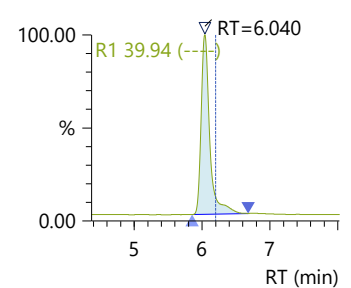



## WSV\_SampleWSVCheck\_04\_33 (continued)

### Pantothenic Acid\_B5

Conc. 13171.5677

Area 1505927

R#1 24.59 (0.00)

Q 220.20>90.10 (+)

1.46e5

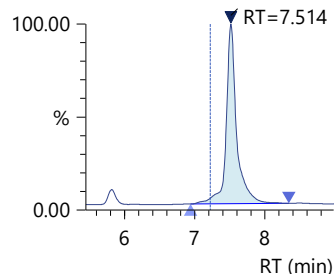

R1 220.20>72.00 (+)

3.78e4

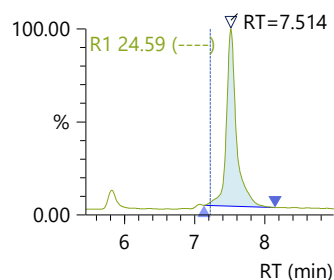

### Pyridoxin\_B6

Conc. 78.7067

Area 562388

R#1 111.52 (0.00)

Q 170.25>152.20 (+)

5.83e4

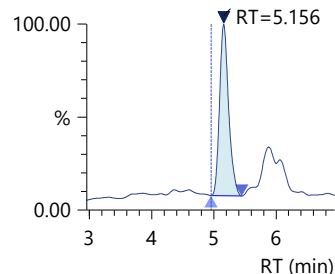

R1 170.25>134.10 (+)

6.38e4

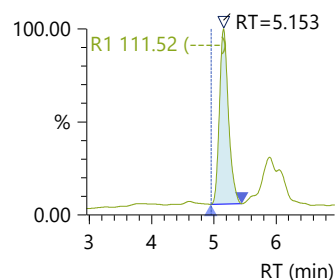

### Biotin\_B7

Conc. ---

Area ---

R#1 0.00 (0.00)

Q 245.25>227.10 (+)

3.28e4

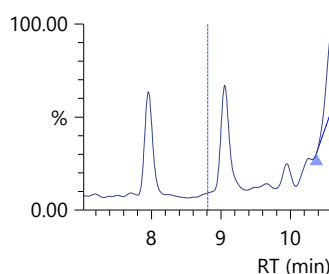

R1 245.25>97.10 (+)

3.44e3

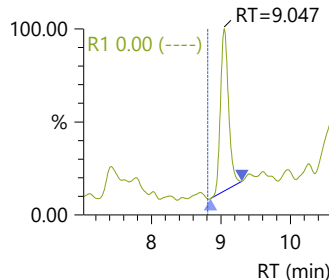

### Folic Acid\_B9

Conc. 207.8502

Area 15042

R#1 34.93 (0.00)

Q 442.30>295.20 (+)

2.11e3

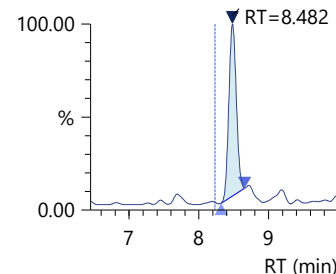

R1 442.30>176.20 (+)

7.92e2

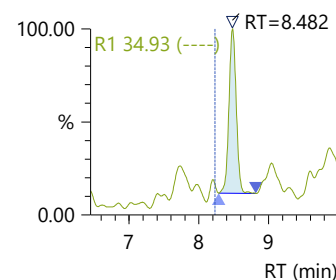

### Cynocobalmine\_B12

Conc. 174.9429

Area 1939

R#1 8.53 (0.00)

Q 678.50>147.00 (+)

2.52e2

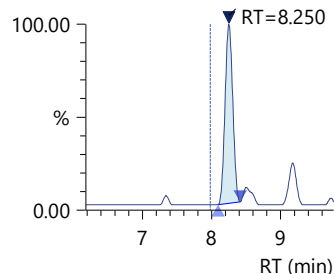

R1 678.50>359.00 (+)

2.50e1

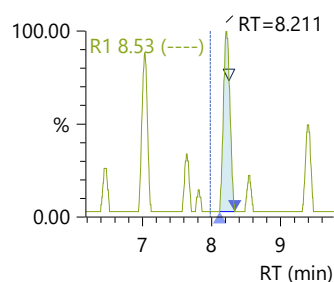

## WSV\_SampleWSVCheck\_05\_34

Sample ID: SampleWSVCheck\_05  
Date Acquired: 10/21/2023 2:16:18 AM  
Acquired by: System Administrator  
Method File: D:\Water Soluble Vitamins\_LCMSMS\LCMSMS\Aq Method\05102023\_WSV.lcm  
Data File: WSV\_SampleWSVCheck\_05\_34  
Vial: 22 | Inj. Volume: 5.0000uL | Tray: 1

| Name                | Found RT | Area    | Ref 1 | Actual Ratio | Conc.      | Dil. Factor |
|---------------------|----------|---------|-------|--------------|------------|-------------|
| Thiamine_B1         | 1.472    | 193909  |       | 20.98        | 394.6668   | 30.00000    |
| Riboflavin_B2       | 9.239    | 650902  |       | 41.99        | 4358.2451  | 30.00000    |
| Nicotinic Acid_B3   | ----     | ----    |       | 0.00         | ----       | 30.00000    |
| Nicotinamide_B3     | 6.036    | 2020725 |       | 37.80        | 3315.6706  | 30.00000    |
| Pantothenic Acid_B5 | 7.515    | 1512007 |       | 26.21        | 13224.9671 | 30.00000    |
| Pyridoxin_B6        | 5.141    | 556285  |       | 111.28       | 76.1733    | 30.00000    |
| Biotin_B7           | ----     | ----    |       | 0.00         | ----       | 30.00000    |
| Folic Acid_B9       | 8.492    | 16985   |       | 47.97        | 241.5179   | 30.00000    |
| Cynocobalmine_B12   | 8.262    | 1075    |       | 0.00         | 136.0449   | 30.00000    |

### Thiamine\_B1

Conc. 394.6668

Area 193909

R#1 20.98 (0.00)

Q 265.20>122.10 (+)

5.68e3

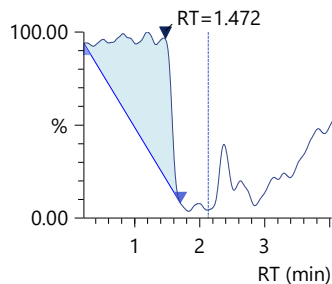

### Riboflavin\_B2

Conc. 4358.2451

Area 650902

R#1 41.99 (0.00)

Q 377.30>243.05 (+)

9.05e4

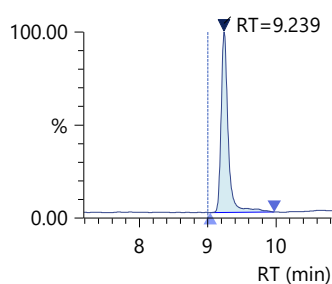

### Nicotinic Acid\_B3

Conc. ----

Area ----

R#1 0.00 (0.00)

Q 124.15>53.10 (+)

1.07e4

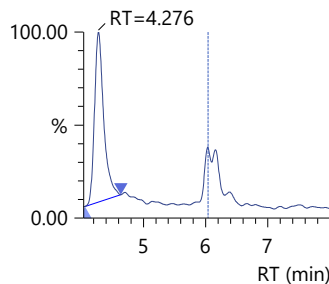

### Nicotinamide\_B3

Conc. 3315.6706

Area 2020725

R#1 37.80 (0.00)

Q 123.15>80.15 (+)

2.27e5

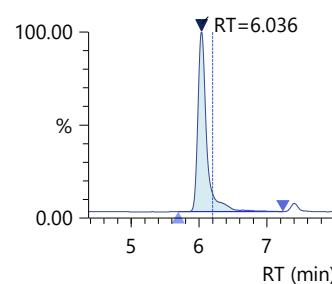

R1 265.20>144.10 (+)

1.59e3

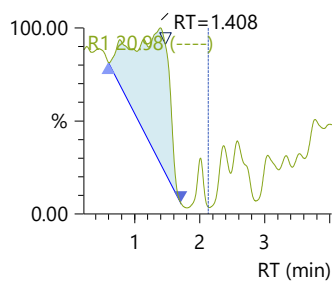

R1 377.30>172.15 (+)

4.17e4

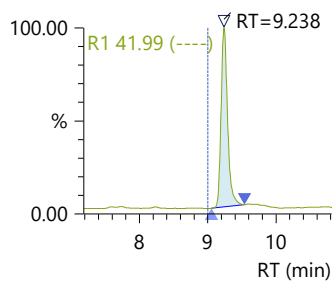

R1 124.15>78.05 (+)

2.14e4

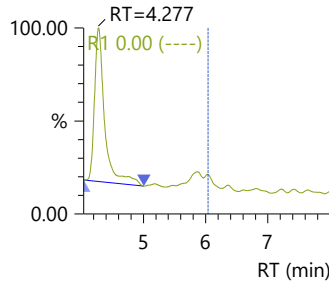

R1 123.15>53.10 (+)

8.94e4

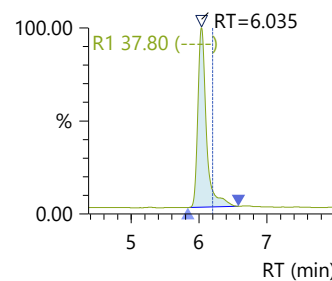

**WSV\_SampleWSVCheck\_05\_34 (continued)**

**Pantothenic Acid\_B5**

Conc. 13224.9671

Area 1512007

R#1 26.21 (0.00)

Q 220.20>90.10 (+)

1.46e5

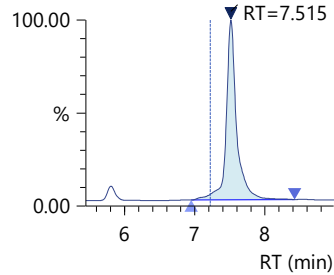

R1 220.20>72.00 (+)

3.76e4

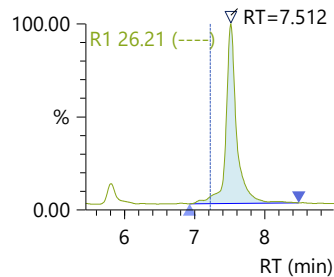

**Pyridoxin\_B6**

Conc. 76.1733

Area 556285

R#1 111.28 (0.00)

Q 170.25>152.20 (+)

5.71e4

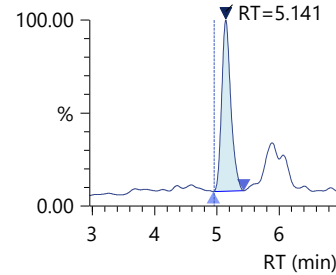

R1 170.25>134.10 (+)

6.21e4

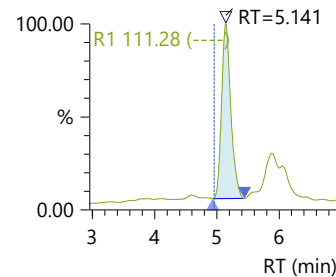

**Biotin\_B7**

Conc. ----

Area ----

R#1 0.00 (0.00)

Q 245.25>227.10 (+)

3.33e4

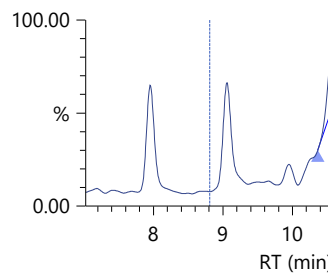

R1 245.25>97.10 (+)

3.52e3

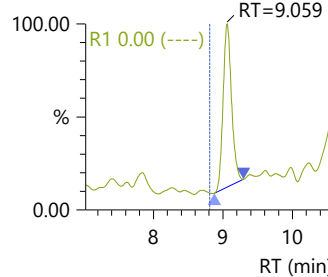

**Folic Acid\_B9**

Conc. 241.5179

Area 16985

R#1 47.97 (0.00)

Q 442.30>295.20 (+)

2.13e3

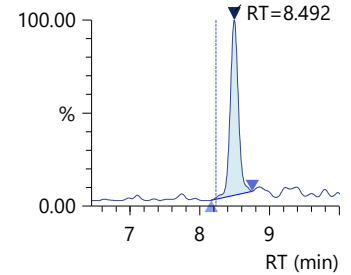

R1 442.30>176.20 (+)

9.62e2

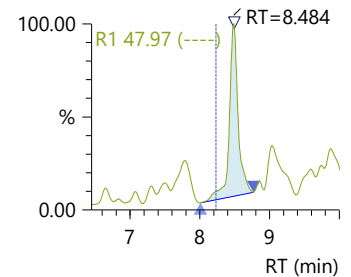

**Cynocobalmine\_B12**

Conc. 136.0449

Area 1075

R#1 0.00 (0.00)

Q 678.50>147.00 (+)

1.47e2

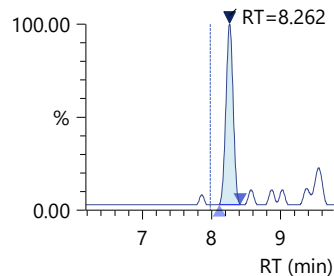

R1 678.50>359.00 (+)

4.60e1

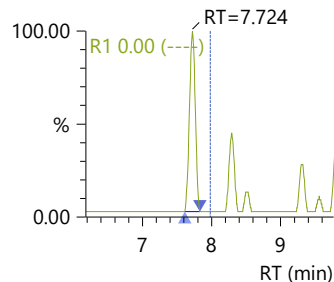

## WSV\_Blank\_04\_20

Sample ID: Blank\_04  
Date Acquired: 10/20/2023 10:39:00 PM  
Acquired by: System Administrator  
Method File: D:\Water Soluble Vitamins\_LCMSMS\LCMSMS\Aq Method\05102023\_WSV.lcm  
Data File: WSV\_Blank\_04\_20  
Vial: 1 | Inj. Volume: 5.0000uL | Tray: 1

| Name                | Found RT | Area   | Ref 1 Actual Ratio | Conc.    | Dil. Factor |
|---------------------|----------|--------|--------------------|----------|-------------|
| Thiamine_B1         | 2.648    | 33846  | 20.82              | 12.2629  | 1.00000     |
| Riboflavin_B2       | 9.264    | 18431  | 38.34              | 5.8754   | 1.00000     |
| Nicotinic Acid_B3   | ----     | ----   | 0.00               | ----     | 1.00000     |
| Nicotinamide_B3     | 6.675    | 75123  | 9.12               | -12.7750 | 1.00000     |
| Pantothenic Acid_B5 | 7.564    | 216089 | 29.57              | 61.4582  | 1.00000     |
| Pyridoxin_B6        | ----     | ----   | 0.00               | ----     | 1.00000     |
| Biotin_B7           | 9.072    | 104223 | 15.45              | 6.9275   | 1.00000     |
| Folic Acid_B9       | 8.496    | 11482  | 43.85              | 4.8726   | 1.00000     |
| Cynocobalmine_B12   | 8.297    | 757    | 0.00               | 4.0576   | 1.00000     |

### Thiamine\_B1

Conc. 12.2629

Area 33846

R#1 20.82 (0.00)

Q 265.20>122.10 (+)

7.28e3

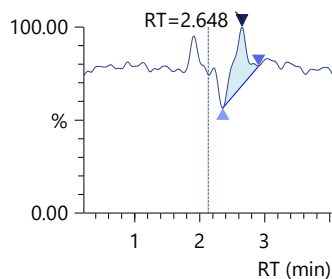

R1 265.20>144.10 (+)

1.93e3

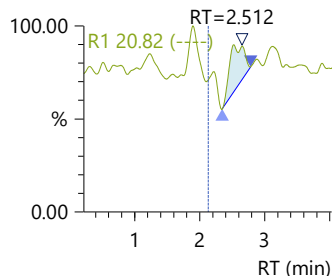

### Riboflavin\_B2

Conc. 5.8754

Area 18431

R#1 38.34 (0.00)

Q 377.30>243.05 (+)

2.59e3

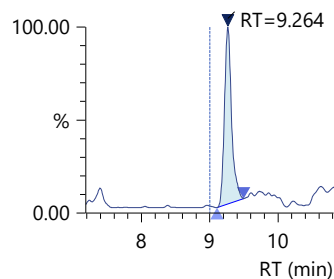

R1 377.30>172.15 (+)

1.29e3

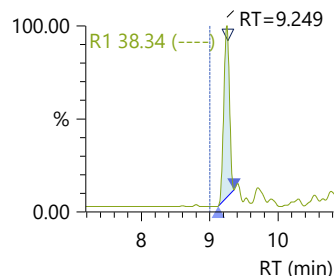

### Nicotinic Acid\_B3

Conc. ----

Area ----

R#1 0.00 (0.00)

Q 124.15>53.10 (+)

2.77e2

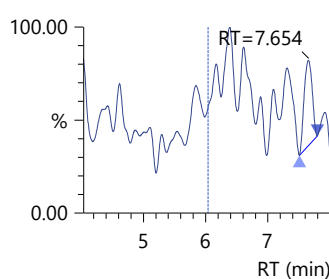

R1 124.15>78.05 (+)

9.73e2

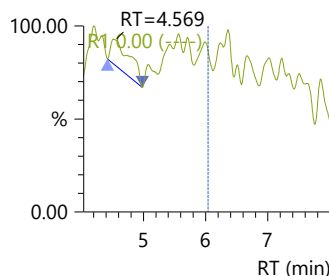

### Nicotinamide\_B3

Conc. -12.7750

Area 75123

R#1 9.12 (0.00)

Q 123.15>80.15 (+)

2.78e3

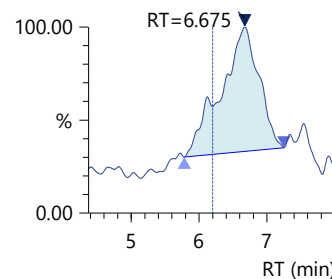

R1 123.15>53.10 (+)

1.12e3

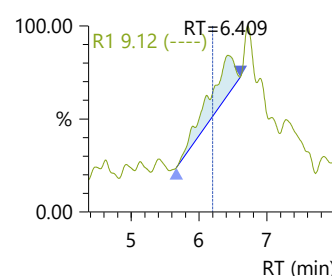

## WSV\_Blank\_04\_20 (continued)

### Pantothenic Acid\_B5

Conc. 61.4582  
Area 216089  
R#1 29.57 (0.00)  
Q 220.20>90.10 (+)

8.41e3

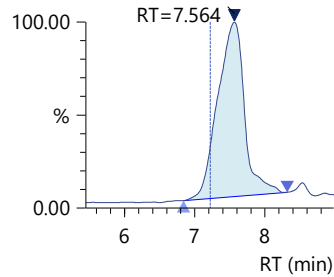

R1 220.20>72.00 (+) 2.43e3

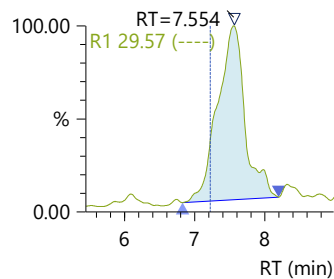

### Pyridoxin\_B6

Conc. ---  
Area ---  
R#1 0.00 (0.00)  
Q 170.25>152.20 (+)

2.15e4

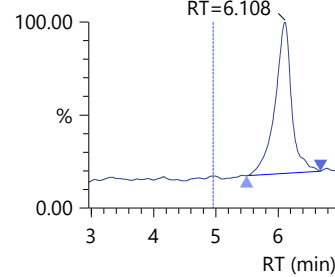

R1 170.25>134.10 (+) 2.16e4

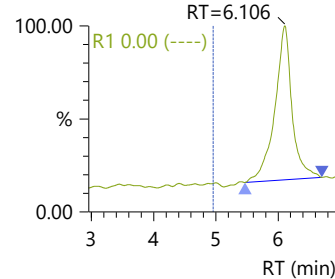

### Biotin\_B7

Conc. 6.9275  
Area 104223  
R#1 15.45 (0.00)  
Q 245.25>227.10 (+)

1.28e4

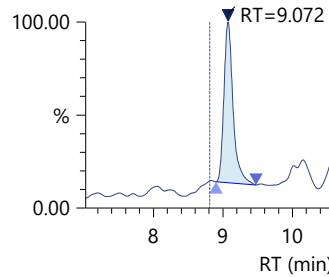

R1 245.25>97.10 (+) 1.99e3

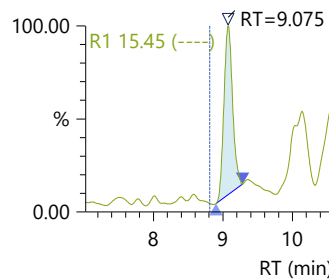

### Folic Acid\_B9

Conc. 4.8726  
Area 11482  
R#1 43.85 (0.00)  
Q 442.30>295.20 (+)

1.42e3

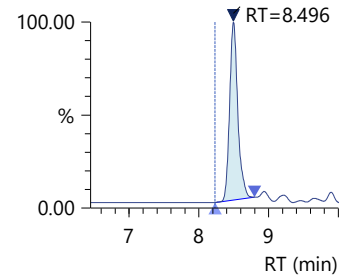

R1 442.30>176.20 (+) 5.85e2

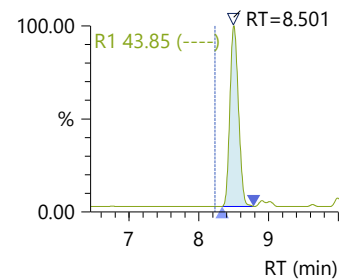

### Cynocobalmine\_B12

Conc. 4.0576  
Area 757  
R#1 0.00 (0.00)  
Q 678.50>147.00 (+)

1.00e2

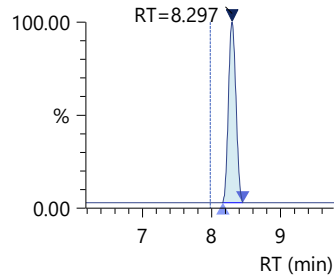

R1 678.50>359.00 (+) 0.00e0

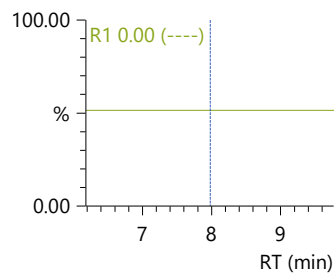

## WSV\_Blank\_05\_29

Sample ID: Blank\_05  
Date Acquired: 10/21/2023 12:58:35 AM  
Acquired by: System Administrator  
Method File: D:\Water Soluble Vitamins\_LCMSMS\LCMSMS\Aq Method\05102023\_WSV.lcm  
Data File: WSV\_Blank\_05\_29  
Vial: 1 | Inj. Volume: 5.0000uL | Tray: 1

| Name                | Found RT | Area   | Ref 1 Actual Ratio | Conc.    | Dil. Factor |
|---------------------|----------|--------|--------------------|----------|-------------|
| Thiamine_B1         | 2.642    | 37345  | 18.99              | 12.2824  | 1.00000     |
| Riboflavin_B2       | 9.235    | 18539  | 48.15              | 5.8993   | 1.00000     |
| Nicotinic Acid_B3   | 6.038    | 1381   | 0.00               | -13.9137 | 1.00000     |
| Nicotinamide_B3     | 6.574    | 52905  | 33.89              | -14.1831 | 1.00000     |
| Pantothenic Acid_B5 | 7.546    | 241001 | 27.05              | 68.7511  | 1.00000     |
| Pyridoxin_B6        | ----     | ----   | 0.00               | ----     | 1.00000     |
| Biotin_B7           | 9.053    | 119049 | 13.72              | 7.9377   | 1.00000     |
| Folic Acid_B9       | 8.479    | 9447   | 40.93              | 3.6972   | 1.00000     |
| Cynocobalmine_B12   | 8.277    | 606    | 10.56              | 3.8311   | 1.00000     |

### Thiamine\_B1

Conc. 12.2824

Area 37345

R#1 18.99 (0.00)

Q 265.20>122.10 (+)

7.13e3

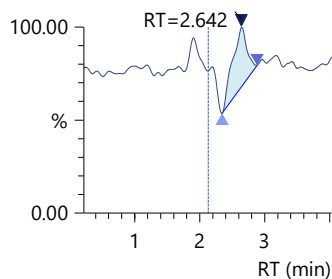

R1 265.20>144.10 (+)

1.83e3

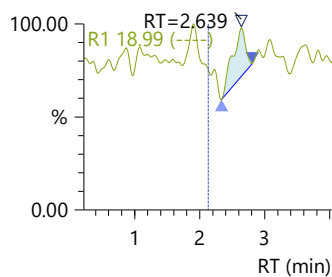

### Riboflavin\_B2

Conc. 5.8993

Area 18539

R#1 48.15 (0.00)

Q 377.30>243.05 (+)

2.65e3

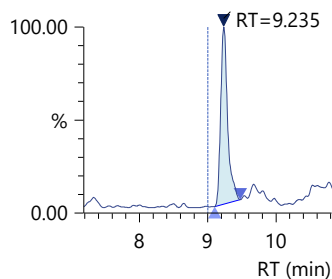

R1 377.30>172.15 (+)

1.15e3

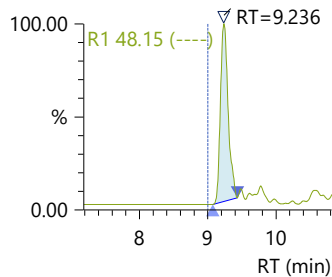

### Nicotinic Acid\_B3

Conc. -13.9137

Area 1381

R#1 0.00 (0.00)

Q 124.15>53.10 (+)

9.52e2

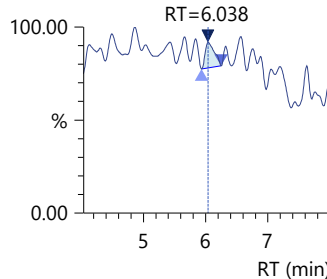

R1 124.15>78.05 (+)

5.01e3

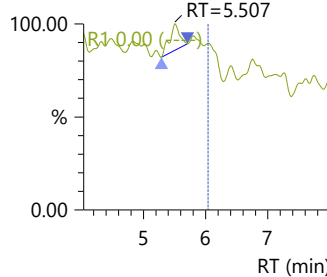

### Nicotinamide\_B3

Conc. -14.1831

Area 52905

R#1 33.89 (0.00)

Q 123.15>80.15 (+)

3.20e3

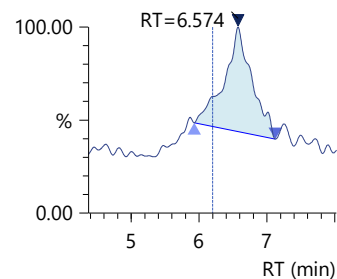

R1 123.15>53.10 (+)

1.29e3

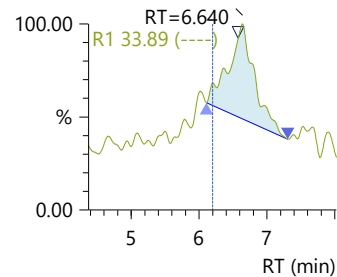

**WSV\_Blank\_05\_29 (continued)**

**Pantothenic Acid\_B5**

Conc. 68.7511

Area 241001

R#1 27.05 (0.00)

Q 220.20>90.10 (+)

9.96e3

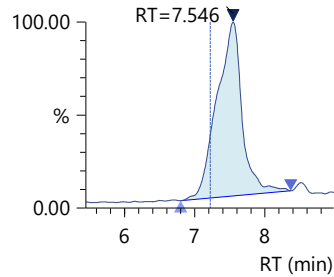

R1 220.20>72.00 (+)

2.84e3

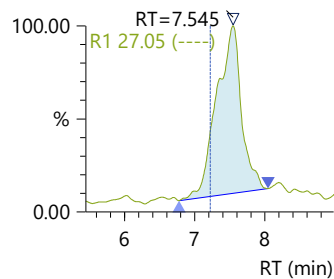

**Pyridoxin\_B6**

Conc. ----

Area ----

R#1 0.00 (0.00)

Q 170.25>152.20 (+)

1.80e4

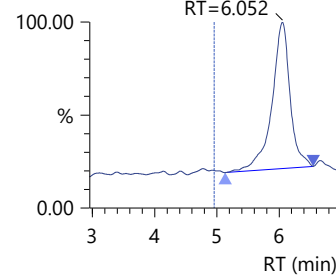

R1 170.25>134.10 (+)

1.86e4

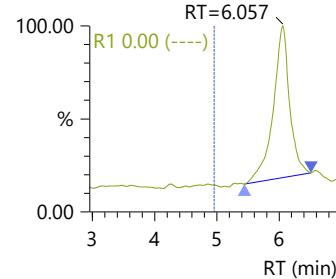

**Biotin\_B7**

Conc. 7.9377

Area 119049

R#1 13.72 (0.00)

Q 245.25>227.10 (+)

1.33e4

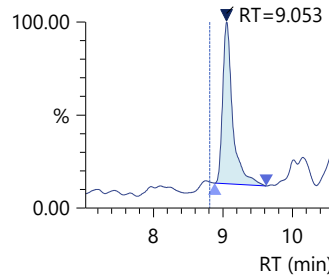

R1 245.25>97.10 (+)

2.19e3

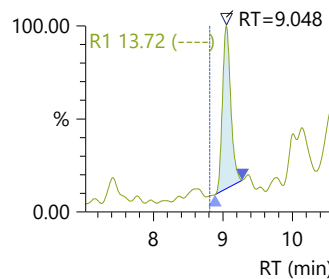

**Folic Acid\_B9**

Conc. 3.6972

Area 9447

R#1 40.93 (0.00)

Q 442.30>295.20 (+)

1.24e3

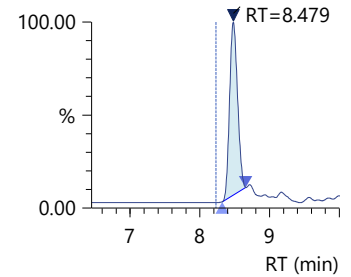

R1 442.30>176.20 (+)

4.76e2

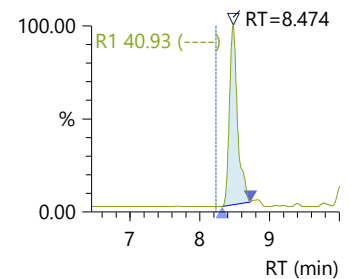

**Cynocobalmine\_B12**

Conc. 3.8311

Area 606

R#1 10.56 (0.00)

Q 678.50>147.00 (+)

7.70e1

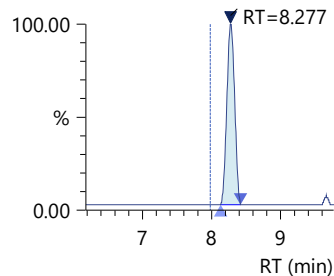

R1 678.50>359.00 (+)

1.20e1

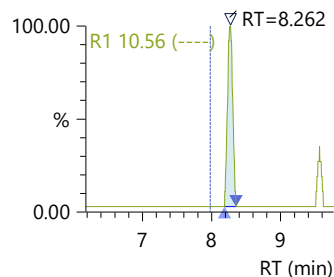

## WSV\_Blank\_18\_35

Sample ID: Blank\_18

Date Acquired: 10/21/2023 2:31:51 AM

Acquired by: System Administrator

Method File: D:\Water Soluble Vitamins\_LCMSMS\LCMSMS\Aq Method\05102023\_WSV.lcm

Data File: WSV\_Blank\_18\_35

Vial: 1 | Inj. Volume: 5.0000uL | Tray: 1

| Name                | Found RT | Area   | Ref 1 Actual Ratio | Conc.    | Dil. Factor |
|---------------------|----------|--------|--------------------|----------|-------------|
| Thiamine_B1         | 1.911    | 63164  | 0.00               | 12.4264  | 1.00000     |
| Riboflavin_B2       | 9.238    | 18713  | 48.45              | 5.9376   | 1.00000     |
| Nicotinic Acid_B3   | ----     | ----   | 0.00               | ----     | 1.00000     |
| Nicotinamide_B3     | 6.510    | 109179 | 34.44              | -10.6168 | 1.00000     |
| Pantothenic Acid_B5 | 7.535    | 218207 | 30.82              | 62.0783  | 1.00000     |
| Pyridoxin_B6        | ----     | ----   | 0.00               | ----     | 1.00000     |
| Biotin_B7           | 9.052    | 105344 | 17.86              | 7.0038   | 1.00000     |
| Folic Acid_B9       | 8.484    | 10708  | 47.73              | 4.4252   | 1.00000     |
| Cynocobalmine_B12   | 8.257    | 329    | 0.00               | 3.4162   | 1.00000     |

### Thiamine\_B1

Conc. 12.4264

Area 63164

R#1 0.00 (0.00)

Q 265.20>122.10 (+)

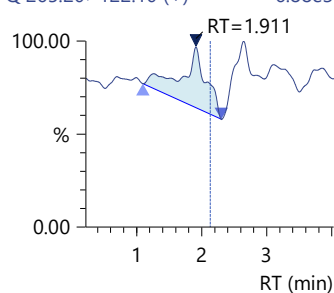

R1 265.20>144.10 (+)

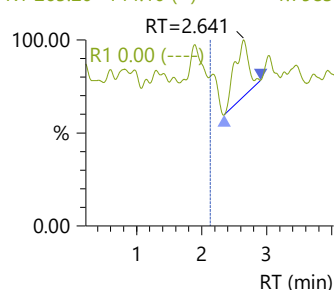

### Riboflavin\_B2

Conc. 5.9376

Area 18713

R#1 48.45 (0.00)

Q 377.30>243.05 (+)

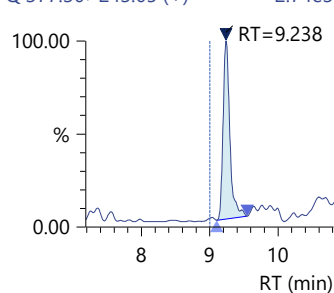

R1 377.30>172.15 (+)

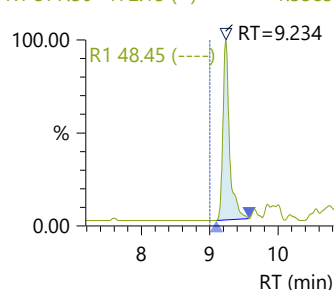

### Nicotinic Acid\_B3

Conc. ----

Area ----

R#1 0.00 (0.00)

Q 124.15>53.10 (+)

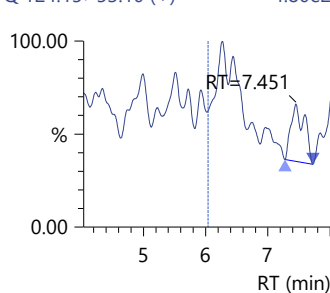

R1 124.15>78.05 (+)

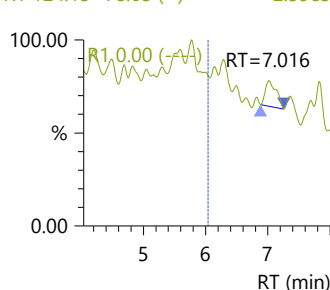

### Nicotinamide\_B3

Conc. -10.6168

Area 109179

R#1 34.44 (0.00)

Q 123.15>80.15 (+)

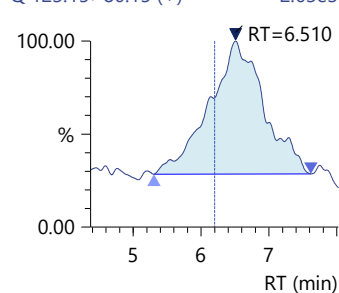

R1 123.15>53.10 (+)

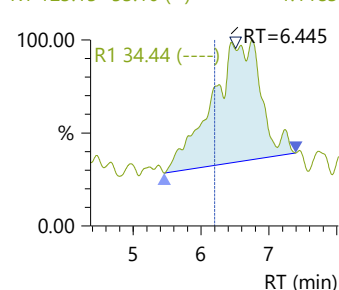



## WSV\_Blank\_18\_35 (continued)

### Pantothenic Acid\_B5

Conc. 62.0783

Area 218207

R#1 30.82 (0.00)

Q 220.20>90.10 (+)

9.34e3

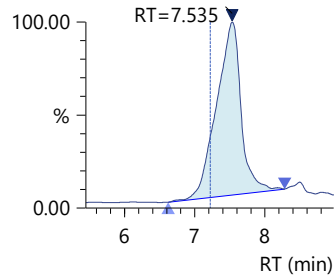

R1 220.20>72.00 (+)

2.64e3

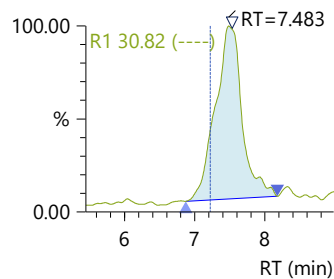

### Pyridoxin\_B6

Conc. ----

Area ----

R#1 0.00 (0.00)

Q 170.25>152.20 (+)

1.83e4

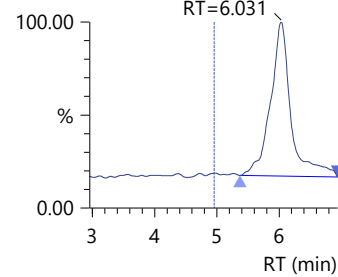

R1 170.25>134.10 (+)

1.82e4

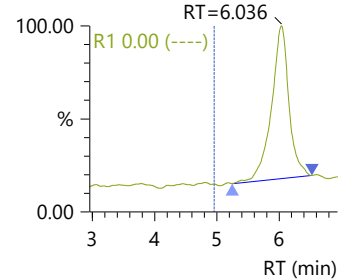

### Biotin\_B7

Conc. 7.0038

Area 105344

R#1 17.86 (0.00)

Q 245.25>227.10 (+)

1.28e4

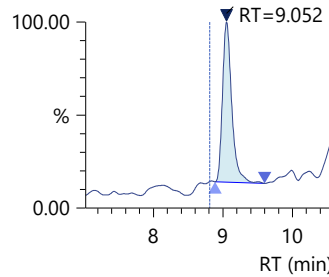

R1 245.25>97.10 (+)

1.84e3

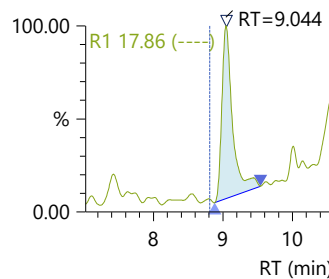

### Folic Acid\_B9

Conc. 4.4252

Area 10708

R#1 47.73 (0.00)

Q 442.30>295.20 (+)

1.38e3

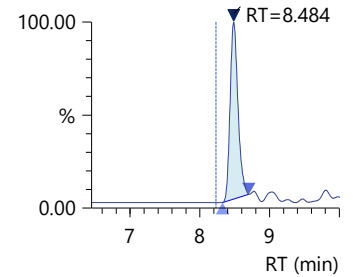

R1 442.30>176.20 (+)

6.19e2

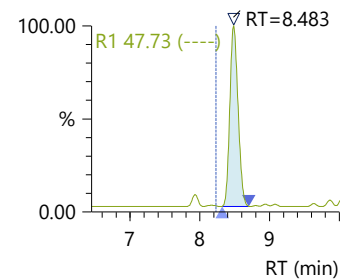

### Cynocobalmine\_B12

Conc. 3.4162

Area 329

R#1 0.00 (0.00)

Q 678.50>147.00 (+)

4.00e1

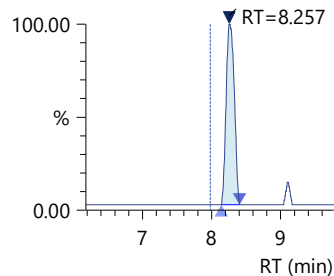

R1 678.50>359.00 (+)

0.00e0

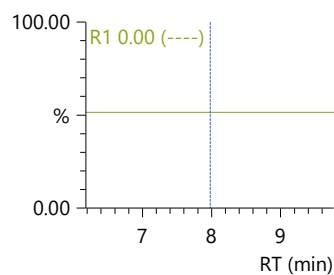

## WSV\_CC\_01\_13

Sample ID: 10ppb  
Date Acquired: 10/7/2023 6:41:23 PM  
Acquired by: System Administrator  
Method File: D:\Water Soluble Vitamins\_LCMSMS\LCMSMS\Aq Method\05102023\_WSV.lcm  
Data File: WSV\_CC\_01\_13  
Vial: 2 | Inj. Volume: 5.0000uL | Tray: 1

| Name                | Found RT | Area    | Ref 1 Actual Ratio | Conc.   | Dil. Factor |
|---------------------|----------|---------|--------------------|---------|-------------|
| Thiamine_B1         | 2.162    | 1214273 | 27.01              | 18.8464 | 1.00000     |
| Riboflavin_B2       | 9.007    | 45638   | 31.64              | 11.8719 | 1.00000     |
| Nicotinic Acid_B3   | 5.667    | 4944    | 0.00               | 3.4708  | 1.00000     |
| Nicotinamide_B3     | 5.677    | 211993  | 41.86              | -4.1012 | 1.00000     |
| Pantothenic Acid_B5 | 7.228    | 47518   | 21.82              | 12.1098 | 1.00000     |
| Pyridoxin_B6        | 4.590    | 777356  | 110.18             | 5.5979  | 1.00000     |
| Biotin_B7           | 8.819    | 175328  | 15.19              | 11.7726 | 1.00000     |
| Folic Acid_B9       | 8.229    | 19326   | 33.24              | 9.4023  | 1.00000     |
| Cynocobalmine_B12   | 7.986    | 6065    | 10.68              | 12.0197 | 1.00000     |

### Thiamine\_B1

Conc. 18.8464

Area 1214273

R#1 27.01 (0.00)

Q 265.20>122.10 (+)

8.85e4

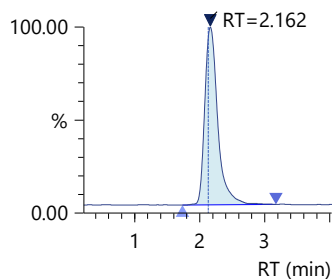

R1 265.20>144.10 (+)

2.43e4

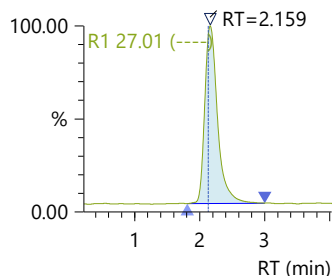

### Riboflavin\_B2

Conc. 11.8719

Area 45638

R#1 31.64 (0.00)

Q 377.30>243.05 (+)

5.32e3

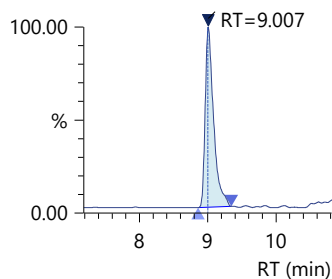

R1 377.30>172.15 (+)

1.69e3

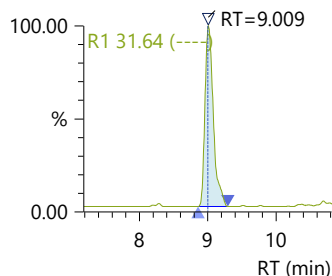

### Nicotinic Acid\_B3

Conc. 3.4708

Area 4944

R#1 0.00 (0.00)

Q 124.15>53.10 (+)

5.13e2

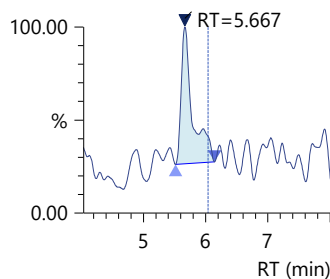

R1 124.15>78.05 (+)

1.07e3

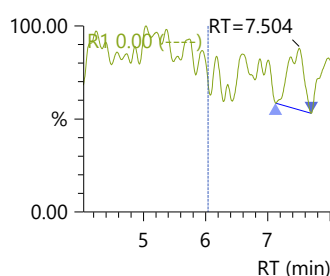

### Nicotinamide\_B3

Conc. -4.1012

Area 211993

R#1 41.86 (0.00)

Q 123.15>80.15 (+)

2.70e4

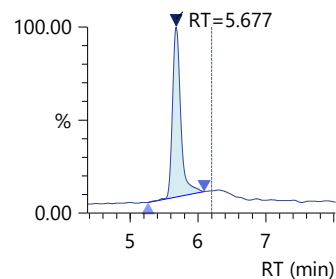

R1 123.15>53.10 (+)

1.07e4

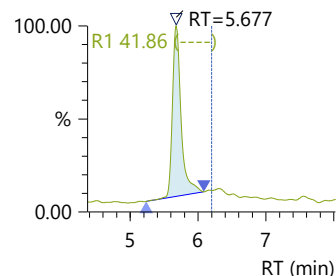

**WSV\_CC\_01\_13 (continued)**

**Pantothenic Acid\_B5**

Conc. 12.1098  
Area 47518  
R#1 21.82 (0.00)  
Q 220.20>90.10 (+) 4.40e3

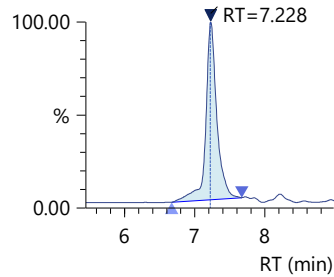

R1 220.20>72.00 (+) 1.10e3

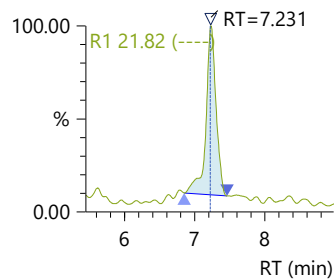

**Pyridoxin\_B6**

Conc. 5.5979  
Area 777356  
R#1 110.18 (0.00)  
Q 170.25>152.20 (+) 7.14e4

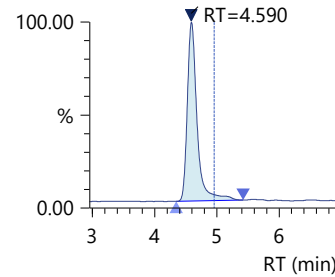

R1 170.25>134.10 (+) 7.77e4

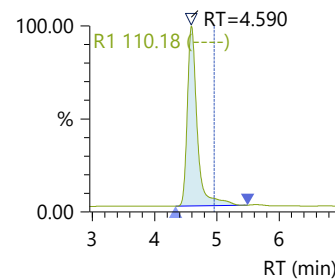

**Biotin\_B7**

Conc. 11.7726  
Area 175328  
R#1 15.19 (0.00)  
Q 245.25>227.10 (+) 1.87e4

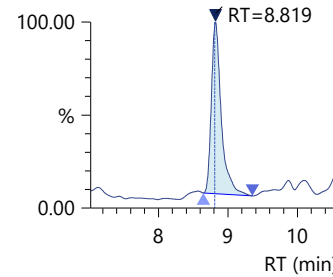

R1 245.25>97.10 (+) 2.69e3

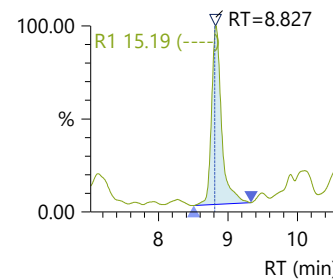

**Folic Acid\_B9**

Conc. 9.4023  
Area 19326  
R#1 33.24 (0.00)  
Q 442.30>295.20 (+) 1.88e3

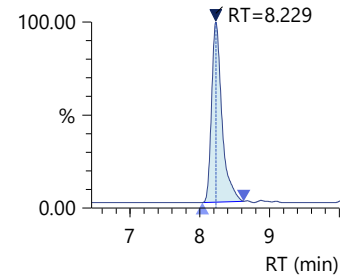

R1 442.30>176.20 (+) 6.74e2

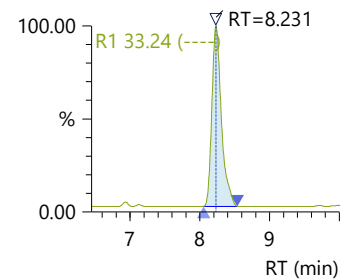

**Cynocobalmine\_B12**

Conc. 12.0197  
Area 6065  
R#1 10.68 (0.00)  
Q 678.50>147.00 (+) 6.66e2

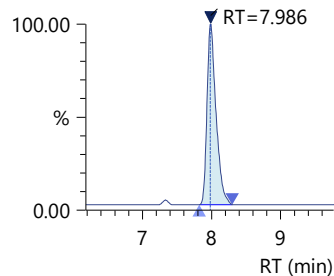

R1 678.50>359.00 (+) 7.80e1

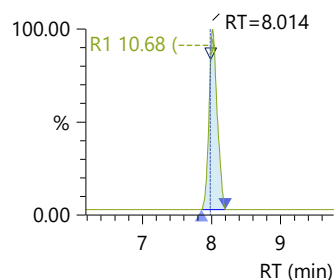

## WSV\_CC\_02\_14

Sample ID: 20ppb  
Date Acquired: 10/7/2023 6:56:53 PM  
Acquired by: System Administrator  
Method File: D:\Water Soluble Vitamins\_LCMSMS\LCMSMS\Aq Method\05102023\_WSV.lcm  
Data File: WSV\_CC\_02\_14  
Vial: 3 | Inj. Volume: 5.0000uL | Tray: 1

| Name                | Found RT | Area    | Ref 1 Actual Ratio | Conc.   | Dil. Factor |
|---------------------|----------|---------|--------------------|---------|-------------|
| Thiamine_B1         | 2.148    | 2436687 | 27.11              | 25.6640 | 1.00000     |
| Riboflavin_B2       | 9.006    | 87161   | 37.63              | 21.0239 | 1.00000     |
| Nicotinic Acid_B3   | 5.671    | 4774    | 68.45              | 2.6441  | 1.00000     |
| Nicotinamide_B3     | 5.668    | 428925  | 46.99              | 9.6462  | 1.00000     |
| Pantothenic Acid_B5 | 7.222    | 77087   | 23.64              | 20.7660 | 1.00000     |
| Pyridoxin_B6        | 4.564    | 1567319 | 110.03             | 16.5282 | 1.00000     |
| Biotin_B7           | 8.816    | 326727  | 15.84              | 22.0893 | 1.00000     |
| Folic Acid_B9       | 8.223    | 36627   | 31.84              | 19.3938 | 1.00000     |
| Cynocobalmine_B12   | 7.994    | 15974   | 9.15               | 26.8814 | 1.00000     |

### Thiamine\_B1

Conc. 25.6640  
Area 2436687  
R#1 27.11 (0.00)  
Q 265.20>122.10 (+)

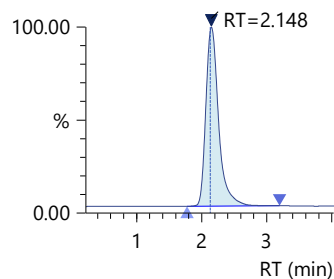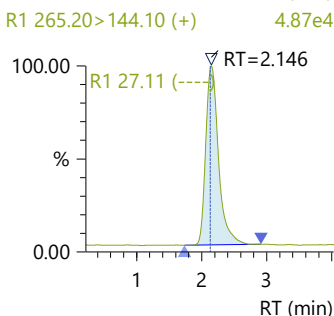

### Riboflavin\_B2

Conc. 21.0239  
Area 87161  
R#1 37.63 (0.00)  
Q 377.30>243.05 (+)

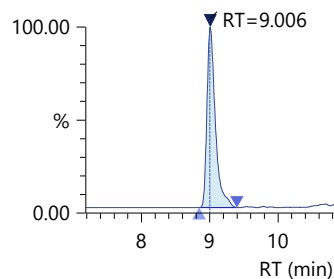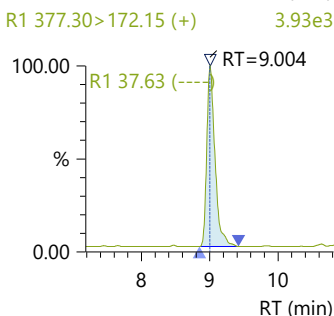

### Nicotinic Acid\_B3

Conc. 2.6441  
Area 4774  
R#1 68.45 (0.00)  
Q 124.15>53.10 (+)

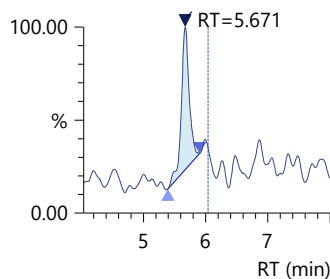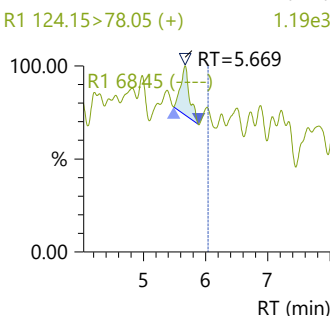

### Nicotinamide\_B3

Conc. 9.6462  
Area 428925  
R#1 46.99 (0.00)  
Q 123.15>80.15 (+)

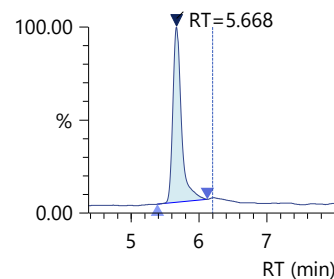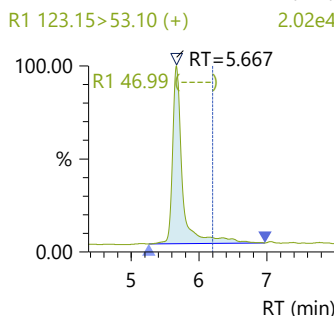

## WSV\_CC\_02\_14 (continued)

### Pantothenic Acid\_B5

Conc. 20.7660

Area 77087

R#1 23.64 (0.00)

Q 220.20>90.10 (+)

8.29e3

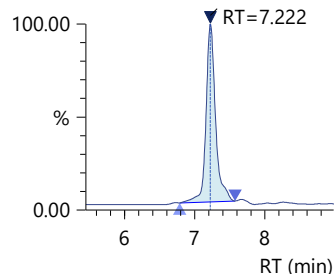

R1 220.20>72.00 (+)

1.97e3

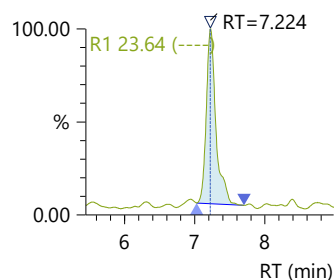

### Pyridoxin\_B6

Conc. 16.5282

Area 1567319

R#1 110.03 (0.00)

Q 170.25>152.20 (+)

1.44e5

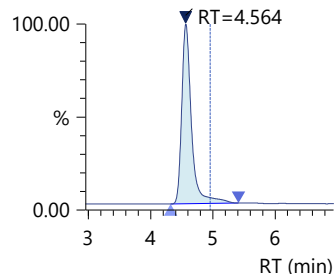

R1 170.25>134.10 (+)

1.56e5

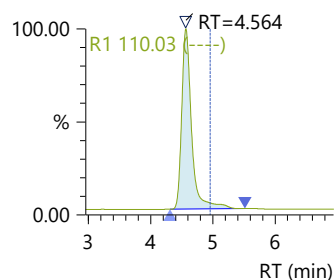

### Biotin\_B7

Conc. 22.0893

Area 326727

R#1 15.84 (0.00)

Q 245.25>227.10 (+)

3.25e4

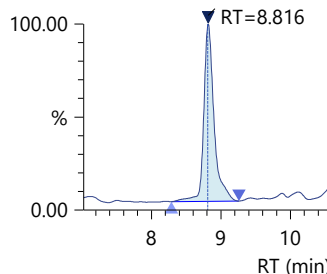

R1 245.25>97.10 (+)

5.20e3

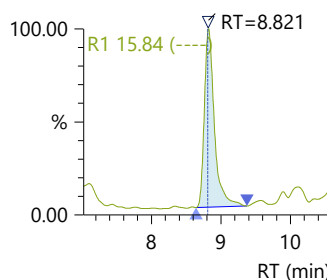

### Folic Acid\_B9

Conc. 19.3938

Area 36627

R#1 31.84 (0.00)

Q 442.30>295.20 (+)

3.76e3

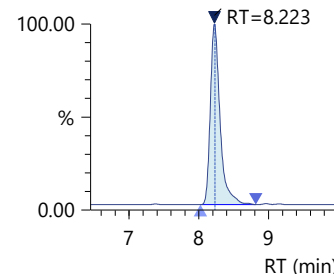

R1 442.30>176.20 (+)

1.23e3

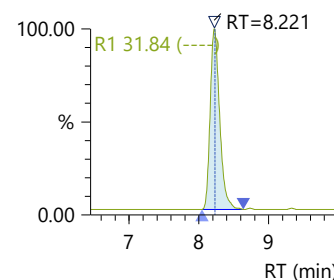

### Cynocobalmine\_B12

Conc. 26.8814

Area 15974

R#1 9.15 (0.00)

Q 678.50>147.00 (+)

1.55e3

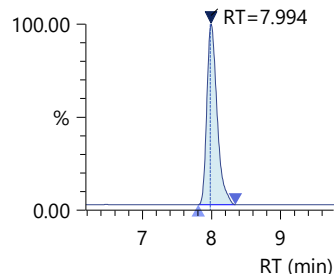

R1 678.50>359.00 (+)

2.04e2

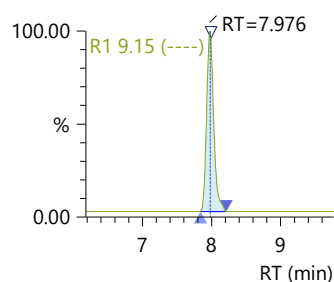

## WSV\_CC\_03\_15

Sample ID: 30ppb  
Date Acquired: 10/7/2023 7:12:26 PM  
Acquired by: System Administrator  
Method File: D:\Water Soluble Vitamins\_LCMSMS\LCMSMS\Aq Method\05102023\_WSV.lcm  
Data File: WSV\_CC\_03\_15  
Vial: 4 | Inj. Volume: 5.0000uL | Tray: 1

| Name                | Found RT | Area    | Ref 1 Actual Ratio | Conc.   | Dil. Factor |
|---------------------|----------|---------|--------------------|---------|-------------|
| Thiamine_B1         | 2.156    | 4350882 | 27.15              | 36.3399 | 1.00000     |
| Riboflavin_B2       | 9.002    | 129097  | 38.41              | 30.2667 | 1.00000     |
| Nicotinic Acid_B3   | 5.669    | 12213   | 33.22              | 38.9463 | 1.00000     |
| Nicotinamide_B3     | 5.671    | 680799  | 39.55              | 25.6081 | 1.00000     |
| Pantothenic Acid_B5 | 7.223    | 111141  | 22.65              | 30.7350 | 1.00000     |
| Pyridoxin_B6        | 4.571    | 2326650 | 111.97             | 27.0346 | 1.00000     |
| Biotin_B7           | 8.815    | 436553  | 15.67              | 29.5731 | 1.00000     |
| Folic Acid_B9       | 8.222    | 55092   | 30.20              | 30.0577 | 1.00000     |
| Cynocobalmine_B12   | 7.984    | 16470   | 18.14              | 27.6249 | 1.00000     |

### Thiamine\_B1

Conc. 36.3399  
Area 4350882  
R#1 27.15 (0.00)  
Q 265.20>122.10 (+)

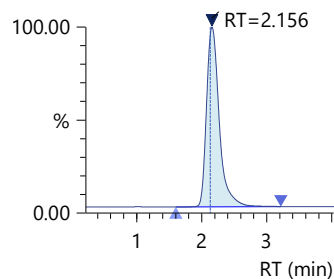

R1 265.20>144.10 (+) 8.74e4

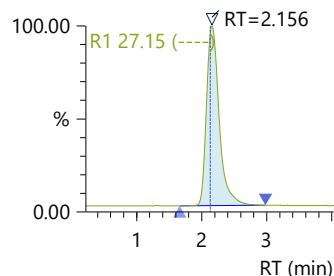

### Riboflavin\_B2

Conc. 30.2667  
Area 129097  
R#1 38.41 (0.00)  
Q 377.30>243.05 (+)

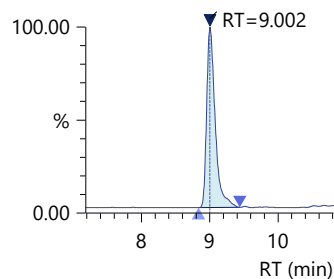

R1 377.30>172.15 (+) 5.51e3

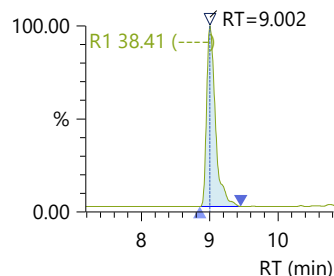

### Nicotinic Acid\_B3

Conc. 38.9463  
Area 12213  
R#1 33.22 (0.00)  
Q 124.15>53.10 (+)

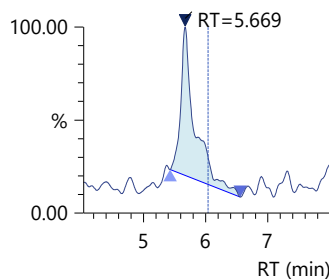

R1 124.15>78.05 (+) 1.39e3

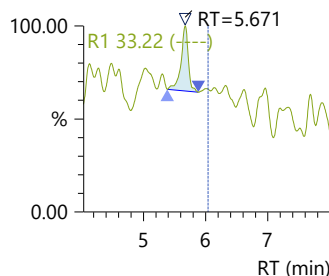

### Nicotinamide\_B3

Conc. 25.6081  
Area 680799  
R#1 39.55 (0.00)  
Q 123.15>80.15 (+)

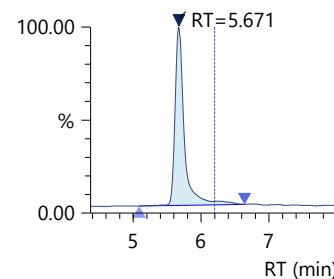

R1 123.15>53.10 (+) 2.91e4

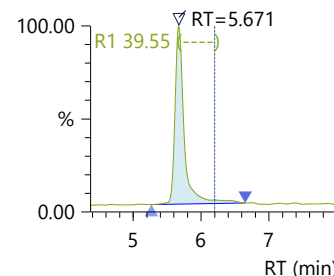

## WSV\_CC\_03\_15 (continued)

### Pantothenic Acid\_B5

Conc. 30.7350

Area 111141

R#1 22.65 (0.00)

Q 220.20>90.10 (+)

1.18e4

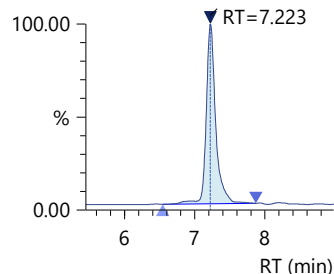

R1 220.20>72.00 (+)

2.79e3

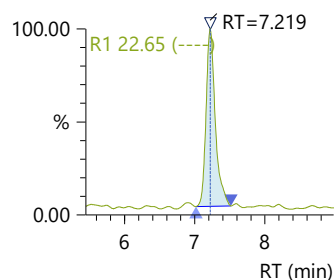

### Pyridoxin\_B6

Conc. 27.0346

Area 2326650

R#1 111.97 (0.00)

Q 170.25>152.20 (+)

2.09e5

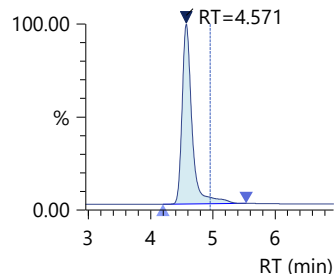

R1 170.25>134.10 (+)

2.29e5

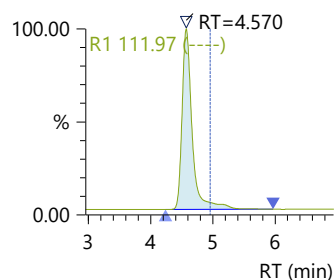

### Biotin\_B7

Conc. 29.5731

Area 436553

R#1 15.67 (0.00)

Q 245.25>227.10 (+)

4.62e4

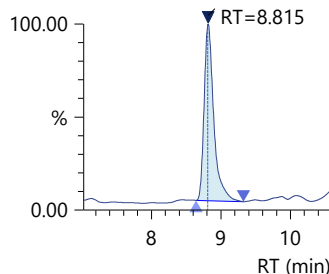

R1 245.25>97.10 (+)

7.12e3

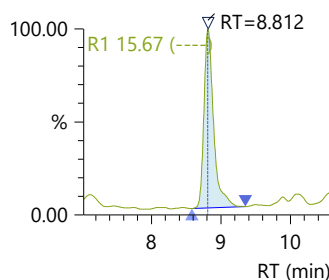

### Folic Acid\_B9

Conc. 30.0577

Area 55092

R#1 30.20 (0.00)

Q 442.30>295.20 (+)

5.34e3

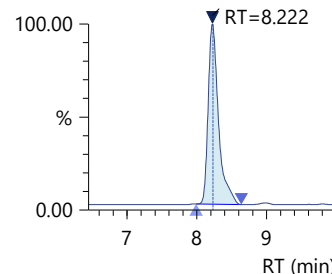

R1 442.30>176.20 (+)

1.74e3

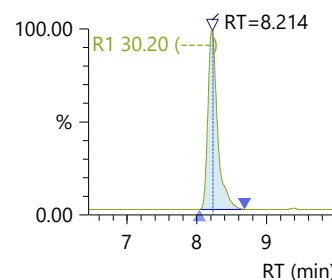

### Cynocobalmine\_B12

Conc. 27.6249

Area 16470

R#1 18.14 (0.00)

Q 678.50>147.00 (+)

1.71e3

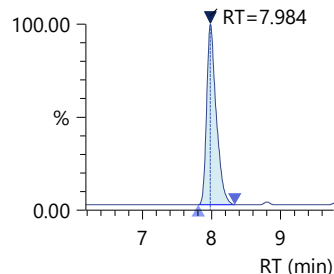

R1 678.50>359.00 (+)

3.62e2

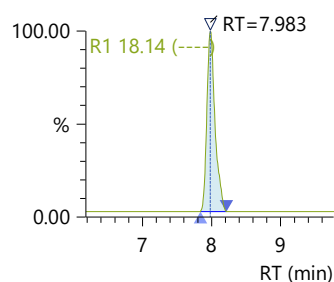

## WSV\_CC\_04\_16

Sample ID: 40ppb  
Date Acquired: 10/7/2023 7:27:57 PM  
Acquired by: System Administrator  
Method File: D:\Water Soluble Vitamins\_LCMSMS\LCMSMS\Aq Method\05102023\_WSV.lcm  
Data File: WSV\_CC\_04\_16  
Vial: 5 | Inj. Volume: 5.0000uL | Tray: 1

| Name                | Found RT | Area    | Ref 1 Actual Ratio | Conc.   | Dil. Factor |
|---------------------|----------|---------|--------------------|---------|-------------|
| Thiamine_B1         | 2.147    | 5229715 | 27.46              | 41.2414 | 1.00000     |
| Riboflavin_B2       | 9.001    | 179570  | 36.20              | 41.3913 | 1.00000     |
| Nicotinic Acid_B3   | 5.660    | 11885   | 0.00               | 37.3419 | 1.00000     |
| Nicotinamide_B3     | 5.664    | 902266  | 35.30              | 39.6430 | 1.00000     |
| Pantothenic Acid_B5 | 7.221    | 148049  | 21.68              | 41.5396 | 1.00000     |
| Pyridoxin_B6        | 4.568    | 3130510 | 111.72             | 38.1572 | 1.00000     |
| Biotin_B7           | 8.814    | 599629  | 14.56              | 40.6854 | 1.00000     |
| Folic Acid_B9       | 8.219    | 69947   | 30.57              | 38.6367 | 1.00000     |
| Cynocobalmine_B12   | 8.001    | 25101   | 15.16              | 40.5708 | 1.00000     |

### Thiamine\_B1

Conc. 41.2414  
Area 5229715  
R#1 27.46 (0.00)  
Q 265.20>122.10 (+)

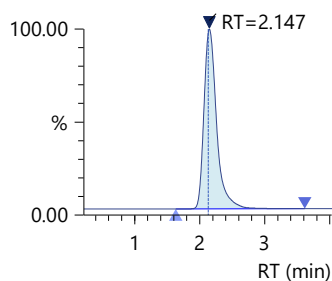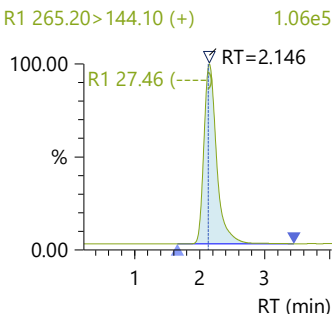

### Riboflavin\_B2

Conc. 41.3913  
Area 179570  
R#1 36.20 (0.00)  
Q 377.30>243.05 (+)

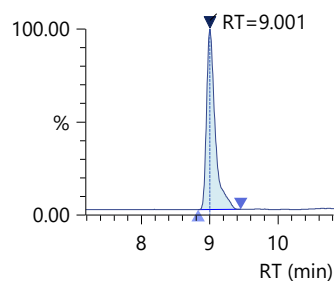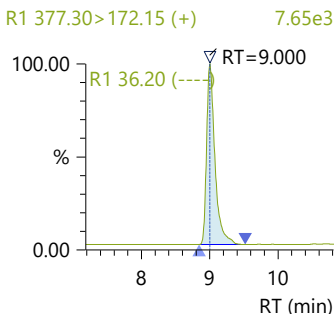

### Nicotinic Acid\_B3

Conc. 37.3419  
Area 11885  
R#1 0.00 (0.00)  
Q 124.15>53.10 (+)

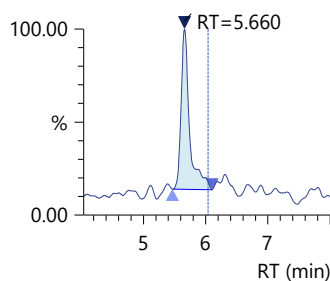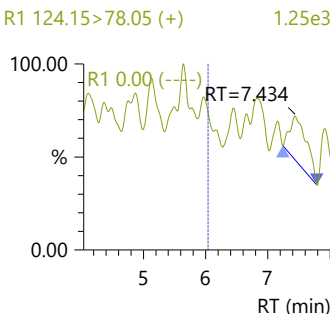

### Nicotinamide\_B3

Conc. 39.6430  
Area 902266  
R#1 35.30 (0.00)  
Q 123.15>80.15 (+)

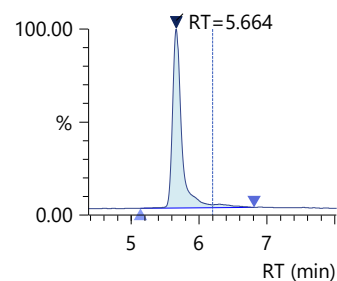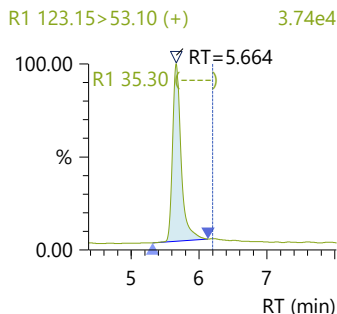



**WSV\_CC\_04\_16 (continued)**

**Pantothenic Acid\_B5**

Conc. 41.5396  
Area 148049  
R#1 21.68 (0.00)  
Q 220.20>90.10 (+) 1.63e4

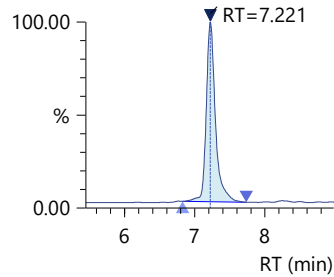

R1 220.20>72.00 (+) 3.51e3

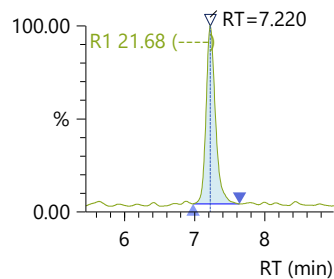

**Pyridoxin\_B6**

Conc. 38.1572  
Area 3130510  
R#1 111.72 (0.00)  
Q 170.25>152.20 (+) 2.88e5

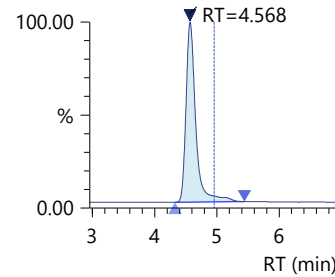

R1 170.25>134.10 (+) 3.14e5

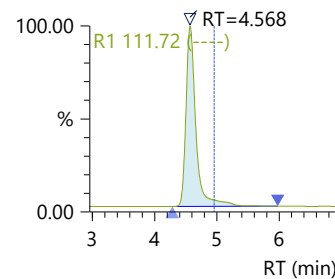

**Biotin\_B7**

Conc. 40.6854  
Area 599629  
R#1 14.56 (0.00)  
Q 245.25>227.10 (+) 6.45e4

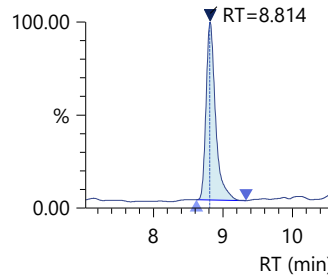

R1 245.25>97.10 (+) 9.34e3

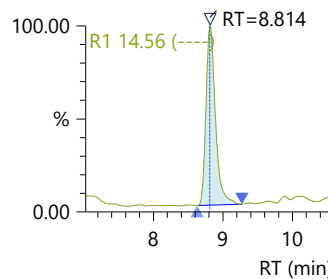

**Folic Acid\_B9**

Conc. 38.6367  
Area 69947  
R#1 30.57 (0.00)  
Q 442.30>295.20 (+) 6.83e3

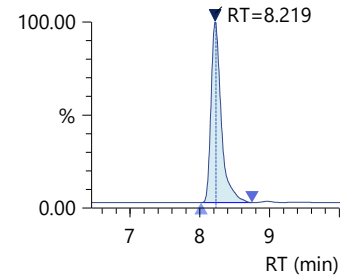

R1 442.30>176.20 (+) 2.24e3

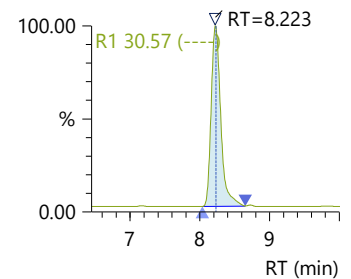

**Cynocobalmine\_B12**

Conc. 40.5708  
Area 25101  
R#1 15.16 (0.00)  
Q 678.50>147.00 (+) 2.48e3

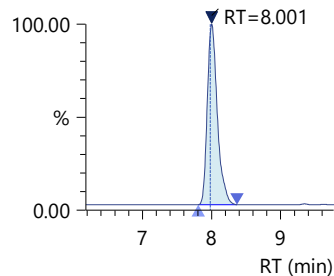

R1 678.50>359.00 (+) 4.27e2

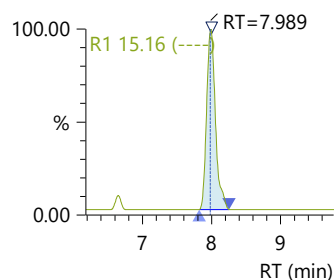

## WSV\_CC\_05\_17

Sample ID: 50ppb  
Date Acquired: 10/7/2023 7:43:27 PM  
Acquired by: System Administrator  
Method File: D:\Water Soluble Vitamins\_LCMSMS\LCMSMS\Aq Method\05102023\_WSV.lcm  
Data File: WSV\_CC\_05\_17  
Vial: 6 | Inj. Volume: 5.0000uL | Tray: 1

| Name                | Found RT | Area    | Ref 1 Actual Ratio | Conc.   | Dil. Factor |
|---------------------|----------|---------|--------------------|---------|-------------|
| Thiamine_B1         | 2.147    | 6251978 | 27.39              | 46.9428 | 1.00000     |
| Riboflavin_B2       | 8.992    | 219031  | 40.53              | 50.0886 | 1.00000     |
| Nicotinic Acid_B3   | 5.651    | 10832   | 36.78              | 32.2068 | 1.00000     |
| Nicotinamide_B3     | 5.655    | 1098420 | 36.49              | 52.0737 | 1.00000     |
| Pantothenic Acid_B5 | 7.208    | 177834  | 24.11              | 50.2593 | 1.00000     |
| Pyridoxin_B6        | 4.550    | 3962245 | 109.66             | 49.6654 | 1.00000     |
| Biotin_B7           | 8.805    | 707663  | 16.43              | 48.0470 | 1.00000     |
| Folic Acid_B9       | 8.210    | 92363   | 26.88              | 51.5824 | 1.00000     |
| Cynocobalmine_B12   | 7.986    | 35014   | 9.82               | 55.4392 | 1.00000     |

### Thiamine\_B1

Conc. 46.9428  
Area 6251978  
R#1 27.39 (0.00)  
Q 265.20>122.10 (+)

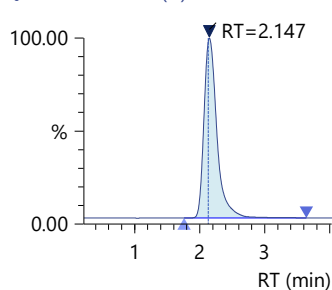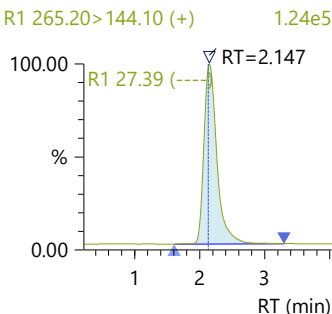

### Riboflavin\_B2

Conc. 50.0886  
Area 219031  
R#1 40.53 (0.00)  
Q 377.30>243.05 (+)

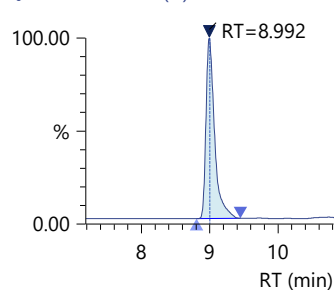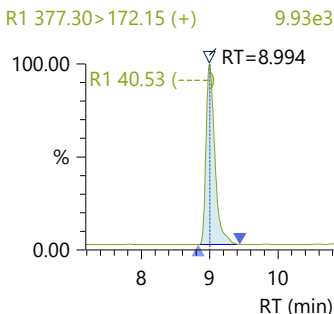

### Nicotinic Acid\_B3

Conc. 32.2068  
Area 10832  
R#1 36.78 (0.00)  
Q 124.15>53.10 (+)

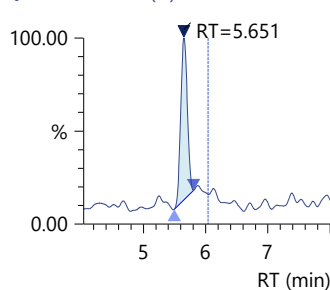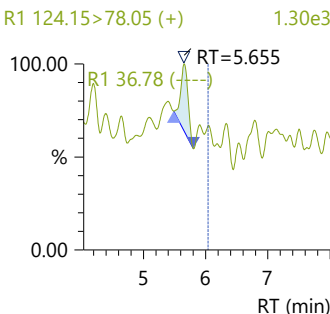

### Nicotinamide\_B3

Conc. 52.0737  
Area 1098420  
R#1 36.49 (0.00)  
Q 123.15>80.15 (+)

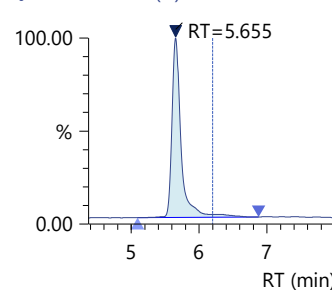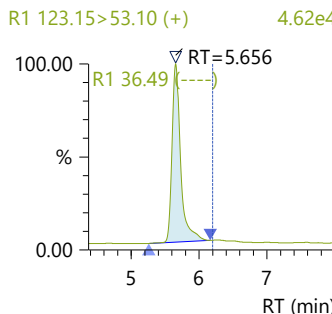

## WSV\_CC\_05\_17 (continued)

### Pantothenic Acid\_B5

Conc. 50.2593  
Area 177834  
R#1 24.11 (0.00)  
Q 220.20>90.10 (+) 1.92e4

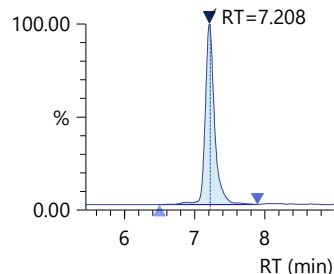

R1 220.20>72.00 (+) 4.79e3

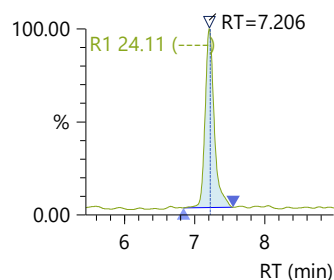

### Pyridoxin\_B6

Conc. 49.6654  
Area 3962245  
R#1 109.66 (0.00)  
Q 170.25>152.20 (+) 3.56e5

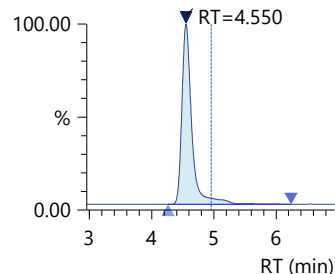

R1 170.25>134.10 (+) 3.94e5

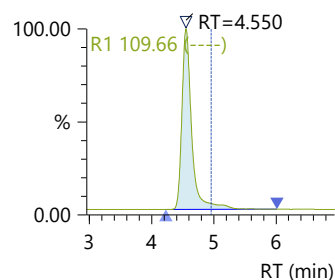

### Biotin\_B7

Conc. 48.0470  
Area 707663  
R#1 16.43 (0.00)  
Q 245.25>227.10 (+) 7.56e4

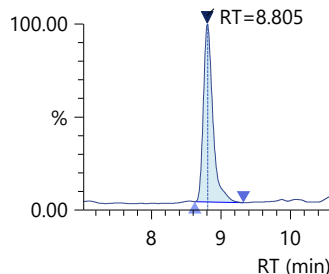

R1 245.25>97.10 (+) 1.20e4

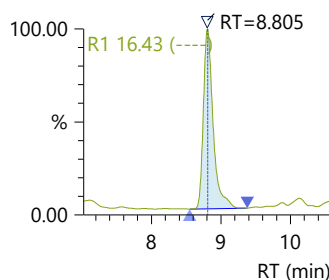

### Folic Acid\_B9

Conc. 51.5824  
Area 92363  
R#1 26.88 (0.00)  
Q 442.30>295.20 (+) 9.13e3

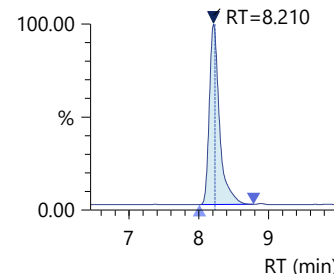

R1 442.30>176.20 (+) 2.53e3

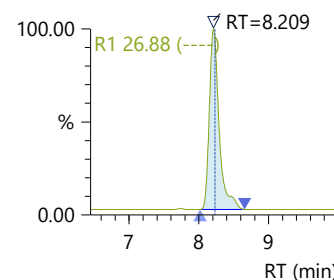

### Cynocobalmine\_B12

Conc. 55.4392  
Area 35014  
R#1 9.82 (0.00)  
Q 678.50>147.00 (+) 3.83e3

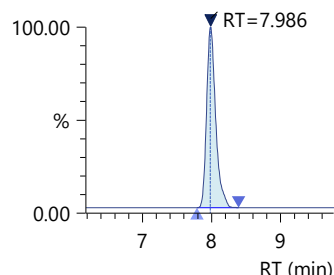

R1 678.50>359.00 (+) 3.51e2

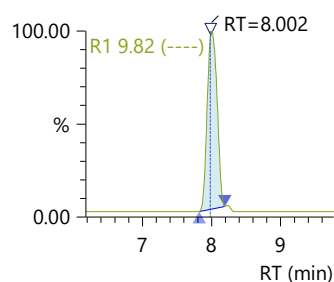

## WSV\_CC\_06\_18

Sample ID: 70ppb  
Date Acquired: 10/7/2023 7:58:59 PM  
Acquired by: System Administrator  
Method File: D:\Water Soluble Vitamins\_LCMSMS\LCMSMS\Aq Method\05102023\_WSV.lcm  
Data File: WSV\_CC\_06\_18  
Vial: 7 | Inj. Volume: 5.0000uL | Tray: 1

| Name                | Found RT | Area    | Ref 1 Actual Ratio | Conc.   | Dil. Factor |
|---------------------|----------|---------|--------------------|---------|-------------|
| Thiamine_B1         | 2.141    | 9346349 | 27.55              | 64.2008 | 1.00000     |
| Riboflavin_B2       | 8.988    | 302756  | 39.26              | 68.5419 | 1.00000     |
| Nicotinic Acid_B3   | 5.644    | 19069   | 28.88              | 72.4017 | 1.00000     |
| Nicotinamide_B3     | 5.650    | 1470853 | 36.96              | 75.6757 | 1.00000     |
| Pantothenic Acid_B5 | 7.206    | 237363  | 25.26              | 67.6860 | 1.00000     |
| Pyridoxin_B6        | 4.533    | 5568740 | 109.70             | 71.8935 | 1.00000     |
| Biotin_B7           | 8.800    | 1024704 | 14.95              | 69.6509 | 1.00000     |
| Folic Acid_B9       | 8.203    | 121448  | 35.20              | 68.3791 | 1.00000     |
| Cynocobalmine_B12   | 7.980    | 45206   | 13.43              | 70.7252 | 1.00000     |

### Thiamine\_B1

Conc. 64.2008  
Area 9346349  
R#1 27.55 (0.00)  
Q 265.20>122.10 (+)

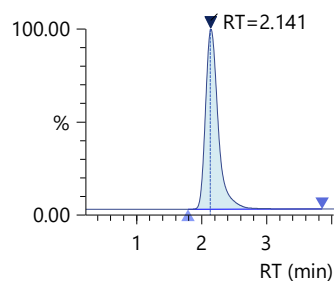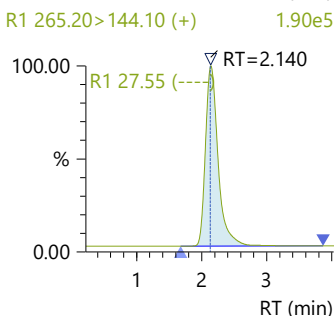

### Riboflavin\_B2

Conc. 68.5419  
Area 302756  
R#1 39.26 (0.00)  
Q 377.30>243.05 (+)

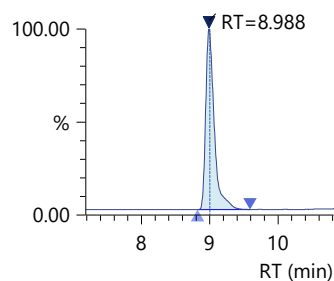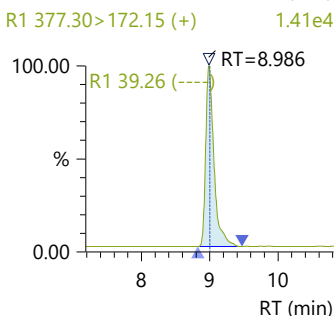

### Nicotinic Acid\_B3

Conc. 72.4017  
Area 19069  
R#1 28.88 (0.00)  
Q 124.15>53.10 (+)

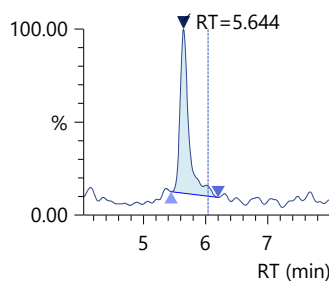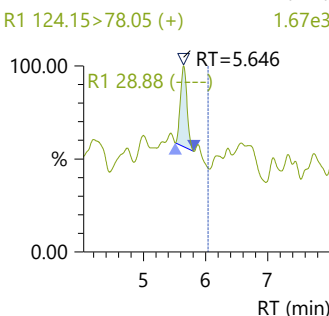

### Nicotinamide\_B3

Conc. 75.6757  
Area 1470853  
R#1 36.96 (0.00)  
Q 123.15>80.15 (+)

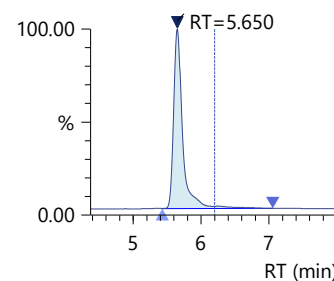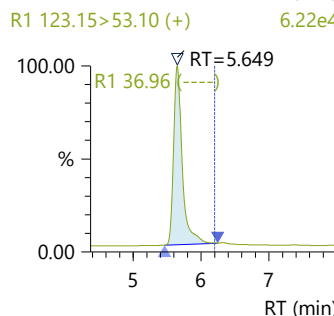

## WSV\_CC\_06\_18 (continued)

### Pantothenic Acid\_B5

Conc. 67.6860

Area 237363

R#1 25.26 (0.00)

Q 220.20>90.10 (+)

2.58e4

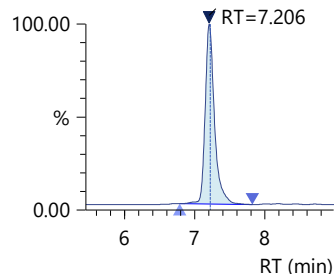

R1 220.20>72.00 (+)

6.50e3

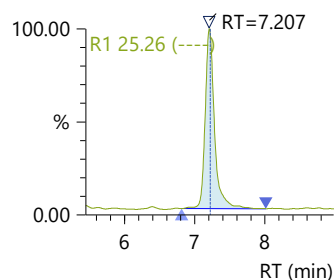

### Pyridoxin\_B6

Conc. 71.8935

Area 5568740

R#1 109.70 (0.00)

Q 170.25>152.20 (+)

4.95e5

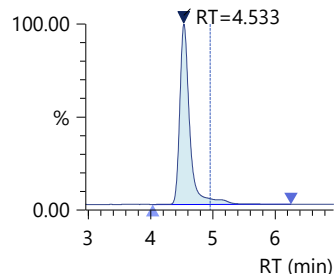

R1 170.25>134.10 (+)

5.47e5

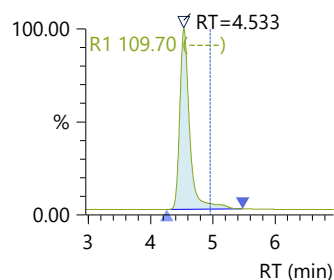

### Biotin\_B7

Conc. 69.6509

Area 1024704

R#1 14.95 (0.00)

Q 245.25>227.10 (+)

1.06e5

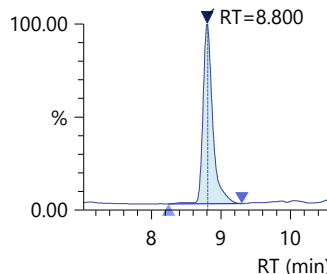

R1 245.25>97.10 (+)

1.63e4

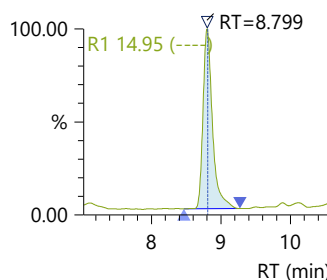

### Folic Acid\_B9

Conc. 68.3791

Area 121448

R#1 35.20 (0.00)

Q 442.30>295.20 (+)

1.23e4

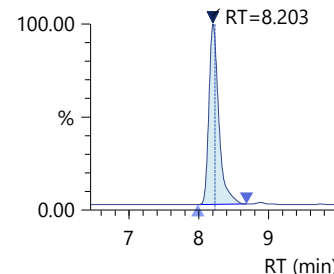

R1 442.30>176.20 (+)

4.29e3

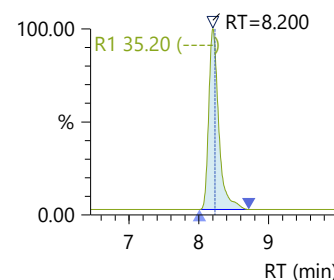

### Cynocobalmine\_B12

Conc. 70.7252

Area 45206

R#1 13.43 (0.00)

Q 678.50>147.00 (+)

4.67e3

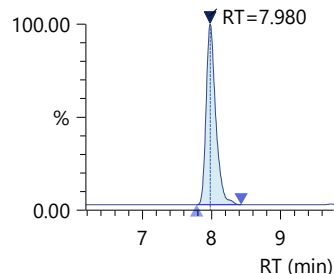

R1 678.50>359.00 (+)

6.21e2

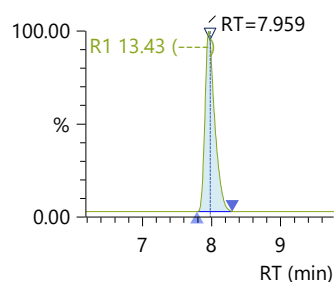

## WSV\_CC\_07\_19

Sample ID: 100ppb  
Date Acquired: 10/7/2023 8:14:30 PM  
Acquired by: System Administrator  
Method File: D:\Water Soluble Vitamins\_LCMSMS\LCMSMS\Aq Method\05102023\_WSV.lcm  
Data File: WSV\_CC\_07\_19  
Vial: 8 | Inj. Volume: 5.0000uL | Tray: 1

| Name                | Found RT | Area     | Ref 1 Actual Ratio | Conc.    | Dil. Factor |
|---------------------|----------|----------|--------------------|----------|-------------|
| Thiamine_B1         | 2.143    | 13397264 | 27.43              | 86.7936  | 1.00000     |
| Riboflavin_B2       | 8.987    | 419111   | 39.99              | 94.1872  | 1.00000     |
| Nicotinic Acid_B3   | 5.637    | 27651    | 37.02              | 114.2796 | 1.00000     |
| Nicotinamide_B3     | 5.643    | 2055178  | 38.30              | 112.7058 | 1.00000     |
| Pantothenic Acid_B5 | 7.205    | 343386   | 24.88              | 98.7237  | 1.00000     |
| Pyridoxin_B6        | 4.529    | 7928546  | 109.64             | 104.5448 | 1.00000     |
| Biotin_B7           | 8.801    | 1439915  | 14.92              | 97.9442  | 1.00000     |
| Folic Acid_B9       | 8.205    | 185355   | 30.56              | 105.2866 | 1.00000     |
| Cynocobalmine_B12   | 7.982    | 54200    | 15.29              | 84.2160  | 1.00000     |

### Thiamine\_B1

Conc. 86.7936  
Area 13397264  
R#1 27.43 (0.00)  
Q 265.20>122.10 (+)

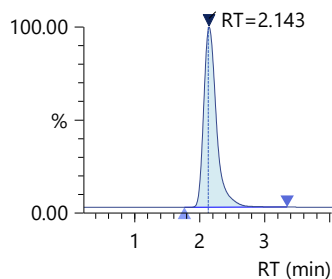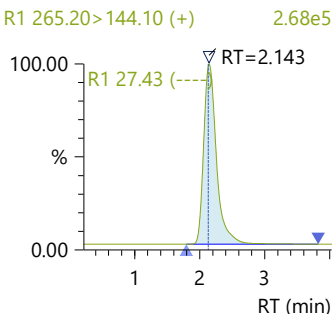

### Riboflavin\_B2

Conc. 94.1872  
Area 419111  
R#1 39.99 (0.00)  
Q 377.30>243.05 (+)

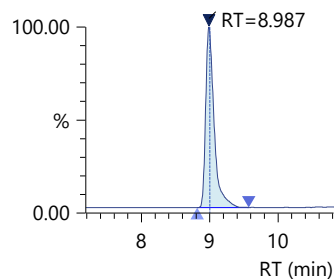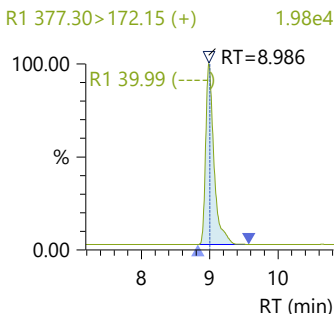

### Nicotinic Acid\_B3

Conc. 114.2796  
Area 27651  
R#1 37.02 (0.00)  
Q 124.15>53.10 (+)

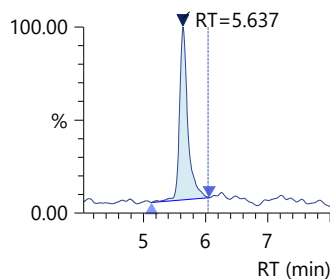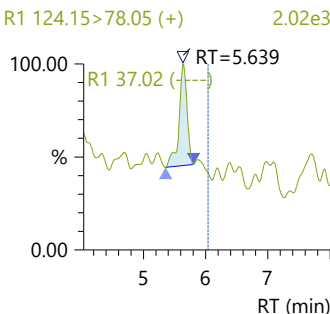

### Nicotinamide\_B3

Conc. 112.7058  
Area 2055178  
R#1 38.30 (0.00)  
Q 123.15>80.15 (+)

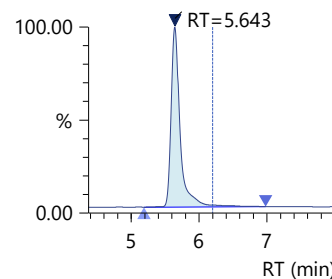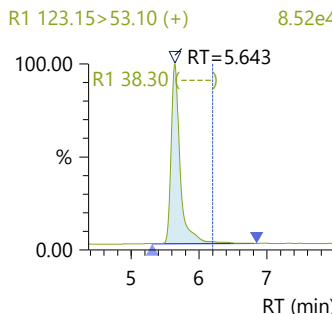

## WSV\_CC\_07\_19 (continued)

### Pantothenic Acid\_B5

Conc. 98.7237

Area 343386

R#1 24.88 (0.00)

Q 220.20>90.10 (+)

3.78e4

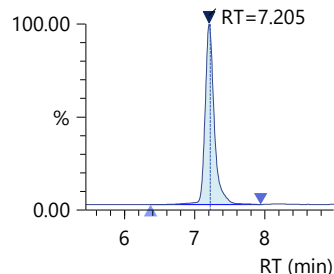

R1 220.20>72.00 (+)

9.99e3

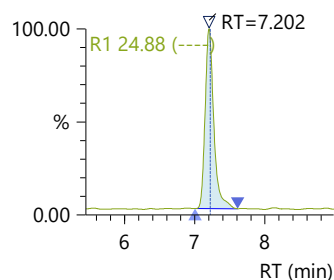

### Pyridoxin\_B6

Conc. 104.5448

Area 7928546

R#1 109.64 (0.00)

Q 170.25>152.20 (+)

7.04e5

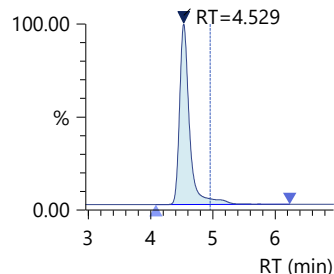

R1 170.25>134.10 (+)

7.72e5

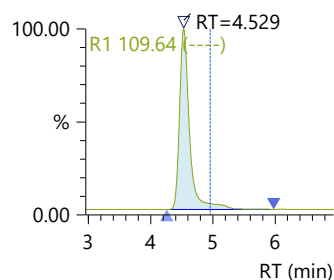

### Biotin\_B7

Conc. 97.9442

Area 1439915

R#1 14.92 (0.00)

Q 245.25>227.10 (+)

1.54e5

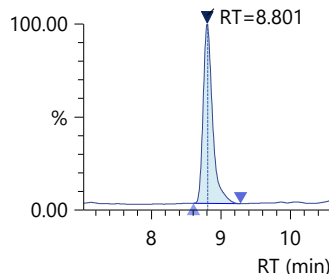

R1 245.25>97.10 (+)

2.25e4

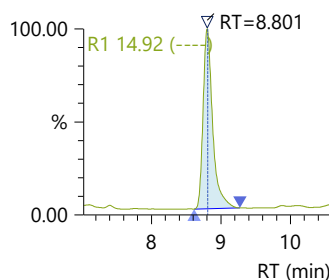

### Folic Acid\_B9

Conc. 105.2866

Area 185355

R#1 30.56 (0.00)

Q 442.30>295.20 (+)

1.87e4

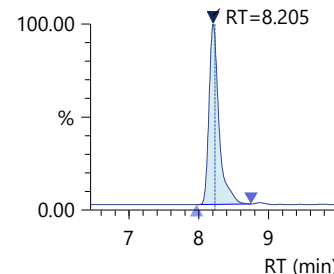

R1 442.30>176.20 (+)

5.78e3

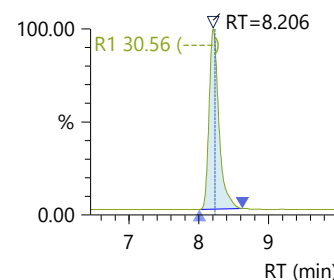

### Cynocobalmine\_B12

Conc. 84.2160

Area 54200

R#1 15.29 (0.00)

Q 678.50>147.00 (+)

5.64e3

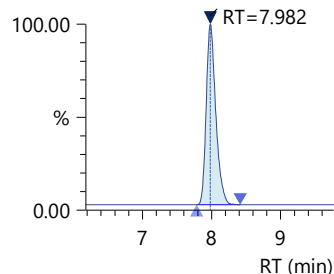

R1 678.50>359.00 (+)

8.99e2

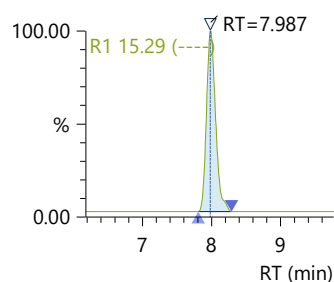

## WSV\_CC\_08\_20

Sample ID: 200ppb  
Date Acquired: 10/7/2023 8:30:03 PM  
Acquired by: System Administrator  
Method File: D:\Water Soluble Vitamins\_LCMSMS\LCMSMS\Aq Method\05102023\_WSV.lcm  
Data File: WSV\_CC\_08\_20  
Vial: 9 | Inj. Volume: 5.0000uL | Tray: 1

| Name                | Found RT | Area     | Ref 1 Actual Ratio | Conc.    | Dil. Factor |
|---------------------|----------|----------|--------------------|----------|-------------|
| Thiamine_B1         | 2.134    | 32827261 | 27.11              | 195.1591 | 1.00000     |
| Riboflavin_B2       | 9.002    | 910360   | 37.81              | 202.4605 | 1.00000     |
| Nicotinic Acid_B3   | 5.649    | 51917    | 36.41              | 232.7016 | 1.00000     |
| Nicotinamide_B3     | 5.652    | 3729938  | 38.99              | 218.8393 | 1.00000     |
| Pantothenic Acid_B5 | 7.216    | 677198   | 24.97              | 196.4456 | 1.00000     |
| Pyridoxin_B6        | 4.524    | 15690648 | 110.17             | 211.9445 | 1.00000     |
| Biotin_B7           | 8.815    | 2931012  | 15.14              | 199.5506 | 1.00000     |
| Folic Acid_B9       | 8.221    | 343897   | 33.63              | 196.8469 | 1.00000     |
| Cynocobalmine_B12   | 7.997    | 131652   | 16.86              | 200.3838 | 1.00000     |

### Thiamine\_B1

Conc. 195.1591

Area 32827261

R#1 27.11 (0.00)

Q 265.20>122.10 (+)

2.46e6

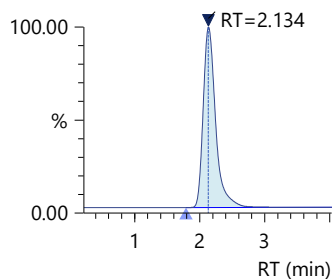

R1 265.20>144.10 (+)

6.64e5

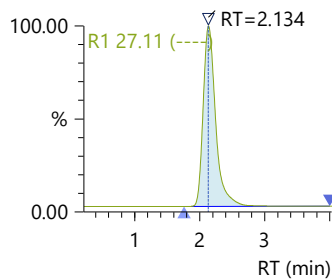

### Riboflavin\_B2

Conc. 202.4605

Area 910360

R#1 37.81 (0.00)

Q 377.30>243.05 (+)

1.06e5

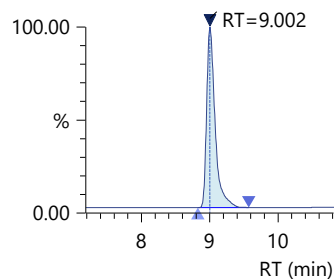

R1 377.30>172.15 (+)

3.95e4

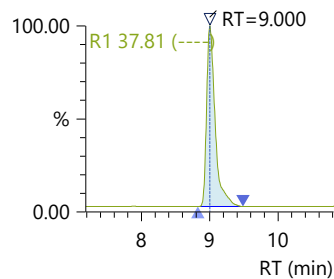

### Nicotinic Acid\_B3

Conc. 232.7016

Area 51917

R#1 36.41 (0.00)

Q 124.15>53.10 (+)

5.46e3

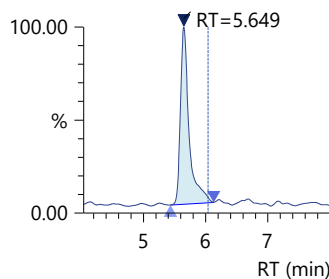

R1 124.15>78.05 (+)

2.60e3

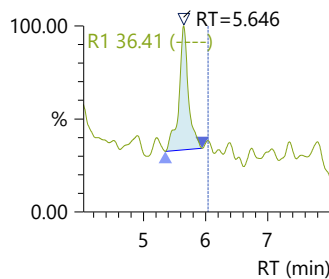

### Nicotinamide\_B3

Conc. 218.8393

Area 3729938

R#1 38.99 (0.00)

Q 123.15>80.15 (+)

3.98e5

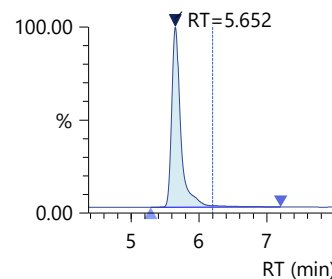

R1 123.15>53.10 (+)

1.55e5

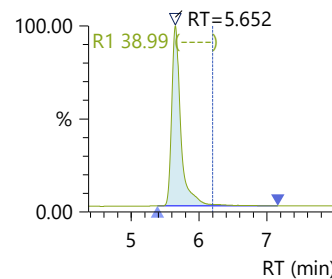



## WSV\_CC\_08\_20 (continued)

### Pantothenic Acid\_B5

Conc. 196.4456

Area 677198

R#1 24.97 (0.00)

Q 220.20>90.10 (+)

7.59e4

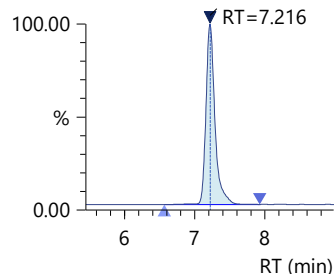

R1 220.20>72.00 (+)

1.94e4

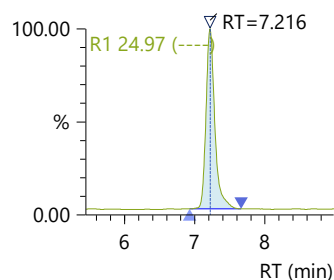

### Pyridoxin\_B6

Conc. 211.9445

Area 15690648

R#1 110.17 (0.00)

Q 170.25>152.20 (+)

1.38e6

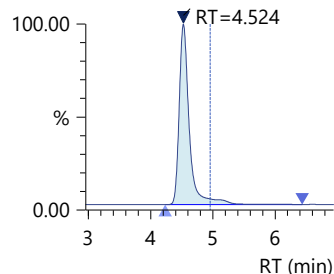

R1 170.25>134.10 (+)

1.53e6

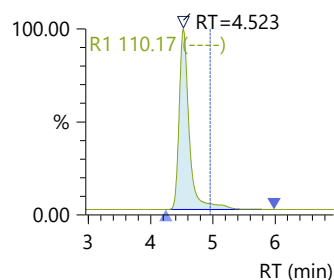

### Biotin\_B7

Conc. 199.5506

Area 2931012

R#1 15.14 (0.00)

Q 245.25>227.10 (+)

3.09e5

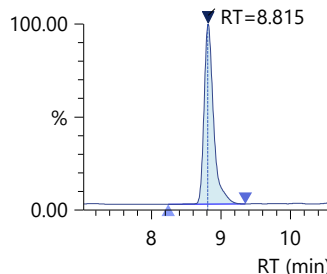

R1 245.25>97.10 (+)

4.74e4

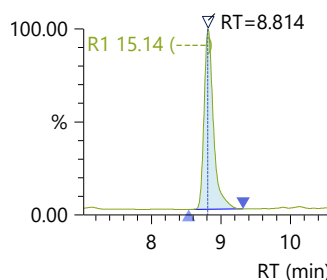

### Folic Acid\_B9

Conc. 196.8469

Area 343897

R#1 33.63 (0.00)

Q 442.30>295.20 (+)

3.45e4

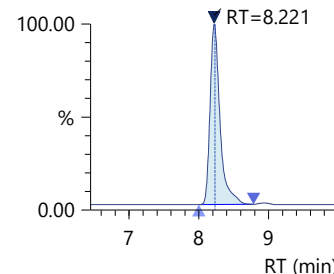

R1 442.30>176.20 (+)

1.16e4

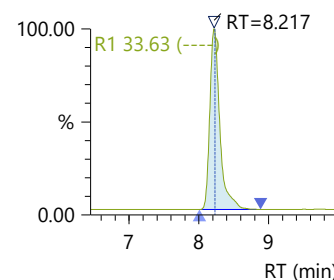

### Cynocobalmine\_B12

Conc. 200.3838

Area 131652

R#1 16.86 (0.00)

Q 678.50>147.00 (+)

1.37e4

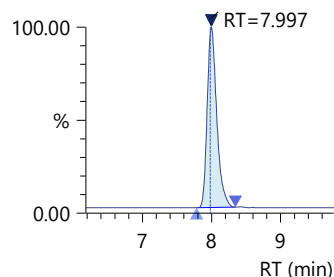

R1 678.50>359.00 (+)

2.22e3

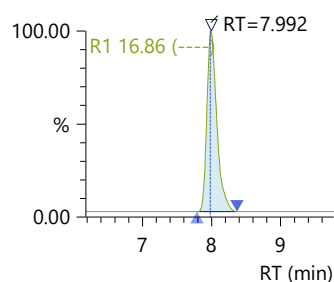

## WSV\_CC\_09\_21

Sample ID: 500ppb  
Date Acquired: 10/7/2023 8:45:39 PM  
Acquired by: System Administrator  
Method File: D:\Water Soluble Vitamins\_LCMSMS\LCMSMS\Aq Method\05102023\_WSV.lcm  
Data File: WSV\_CC\_09\_21  
Vial: 10 | Inj. Volume: 5.0000uL | Tray: 1

| Name                | Found RT | Area     | Ref 1 Actual Ratio | Conc.    | Dil. Factor |
|---------------------|----------|----------|--------------------|----------|-------------|
| Thiamine_B1         | 2.143    | 88348258 | 26.71              | 504.8121 | 1.00000     |
| Riboflavin_B2       | 8.987    | 2261092  | 38.65              | 500.1679 | 1.00000     |
| Nicotinic Acid_B3   | 5.638    | 103824   | 35.19              | 486.0072 | 1.00000     |
| Nicotinamide_B3     | 5.643    | 8007356  | 39.30              | 489.9094 | 1.00000     |
| Pantothenic Acid_B5 | 7.205    | 1720047  | 24.87              | 501.7350 | 1.00000     |
| Pyridoxin_B6        | 4.514    | 36121472 | 109.93             | 494.6339 | 1.00000     |
| Biotin_B7           | 8.802    | 7350255  | 14.99              | 500.6868 | 1.00000     |
| Folic Acid_B9       | 8.206    | 869541   | 33.53              | 500.4144 | 1.00000     |
| Cynocobalmine_B12   | 7.984    | 332839   | 16.71              | 502.1390 | 1.00000     |

### Thiamine\_B1

Conc. 504.8121

Area 88348258

R#1 26.71 (0.00)

Q 265.20>122.10 (+)

6.71e6

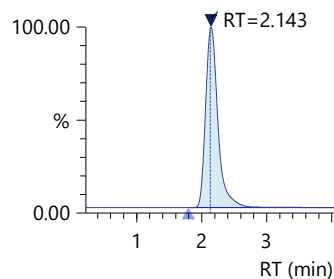

R1 265.20>144.10 (+)

1.77e6

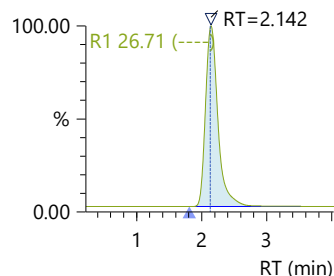

### Riboflavin\_B2

Conc. 500.1679

Area 2261092

R#1 38.65 (0.00)

Q 377.30>243.05 (+)

2.66e5

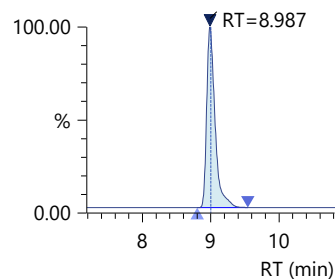

R1 377.30>172.15 (+)

1.03e5

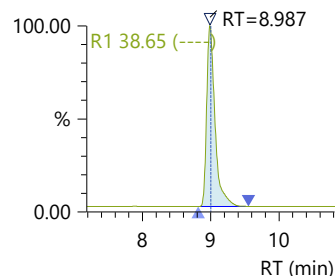

### Nicotinic Acid\_B3

Conc. 486.0072

Area 103824

R#1 35.19 (0.00)

Q 124.15>53.10 (+)

1.14e4

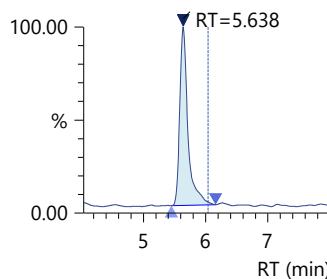

R1 124.15>78.05 (+)

4.95e3

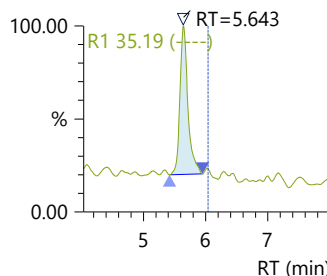

### Nicotinamide\_B3

Conc. 489.9094

Area 8007356

R#1 39.30 (0.00)

Q 123.15>80.15 (+)

8.34e5

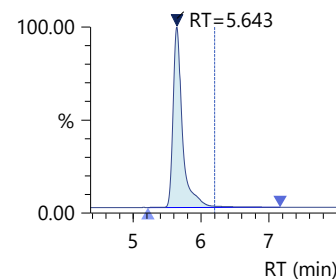

R1 123.15>53.10 (+)

3.28e5

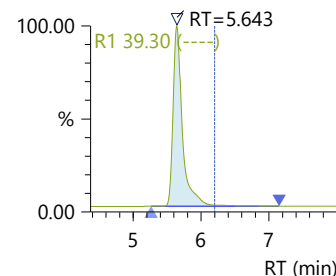

## WSV\_CC\_09\_21 (continued)

### Pantothenic Acid\_B5

Conc. 501.7350

Area 1720047

R#1 24.87 (0.00)

Q 220.20>90.10 (+)

1.98e5

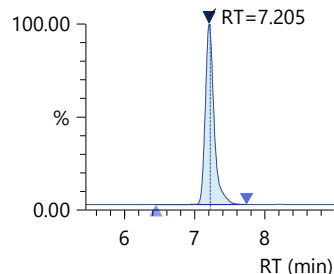

R1 220.20>72.00 (+)

4.90e4

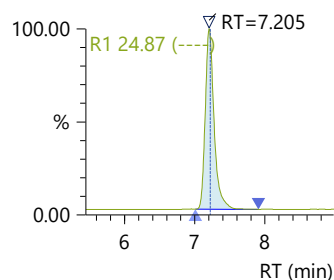

### Pyridoxin\_B6

Conc. 494.6339

Area 36121472

R#1 109.93 (0.00)

Q 170.25>152.20 (+)

3.09e6

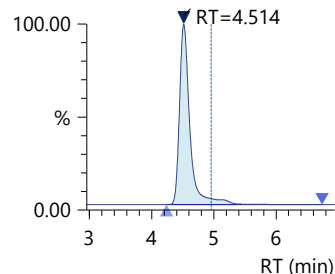

R1 170.25>134.10 (+)

3.38e6

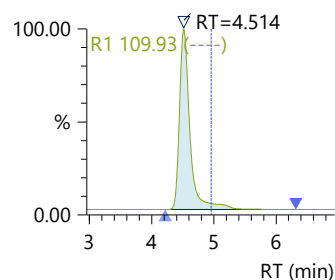

### Biotin\_B7

Conc. 500.6868

Area 7350255

R#1 14.99 (0.00)

Q 245.25>227.10 (+)

7.88e5

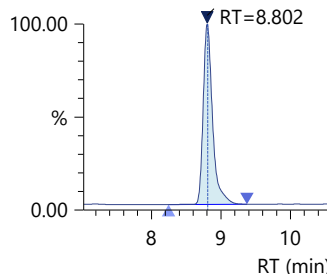

R1 245.25>97.10 (+)

1.18e5

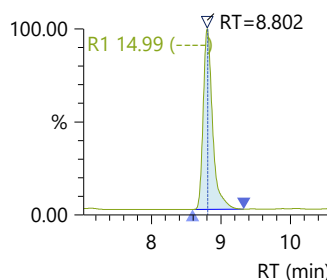

### Folic Acid\_B9

Conc. 500.4144

Area 869541

R#1 33.53 (0.00)

Q 442.30>295.20 (+)

8.81e4

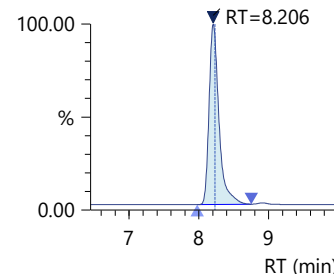

R1 442.30>176.20 (+)

2.96e4

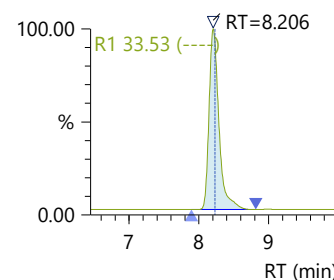

### Cynocobalmine\_B12

Conc. 502.1390

Area 332839

R#1 16.71 (0.00)

Q 678.50>147.00 (+)

3.47e4

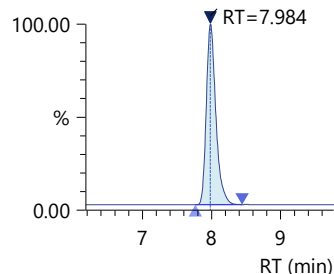

R1 678.50>359.00 (+)

5.95e3

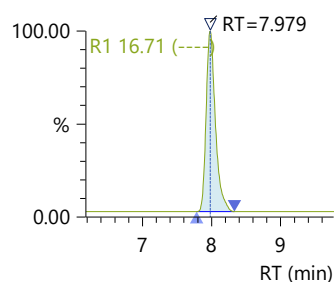

Supplement: Supplementary file 3 [file Vitamin result By LCMSMS.pdf › Vitamin result By LCMSMS.pdf]
