# Supplementary material
Source: Research Square preprint supplement (doi:10.21203/rs.3.rs-9674922/v1)
Supplement: Supplementary file 2 [file Minerals Results.pdf › Minerals Results.pdf]

5g sample  
 30mL 0.1 N HCl  
 After centrifugation  
 0.1mL Sample dissolved in 0.9mL diluent

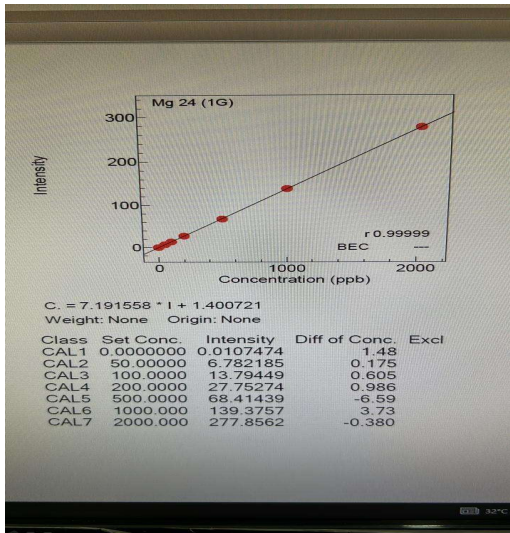

| Class | Set Conc. | Intensity | Diff of Conc. | Excl |
|-------|-----------|-----------|---------------|------|
| CAL1  | 0.000000  | 0.0274962 | 5.58          |      |
| CAL2  | 50.00000  | 0.2079577 | -16.1         |      |
| CAL3  | 100.0000  | 0.6162283 | -1.98         |      |
| CAL4  | 200.0000  | 1.331681  | 10.4          |      |
| CAL5  | 500.0000  | 3.191373  | 2.35          |      |
| CAL6  | 1000.000  | 6.374907  | 2.20          |      |
| CAL7  | 2000.000  | 12.71440  | -2.43         |      |

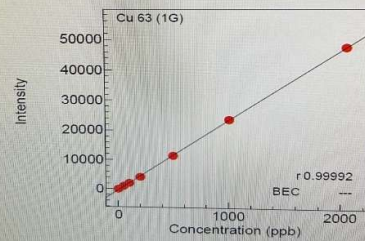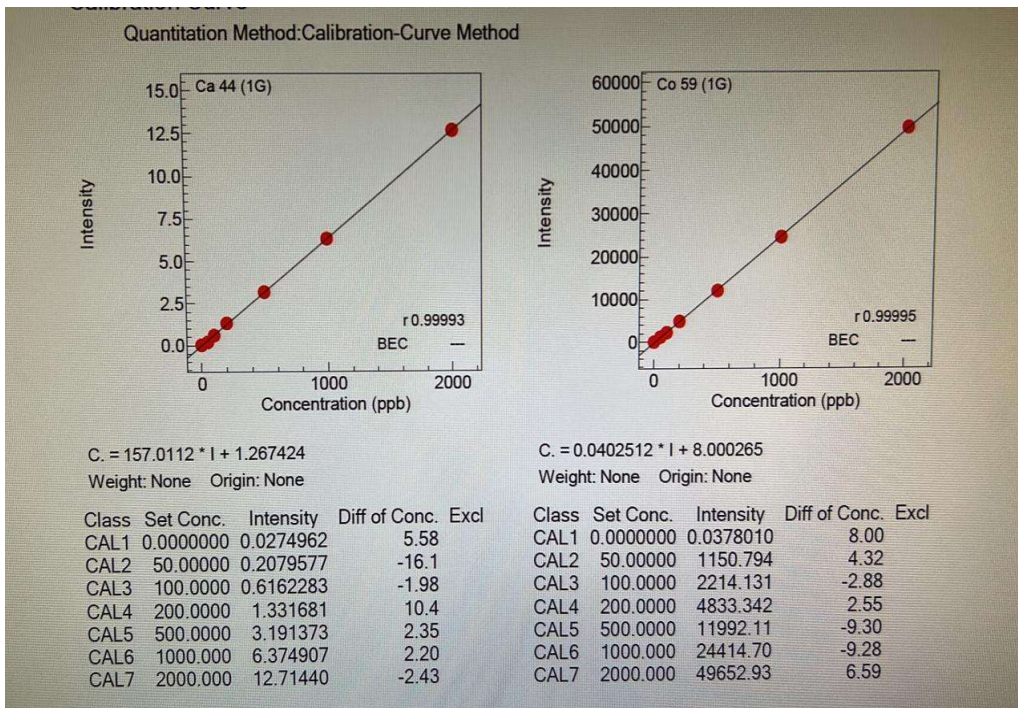

| Nutritional |      |      |      |      |
|-------------|------|------|------|------|
| Sample Name | Ca % | Co % | Cu % | Mg % |
| ULVA        | 6.32 | 0.38 | 0.55 | 3.76 |
